# Supplementary material for: Saturation mutagenesis of twenty disease-associated regulatory elements at single base-pair resolution
Source: PubMed Central journal article supplement (PMC6687891; doi:10.1038/s41467-019-11526-w), 2019-08-08
Supplement: 41467_2019_11526_MOESM1_ESM.pdf [file 41467_2019_11526_MOESM1_ESM.pdf]

# Supplementary Information

## Saturation mutagenesis of twenty disease-associated regulatory elements at single base-pair resolution

Martin Kircher<sup>1,2,3,^,\*</sup>, Chenling Xiong<sup>4,5,^</sup>, Beth Martin<sup>1,^</sup>, Max Schubach<sup>2,3,^</sup>, Fumitaka Inoue<sup>4,5</sup>, Robert J.A. Bell<sup>6</sup>, Joseph F. Costello<sup>6</sup>, Jay Shendure<sup>1,7,\*</sup>, Nadav Ahituv<sup>4,5,\*</sup>

- 1 Department of Genome Sciences, University of Washington, Seattle WA, USA
- 2 Berlin Institute of Health (BIH), Berlin, Germany
- 3 Charité – Universitätsmedizin Berlin, Berlin, Germany
- 4 Department of Bioengineering and Therapeutic Sciences, University of California San Francisco, San Francisco, CA, USA
- 5 Institute for Human Genetics, University of California San Francisco, San Francisco, CA, USA
- 6 Department of Neurosurgery, University of California San Francisco, San Francisco, CA, USA
- 7 Brotman Baty Institute for Precision Medicine, Seattle WA, USA

^ These authors contributed equally

\* Please direct correspondence to [Nadav.Ahituv@ucsf.edu](mailto:Nadav.Ahituv@ucsf.edu), [shendure@uw.edu](mailto:shendure@uw.edu) or [martin.kircher@bihealth.de](mailto:martin.kircher@bihealth.de)

## Supplementary Note 1

All graphs showing inferred variant effects for SNVs from promoters or enhancers with available annotation data are shown in [Supplementary Figure 8](#) or [Supplementary Figure 9](#), respectively.

All correlations between replicates are shown in [Supplementary Table 7](#). An overview of the promoter elements is in [Supplementary Table 1](#) and [Supplementary Table 2](#) contains all enhancer elements.

All MPRA results for disease-associated promoter or enhancer mutations referenced in the text are provided in [Supplementary Table 10](#) or [Supplementary Table 11](#), respectively.

## Promoters (in alphabetical order)

### Factor IX (F9)

Hemophilia B Leyden is an X-linked bleeding disorder characterized by low plasma levels of blood coagulation Factor IX (F9) during childhood. Single point mutations in the F9 promoter at positions NM\_000133.3:c.-55G>C, c.-50T>G, c.-49T>A, c.-35G>A/C, c.-34A>T, c.-22 T>C and c.-17A>G/C have been found to be associated with this disease ([Supplementary Table 10](#))<sup>1,2</sup>. The hepatocyte nuclear factor 4 alpha (HNF4A) is thought to bind to this promoter at positions -63 to -39 to activate F9<sup>1,2</sup> and both c.-55G>C and c.-49T>A are thought to reduce promoter activity due to aberrant HNF4A binding. In our MPRA results, carried out in HepG2 cells, we did not observe a significant reduction of promoter activity due to mutations in the HNF4A binding region (-63 to -39). We believe that this is mostly due to low barcode coverage at this region. However, we did observe that variants (c.-51T>A, c.-51T>C, c.-50T>A, c.-49T>A) in the core CTTTG sequence of the HNF4A motif (JASPAR ID MA0114.2) led to reduced promoter activity. We also found another region, positions -235 to -222, where mutations led to a significant reduction in promoter activity. Analysis of ENCODE motifs<sup>3</sup> of this region suggests that it is associated with Ets-related factors. In addition to the repressing variants, we observed activating variants in F9, several of which increase the transcription level up to 200%. These include mutations c.-25T>A and c.-25T>G, which are located in another annotated HNF4A motif, with both variants leading to a stronger motif. Overall, our results showed a high correlation between replicates (0.88 Pearson correlation; [Supplementary Table 7](#)).

### FOXE1

A SNP, rs1867277 (NM\_004473.3:c.-283G>A), in the promoter of the Forkhead Box E1 (*FOXE1*) gene was found to be associated with papillary thyroid cancer susceptibility<sup>4</sup>. The cancer-associated allele is thought to recruit the upstream transcription factor (USF) 1 and 2. Transfection studies in HeLa cells co-transfected with USF1 and USF2 showed

that the cancer-associated allele (A) led to a significant increase in promoter activity (~8 fold versus empty vector) compared to the unassociated allele (~3.5 fold versus empty vector)<sup>4</sup>. Our MPRA for this promoter was carried out in HeLa cells along with the co-transfection of USF1 and USF2. We did not observe a significant effect on promoter activity for rs1867277 ([Supplementary Table 10](#)). Overall, we only observed that 6 out of 1923 variants with a minimum of 10 associated tags showed a significant effect ( $p$ -value  $< 10^{-5}$ ) on promoter activity, but with low expression effects. Our three technical replicates also had the lowest correlation of all MPRA experiments (0.16 Pearson correlation; [Supplementary Table 7](#)), precluding our ability to provide definitively interpretable results for this promoter.

### GP1BB

Bernard–Soulier syndrome (BSS) is a rare autosomal recessive bleeding disorder characterized by defects of the GPIb-IX-V complex, a platelet receptor for von Willebrand factor (VWF). Most of the mutations identified in the genes encoding for the GP1BB (GPIb $\alpha$ ), GP1BB (GPIb $\beta$ ), and GP9 (GPIX) subunits prevent expression of the complex at the platelet membrane or its interaction with VWF. A mutation at the *GP1BB* promoter, NM\_000407.4:c.-160C>G, is thought to disrupt the second GATA consensus binding site, and was shown to decrease promoter activity by 84% ([Supplementary Table 10](#))<sup>5</sup>. In our MPRA, which was carried out in HEL 92.1.7 cell lines (erythroblasts originating from human bone marrow), we also observed a reduction in promoter activity for this mutation (52% promoter activity compared to baseline). We also saw a significant reduction across the whole GATA binding site. Several additional regions led to reduced promoter activity. For example, chr22:19,710,886-19,710,900 (GRCh37), which is annotated by JASPAR to have binding sites for Ets-related factors<sup>6</sup>, showed significant reduction of promoter activity due to various mutations. Additional regions such as chr22:19,710,912-19,710,923, chr22:19,710,940-19,710,949 or chr22:19,711,001-19,711,032 (all GRCh37) also encompassed several mutations that led to significant reduction in promoter activity. Overall, we observed a good correlation (0.88 Pearson correlation; [Supplementary Table 7](#)) between replicates for this MPRA.

### HBB

Mutations in the the Hemoglobin Subunit Beta (*HBB*) gene cause beta thalassemias ( $\beta_0$  or  $\beta_+$ ), characterized by reduced hemoglobin levels that lead to lower oxygen levels in the body. The severity of the disease depends on the nature of the mutation. There are 31 clinical variants in the *HBB* promoter that were reported as disease causing, based on the [Leiden Open Variation Database \(https://lovd.bx.psu.edu/home.php?select\\_db=HBB\)](https://lovd.bx.psu.edu/home.php?select_db=HBB)<sup>7</sup>. In our MPRA, which was carried out in in HEL 92.1.7 cells (erythroblasts originating from human bone marrow), 17 out of 31 clinical variants were found to have a significant effect on promoter activity ( $p$ -value  $<$

10<sup>-5</sup>) ([Supplementary Table 10](#)). We observed several blocks where mutations led to reduction in activity, possibly due to transcription factor binding sites. For example, in positions c.-142 to c.-136 there is a known binding site for the erythroid Krüppel factor (EKLF), a zinc-finger transcription factor that plays a critical role in erythropoiesis and regulation of  $\beta$ -globin switching<sup>8</sup>. We observed a decrease in expression of about 12%-19% for previously reported nucleotide variants within this binding site ([Supplementary Table 10](#)). In contrast, the promoter mutation NM\_000518.4:c.-18C>G, which has been previously shown to decrease steady state levels of mRNA to 85.2%<sup>9</sup> and is thought to disrupt the binding and transactivation of EKLF (causing mild  $\beta^+$  thalassemia<sup>8</sup>), did not show a significant effect in our study ([Supplementary Table 10](#)). We identified 12 promoter activating variants (showing greater than 20% upregulation in promoter activity), for example variant c.-99C>G showed a 128% increase in activity ([Supplementary Table 10](#)) and could potentially have a strong effect on *HBB* expression. Overall, we observed a good correlation between technical replicates (0.77 Pearson correlation; [Supplementary Table 7](#)). There could be several reasons why some of our MPRA results don't completely match previous results for these clinically associated variants. Our p-value minimum threshold might be too stringent to allow us to characterize these mutations (e.g. if we use a p-value threshold of 0.01, 23 out of the 31 variants show a significant effect on promoter activity), the clinical association might be incorrect and/or experimental differences could be contributing to these differences.

## HBG1

The Hemoglobin Subunit Gamma 1 gene (*HBG1*) is a component of fetal hemoglobin, which is later replaced by adult hemoglobin at birth. Fourteen mutations in the promoter of this gene (NM\_000559.2:c.-264C>T, c.-255C>T, c.-255C>G, c.-251T>C, c.-250C>T, c.-249C>T, c.-248C>G, c.-228T>C, c.-211C>T, c.-170G>A, c.-167C>T, c.-167C>G, c.-167C>A, c.-167A>C) have been identified in patients with hereditary persistence of fetal hemoglobin (HPFH; OMIM 142200; [Supplementary Table 10](#)). Work carried out in human erythroleukemia cells (K562 and HEL) has identified several proteins that may bind to the *HBG1* promoter and either activate or repress its activity<sup>10</sup>. For example, gamma CAAT is thought to bind to duplicated CCAAT box sequences (c.-168 to c.-164, c.-141 to c.-137) and activate activity. The c.-170G>A mutation is thought to increase the affinity of interaction between gamma CAAT and its cognate site. Two proteins, gamma CAC1 and gamma CAC2, bind a CACCC sequence located c.-197 to c.-194 from the TSS. Gamma OBP, binds an octamer sequence ATGCAAAT located c.-235 to c.-228 from the TSS. c.-228T>C mutates the eighth base of this octamer leading to a reduction of Gamma OBP binding and upregulation of *HBG1* expression, suggesting that OBP may act as a repressor in this context. The Sp1 transcription factor (SP1) is thought to function as a transcriptional activator, binding to positions c.-266 to c.-244. The c.-255C>G mutation is predicted to enhance SPI binding activity (5 to 10 fold-higher affinity for SP1) while c.-

255C>T decreases the similarity to the SP1 recognition site and is associated with a more moderate increase in *HBG1* expression<sup>10,11</sup>.

We carried out MPRA on the *HBG1* promoter in HEL 92.1.7 cells (erythroblasts originating from human bone marrow) obtaining high reproducibility between technical replicates (0.92 Pearson correlation; [Supplementary Table 7](#)). We detected multiple blocks where mutations lead to reduced promoter activity, suggesting they serve as binding sites for activating transcription factors. We saw a significant repressive activity for mutations within the CAAT, CCAAT and CACCC blocks. However, we did not observe a continuous block of significant variants in our MPRA for the ATGCAAAT octamer sequence (c.-235 to c.-228) and the SP1 element (c.-266 to c.-244). Two blocks, one unannotated as a GAAATAA sequence from c.-84 to c.-77 and the other is the CCAAT box from c.-141 to c.-137, showed a strong correlation with PhastCons vertebrate conservation scores.

As for individual mutations, we observed a significant change in promoter activity (p-value < 10<sup>-5</sup>) for 6 (c.-255C>T, c.-251T>C, c.-228T>C, c.-211C>T, c.-167C>T, c.-167C>A) of the 14 disease-associated mutations ([Supplementary Table 10](#)). For example, c.-228T>C showed a strong increase in expression of over 50% and c.-167C>T led to a 65% reduction in promoter activity. Similar to *HBB*, these results could be due to: 1) Our p-value minimum threshold being too stringent (if we use a p-value threshold of 0.01, 8 out of the 14 variants show a significant effect on promoter activity); 2) The clinical association might be incorrect; 3) Experimental differences could all be contributing to these differences 4) Another limitation of our results for this promoter could be due to its regulation being driven by a complex pattern of repressor and activator binding which are temporally expressed.

## **HNF4A P2 promoter**

Mutations in the Hepatocyte Nuclear Factor 4 Alpha (*HNF4A*) gene lead to maturity-onset diabetes of the young (MODY), a monogenic autosomal dominant subtype of early-onset diabetes mellitus caused by defective insulin secretion of pancreatic beta cells<sup>12,13</sup>. *HNF4A* has two characterized promoters, P1 and P2. We focused on the distant upstream P2 promoter, which is 46 kb 5' to the P1 promoter and is thought to be the major promoter regulating *HNF4A* pancreatic beta and hepatic cell expression<sup>12</sup>. Mutations in this promoter (NM\_175914.4:c.-136A>G, c.-146T>C, c.-169C>T, c.-181G>A, c.-192C>G) have been associated with MODY<sup>80,81</sup> and are thought to affect the binding of various transcription factors and reduce promoter activity. Transfection assays with various mutations have identified functional binding sites for *HNF1A*, *HNF1B*, pancreatic and duodenal homeobox 1 (PDX1) and other transcription factors known to be associated with MODY<sup>12</sup>. They also showed that mutations c.-136A>G and c.-169C>T lead to reduced promoter activity compared to the wild-type sequence in HEK293 cells<sup>12,13</sup>.

We carried out MPRA in HEK293T cells and observed an average Pearson correlation of 0.89 across replicates ([Supplemental Table 7](#)). Out of the five MODY-associated

mutations, we only observed a significant effect for c.-192C>G, which increased promoter activity by 20% ([Supplementary Table 10](#)). For c.-146T>C we observed a marginal reduction in activity (4%). Of interest were two variants, c.-6T>G and c.-138T>C, which increased activity up to 200% and might create strong new TF binding sites. Only c.-138T>C showed an overlap with motifs in ENCODE<sup>3</sup> (ONECUT1/2/3), with this variant causing a disruption in the binding site (position 7 of the MA0756.1 JASPAR<sup>6</sup> motif; compare with [Supplementary Figure 8](#)).

## MSMB

A SNP, rs10993994, in the promoter (-57 bp from TSS) of the Microseminoprotein Beta (*MSMB*) gene was found to be associated with prostate cancer risk in two separate GWAS<sup>14,15</sup> and showed differential reporter activity<sup>16,17</sup>. The risk allele, T, of this SNP reduced promoter activity to 30% and 13% compared to the unassociated allele in HEK293T human embryonic kidney cells and prostate cancer cell lines (LNCaP), respectively<sup>18,19</sup>. We carried out MPRA for this promoter in HEK293T cells line, and observed a good correlation between replicates (0.88 Pearson correlation; [Supplementary Table 7](#)). For rs10993994, we obtained a 15% increase in promoter activity for the risk allele (T) instead of reduction in promoter activity as observed in LNCaP cells ([Supplementary Table 10](#)). This is likely due to the difference in cell lines used. The *MSMB* promoter has two potential androgen response element half sites (TGTTCT) located -113 to -118 bp 5' to the TSS and another is 23 bp upstream of SNP rs10993994<sup>18</sup> (chr10:51,549,467-51,549,472; GRCh37), which are likely to only get activated in LNCaP cells but not in HEK293T cells. We observe multiple blocks that showed significant effects on promoter activity, which align with ENCODE motifs and conservation at the 3' half, but not on the other half ([Supplementary Figure 8](#)).

## PKLR

Three different single nucleotide mutations (NM\_000298.5:c.-324T>A, c.-83G>C, c.-72A>G) and a polymorphic deletion c.-248delT in the promoter of the Pyruvate Kinase L/R (*PKLR*) gene have been found in patients with pyruvate kinase (PK) deficiency<sup>20,21</sup>, which leads to anemia. Functional analysis for both rat and human *PKLR* promoters revealed four conserved motifs (CAC/SP1, PKR-RE, GATA1) within the first 250 bp upstream region<sup>21</sup>. Both c.-72A>G and c.-83G>C significantly reduced promoter activity. c.-72A>G has been attributed to disruption of the consensus binding motif for GATA-1 at c.-69 to c.-74. c.-83G>C was shown to be a part of a core binding motif (CTCTG) of a novel regulatory element (PKR-RE1) in the erythroid-specific promoter of *PKLR*, in close proximity to a regulatory GATA-1 binding site. c.-324T>A did not show an effect on promoter activity, c.-248delT turned out to be a non-functional polymorphism<sup>20,21</sup>.

We carried out MPRA for this promoter using two different post-transfection time points (24 and 48 hours) in K562 cells and observed a good correlation between replicates (0.86

and 0.91 Pearson correlation for 24hr and 48hr respectively; [Supplementary Table 7](#)). We observed a significant reduction in promoter activity for two of the disease causing mutations, c.-72A>G (24h=-1.77, 48h=-2.40) and c.-83G>C (24h=-1.25, 48h=-2.19). For c.-324T>A and c.-248delT we did not observe a significant effect which is consistent with the previous functional study<sup>20,21</sup>. Around 15% of all tested variants showed a significant effect, with the majority of these variants being located either near the 3' or 5' end, suggesting that these two regions are important for *PKLR* promoter activity. All positions at the GATA1 conserved site from c.-73 to c.-70 had significant repressing variants in both experiments. The same repressing effects can be seen for the two conserved CAC/SP1 sequences (c.-119 to c.-114 and c.-107 to c.-103) and the PKR-RE motif (c.-87 to c.-83). In general, annotated motifs align well with the significant variant effects on *PKLR* ([Supplementary Figure 8](#)). This experiment had one of the highest correlation for JASPAR motifs ([Supplementary Table 12, 13](#)), compared to all tested promoter elements.

## Enhancers (in alphabetical order)

### BCL11A

B cell CLL/lymphoma 11A (*BCL11A*) is a transcription factor that regulates hemoglobin switching and has a characterized erythroid enhancer where common genetic variation has been associated with fetal hemoglobin (HbF) levels<sup>22</sup>. Saturation mutagenesis of the *BCL11A* enhancer via CRISPR-Cas9 guide RNA libraries uncovered key functional regions in this enhancer and implicated DNase hypersensitive site (DHS) +58 to have the most significant effect on *BCL11A* expression and HbF levels<sup>23</sup>. We thus used DHS +58 for our MPRA, which was carried out in the HEL92.1.7 erythroblast cell line. For the *BCL11A* experiments, we did not observe high correlations between replicates (0.38 Pearson correlation; [Supplementary Table 7](#)), possibly due to low fold activation by this enhancer in our assay/cell line (2.5 fold compared to empty vector) and a high mutation rate from the error-prone PCR step (creating an average of 6 variants per construct and very few wild-type sequences; factors that negatively impact model fit). Only 3% of the tested variants had a significant effect (p-value < 10<sup>-5</sup>). The average log<sub>2</sub> expression effect of all variants was only 0.064 (4.5%) and 0.21 (16%) for the subset of significant variants. The low activation we observed for this enhancer could be due to the use of different cell lines. HEL92.1.7 is an established erythroblast cell line collected from bone marrow. HUDEP-2<sup>24</sup>, which was used for the CRISPR-Cas9 assays, are human erythroid progenitors derived from the umbilical cord and are thought to be more similar to adult erythroid cells. It could also be due to differences in experimental methodologies, i.e. endogenous mutations via CRISPR-Cas9 that assay phenotypic changes versus MPRA that test the ability of the sequence to drive regulatory activity.

## IRF4

A SNP, rs12203592, within an intron of the gene encoding the Interferon Regulatory Factor 4 (*IRF4*), a transcription factor involved in pigmentation, is strongly associated with sensitivity of skin to sun exposure, freckles, blue eyes and brown hair color<sup>25</sup>. *IRF4* is activated by the melanocyte master regulator melanocyte inducing transcription factor (MITF) along with the transcription factor AP-2 alpha (TFAP2A). The pigmentation-associated allele, rs12203592-T, is thought to disrupt a TFAP2A binding site and was shown to reduce enhancer activity<sup>25</sup>. We carried out saturation-based MPRA for this enhancer in human melanoma SK-MEL-28 cells and observed strong correlations between technical replicates (0.99 Pearson correlation; [Supplementary Table 7](#)). The rs12203592-T allele led to a significant reduction in enhancer activity, 36% compared to wild-type ([Supplementary Table 11](#)). Overall, we observed that 37% of the variants had a significant effect on enhancer activity. Conservation seems to be an informative measurement for activity and *IRF4* has one of the best agreement between different annotations and absolute expression effects (see Results and [Supplementary Table 12, 13](#)).

## IRF6

A SNP, rs642961, in an Interferon Regulatory Factor (*IRF6*) associated-enhancer was shown to confer an 18% attributable risk for isolated cleft lip<sup>26</sup>. This variant is part of a common haplotype, rs76145088 (G>A), rs642961 (G>A) and rs77542756 (A>G) and the AAG associated-haplotype is thought to disrupt AP-2 $\alpha$  binding sites and increase enhancer activity compared to the unassociated haplotypes in human foreskin keratinocyte HFK cells<sup>26</sup>. However, this difference did not reach statistical significance. Saturation based MPRA for this *IRF6* enhancer was done in the human keratinocyte HaCaT cells and obtained a strong correlation between technical replicates (0.96 Pearson correlation; [Supplementary Table 7](#)). We observed that around 19% of all variants show a significant effect on enhancer activity. We did not observe a significant effect on enhancer activity for rs642961 and rs77542756 by themselves ([Supplementary Table 11](#)). However, the region where rs642961 and rs77542756 were located (chr1:209,989,152-209,989,314; GRCh37) had several activating mutations. For SNP rs76145088 our MPRA detected a significant repression by 18% ([Supplementary Table 11](#)). We could not detect an enrichment of significant variants at the AP-2 $\alpha$  binding sites and because of the design of our MPRA, the associated-haplotype AAG is not covered. *IRF6* had several conserved sites, but most of them do not align with blocks of significant expression effects ([Supplementary Figure 9](#)), leading to low correlation of conservation and functional scores ([Supplementary Table 12, 13](#)). Of note, although rs642961 shows minor effects on reporter gene expression in cell culture, it is possible that it has significantly larger or even opposing effects on *IRF6* expression in vivo in its native chromosomal context and/or in the presence of trans-acting variants<sup>26</sup>.



## MYC rs6983267 and rs11986220

Activation of the MYC proto-oncogene, bHLH transcription factor (*MYC*) gene is a hallmark of cancer initiation and maintenance. Several GWAS reported association between the G-allele of rs6983267 and increased risk for various types of cancers such as colorectal and prostate cancer<sup>27–29</sup>. Studies have also shown that a region including rs6983267 has enhancer activity and interacts with the proto-oncogene *MYC* during early stages of colorectal cancer development<sup>30,31</sup>. rs11986220 resides ~100 kb away from rs6983267, and is associated with prostate cancer risk independent of rs6983267<sup>32</sup>. rs11986220 resides within a FOXA1 binding site, and the prostate cancer risk allele (A) is thought to facilitate both stronger FOXA1 binding and androgen responsiveness<sup>32</sup>. To study the individual variant effects of these SNPs and their surrounding sequences, we generated saturation mutagenesis libraries of 600 bp around rs6983267 and 464 bp around rs11986220. We tested the MYC rs6983267 MPRA library in human embryonic kidney cells, HEK293T, adding 20mM LiCl to activate the Wnt pathway and the MYC rs11986220 in human prostate adenocarcinoma LNCaP cells grown in a medium with 100nM Dihydrotestosterone to stimulate androgen activity.

For MYC rs6983267, we observed a strong correlation between replicates (0.75 Pearson correlation; [Supplementary Table 7](#)). We did not see a change in activity (p-value of coefficient 0.05; log<sub>2</sub> expression effect -0.08 / 95% activity) due to the cancer-associated rs6983267 allele (T) ([Supplementary Table 11](#)). We observed a stretch of nucleotides that led to a reduction in enhancer activity at chr8:128,413,089-128,413,107 (GRCh37). This region correlates with an annotated CTCF binding site as determined by ERB v90<sup>33</sup>. Of note, two variants, chr8:128,413,279C>G and chr8:128,413,289G>T (GRCh37) led to a strong increase in enhancer activity by 86% and 84%.

For MYC rs11986220, we did not obtain a good correlation between replicates (0.31 Pearson correlation; [Supplementary Table 7](#)). rs11986220 showed a 14% repressing activity, but was not statistically significant ([Supplementary Table 11](#)). In total, only 11 out of 1685 variants had an expression effect on enhancer activity at a significance level of 10<sup>-5</sup>.

## RET

A common non-coding variant, rs2435357, within an enhancer in intron 1 of the gene Rearranged During Transfection Proto-oncogene (*RET*) is significantly associated with Hirschsprung disease (HSCR) susceptibility<sup>34</sup>. The disease-associated variant leads to a significant reduction in reporter activity (6-8 fold) compared to the unassociated allele in Neuro-2a cells<sup>34</sup>. Saturation mutagenesis based MPRA was carried out for this enhancer in Neuro-2a cells, with the library cloned into the pGL3 vector, similar to the experiment that originally tested this enhancer<sup>34</sup>. Overall, we observed a reasonable correlation between technical replicates (0.71 Pearson correlation; [Supplementary Table 7](#)). We did not detect a significant effect on enhancer activity for rs2435357 ([Supplementary Table](#)

[11](#)). However, this SNP is located within a sequence block that has multiple variants with significant activating and repressing effects (chr10:43,582,096-43,582,232; GRCh37). Both rs2506005 and rs2506004, which reside 76 bp upstream and 217 bp downstream of rs2435357 respectively, and are in linkage disequilibrium with this SNP, also showed no significant effect on enhancer activity. A region located towards the 3'-end of the sequence (chr10:43,582,390-43,582,526; GRCh37) is enriched in variants that led to differential enhancer activity.

## **TCF7L2**

GWAS for type-2 diabetes (T2D) found a significant association with SNP rs7903146, located within an intron of the gene Transcription Factor 7 Like 2 (*TCF7L2*). The rs7903146 risk T allele is associated with impaired insulin secretion, incretin effects and enhanced rate of hepatic glucose production<sup>35</sup>. Luciferase assays of both alleles in mouse pancreatic beta MIN6 cells exhibited significant allele-specific differences with the T allele leading to a three fold stronger enhancer activity compared to the non-risk allele ([Supplementary Table 11](#))<sup>102</sup>. We carried out mutation saturation based MPRA for this enhancer in MIN6 cells, which covered over 99% of all mutations in the tested region ([Supplementary Table 3](#)) and obtained high variant effect correlations between replicates (0.76 Pearson correlation; [Supplementary Table 7](#)). Functional and conservation scores do not correlate well with the observed variant effects, but we observed some correlation with JASPAR motifs ([Supplementary Table 12, 13](#)). We do observe a significant effect on enhancer activity for rs7903146, even though only a 19% expression increase.

## **UC88**

Ultraconserved elements (UCEs) are sequences greater than 200 bp in length that are identical between human, mouse and rat<sup>36</sup>. Half of the UCEs were shown to be functional enhancers in developing mouse embryos, the majority of which are active in the central nervous system<sup>37</sup>. UC88 is located on chr2:162,094,920-162,095,508 (GRCh37) and was shown to be a robust forebrain enhancer at mouse embryonic day E11.5 (hs416; VISTA enhancer browser<sup>38</sup>). UC88 was tested for enhancer activity in mouse neuroblastoma Neuro-2a cells and showed significant enhancer activity (9.3 fold compared to empty vector). Mutation saturation based MPRA was performed on UC88 in Neuro-2a cells. Replicates had a lower replicate correlation (0.64 average Pearson coefficient); however, this increased to 0.9 for significant variants (using a lenient p-value threshold of < 0.01) ([Supplementary Table 7](#)). This limited our interpretability to 10% (196 out of 1964, p-value < 0.01) of all measured variants in UC88, not allowing us to see clear patterns regarding known motifs or other annotations ([Supplementary Figure 9](#)). Overall, we obtained a low correlation of functional, conservation and motif scores ([Supplementary Table 12, 13](#)).

### ZFAND3

A Type 2 Diabetes GWAS found an associated with rs58692659, which is ~10 kb upstream to the zinc finger AN1-type containing 3 (*ZFAND3*) gene<sup>39</sup>. The rs58692659 SNP maps to an open chromatin region, identified previously by both islet FAIRE-seq and ChIP-seq for H2A.Z, and is thought to be bound by several beta cell transcription factors, including PDX1, FOXA2, NKX2.2 NKX6.1 and NEUROD1. Further TFBS analyses and EMSA suggest that the T allele alters the binding of NEUROD1<sup>39</sup>. Luciferase assays showed reduced enhancer activity (~5 fold) for the rs58692659 risk allele (T) compared to the C allele in mouse MIN6 beta cells<sup>39</sup>. We carried out mutation saturation based MPRA on this enhancer in MIN6 cells and obtained high variant effect correlations between replicates (0.89 Pearson correlation; [Supplementary Table 7](#)). For rs58692659, we observed a significant reduction in enhancer activity (70% residual activity) for the disease-associated allele (T) which is consistent with the previous reported luciferase results. Furthermore, we found that rs58692659 resides in a region (chr6:37,775,451-37,775,758; GRCh37) that with numerous mutations that lead to either a reduction or increase in enhancer activity ([Supplementary Table 11](#)). This region is highly conserved in vertebrates and contains predicted binding sites for the islet-enriched transcription factors RFX4, MAX and NHLH1<sup>39</sup> as annotated by JASPAR 2018<sup>6</sup>. Due to the high correlation of conservation, the tested functional scores result in high correlations as well (Spearman correlation ~0.4; [Supplementary Table 12, 13](#)).

### ZRS

Mutations in the Sonic Hedgehog (*SHH*) limb enhancer, called the zone of polarizing activity regulatory sequence (ZRS), lead to a wide array of limb malformations<sup>40</sup>. These include polydactyly, triphalangeal thumb (TPT), syndactyly, tibial hypoplasia and Werner mesomelic syndrome (OMIM #188770)<sup>41-46</sup>. Several of these mutations were tested for enhancer activity using mouse transgenic assays, with the majority showing ectopic expression compared to the wild-type sequence<sup>40</sup>. *In vitro* assays were also done for a 1.7 kb version of this enhancer in NIH3T3 mouse fibroblasts which showed higher enhancer activity upon co-transfection of homeobox d13 (*Hoxd13*) and heart and neural crest derivatives expressed 2 (*Hand2*). As we were limited in length due to technical reasons, we first tested a 485 bp ZRS sequence that encompasses the majority of disease causing mutations in this *in vitro* system. We observed a significant fold change for co-transfections with *Hoxd13* by itself (4.2 fold) or along with *Hand2* (2.0 fold) compared to the empty vector. We thus set out to do saturation mutagenesis MPRA in NIH3T3 cells using both conditions (i.e. *Hoxd13* or *Hoxd13*+*Hand2*).

We observed reasonable correlations between technical replicates (0.76 Pearson correlation for both *Hoxd13* or *Hoxd13*+*Hand2*; [Supplementary Table 7](#)). Overall, we did not detect a high fraction of significant variant effects and those that were significant were distributed over the entire region with stronger effects towards the 3' end. For most

disease-causing mutations, we did not observe a significant effect, likely due to technical reasons. These could be due to this enhancer having important spatial and temporal activities in the developing limb that are likely not represented in an *in vitro* setting that uses a single cell type along with the co-transfection of additional factors. However, we did observe an effect for some known mutations. These include chr7:156,584,153T>C (GRCh37; ZRS417), which resulted in 16% and 9% increase with Hoxd13 and Hoxd13+Hand2 respectively (Supplementary Table 11), and is known to cause a more severe limb phenotype which includes polydactyly of the four extremities and bilateral tibial deficiency<sup>44</sup>. Another interesting mutation is chr7:156,584,285C>A (GRCh37; ZRS285) that led to 17% and 13% higher enhancer activity with Hoxd13 and Hoxd13+Hand2 respectively ([Supplementary Table 11](#)), and is known to cause polydactyly in Silkie chickens<sup>47</sup>.

# Supplementary Figures

## Supplementary Figure 1

A

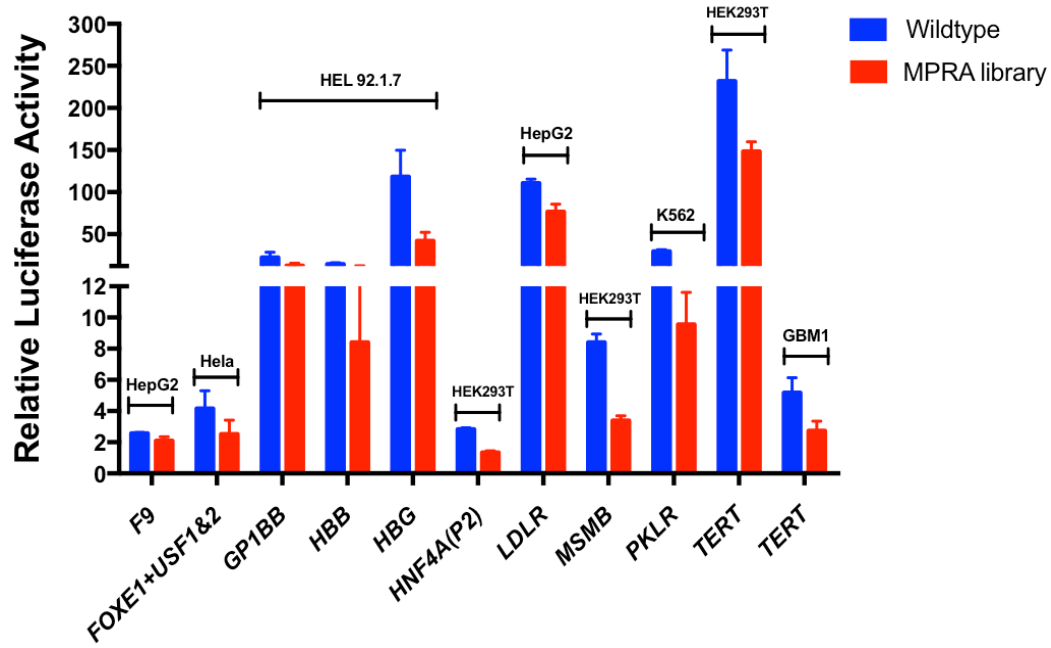

B

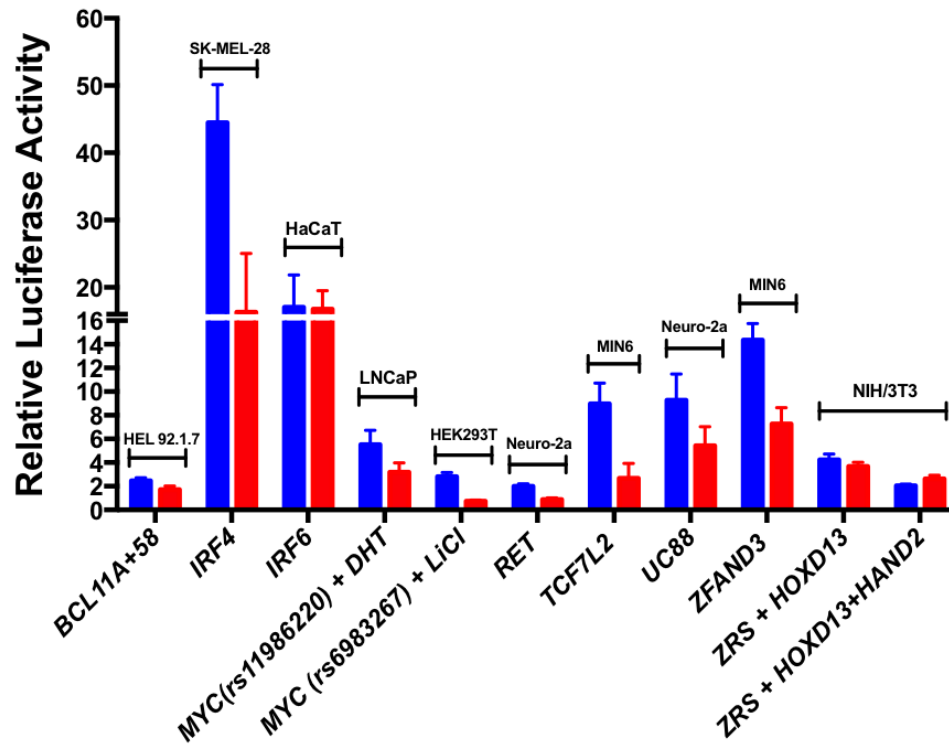

**Promoter and enhancer luciferase assays.** Bar charts representing the relative luciferase activity of the 10 selected promoters **(A)** and 10 selected enhancers **(B)** for either the wild-type (blue) or the saturation mutagenesis library (mutant library; red) normalized to the empty vector. In **(A)**, for *FOXE1*, 7.5ug of upstream transcription factor (USF) 1 and 2 were co-transfected along with the vector/library. All promoters activities were measured after 24hr transfection except for *PKLR* which was measured after 48hr. In **(B)**, for *ZRS*, 3.75ug *HOXD13* or *HOXD13* plus *HAND2*, were co-transfected along with the vector/library. For *MYC* (rs11986220), 10nM dihydrotestosterone (DHT) were also co-transfected. For *MYC* (rs6983267), 20mM of LiCl was added after 24hr to induce Wnt pathway activity and luciferase activity was measured at 32 hours. For all other enhancers, luciferase activity was measured 24 hours after transfection. All results are mean  $\pm$  standard deviation of at least 3 independent experiments.

Supplementary Figure 2

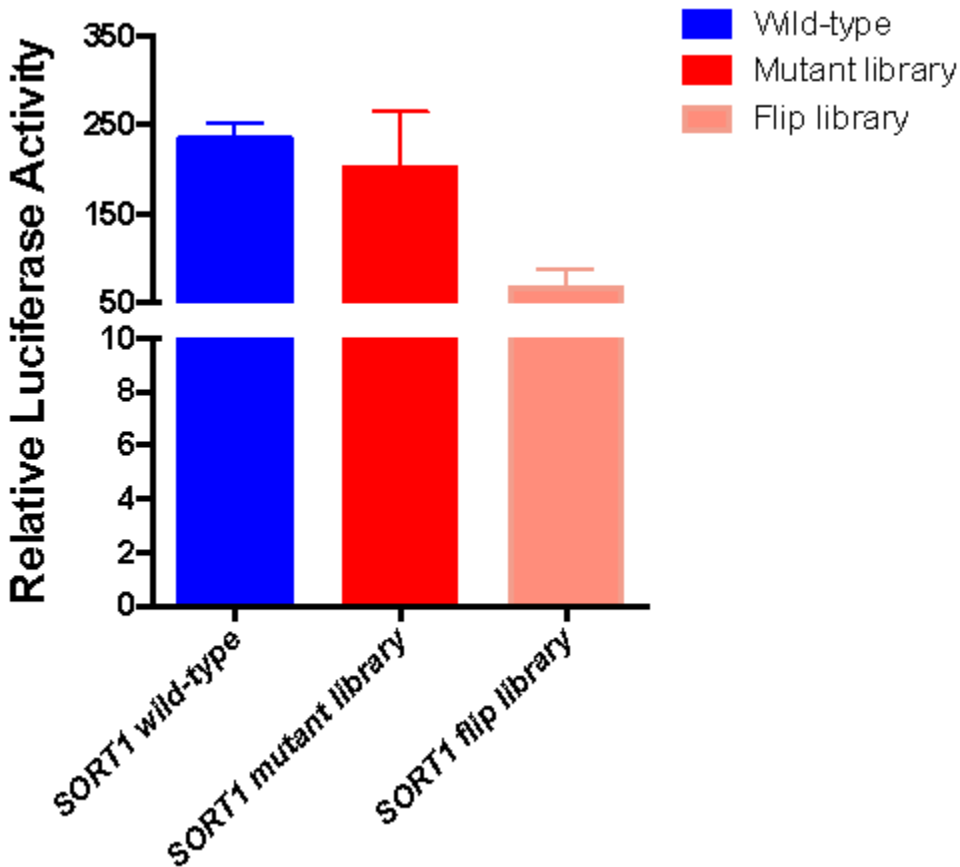

**SORT1 enhancer assays.** Bar charts representing the relative luciferase activity of the *SORT1* enhancer wild-type sequence (blue), mutant library (red) and flip library (light red). Luciferase levels were measured following 24 hour and results are plotted with mean  $\pm$  standard deviation of at least 3 independent experiments.

### Supplementary Figure 3

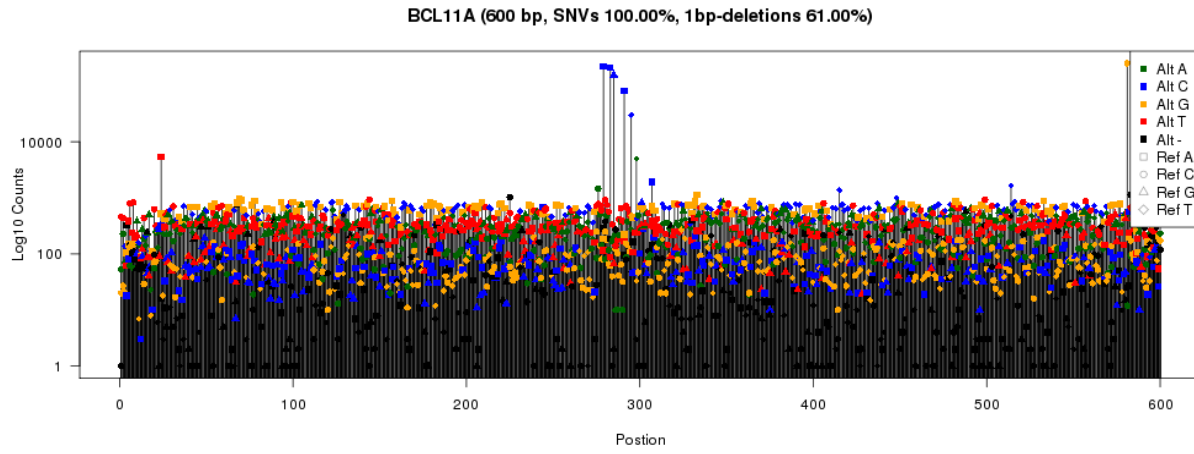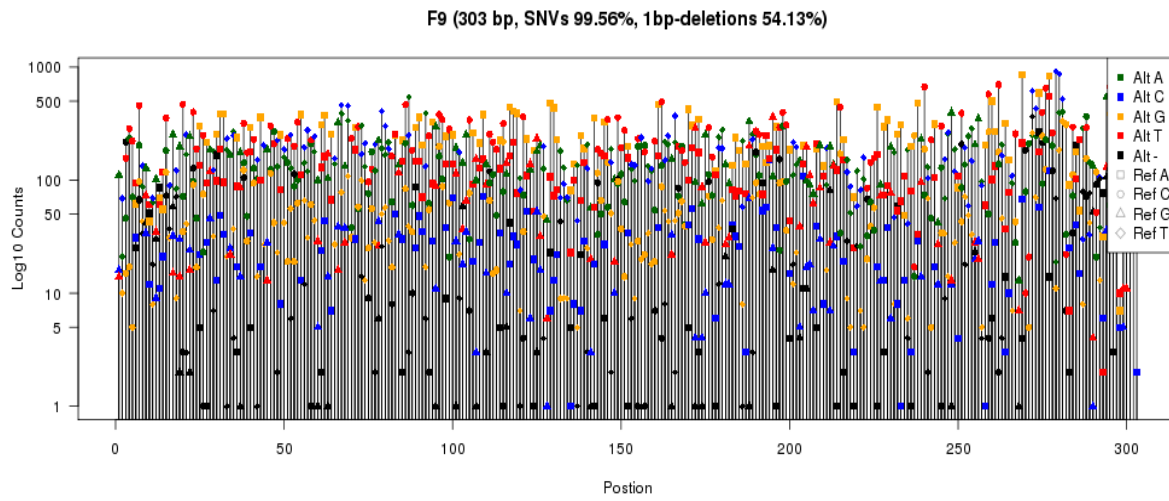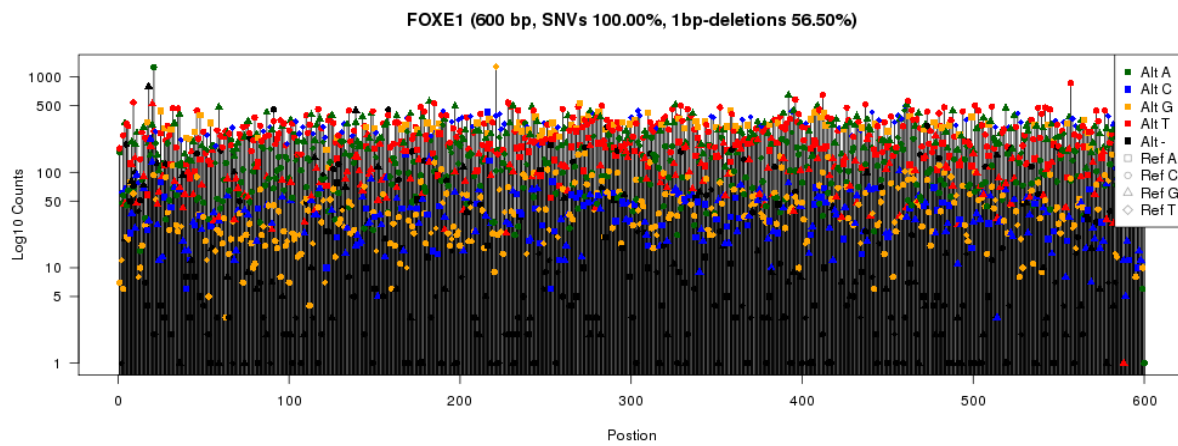



GP1BB (385 bp, SNVs 99.91%, 1bp-deletions 66.23%)

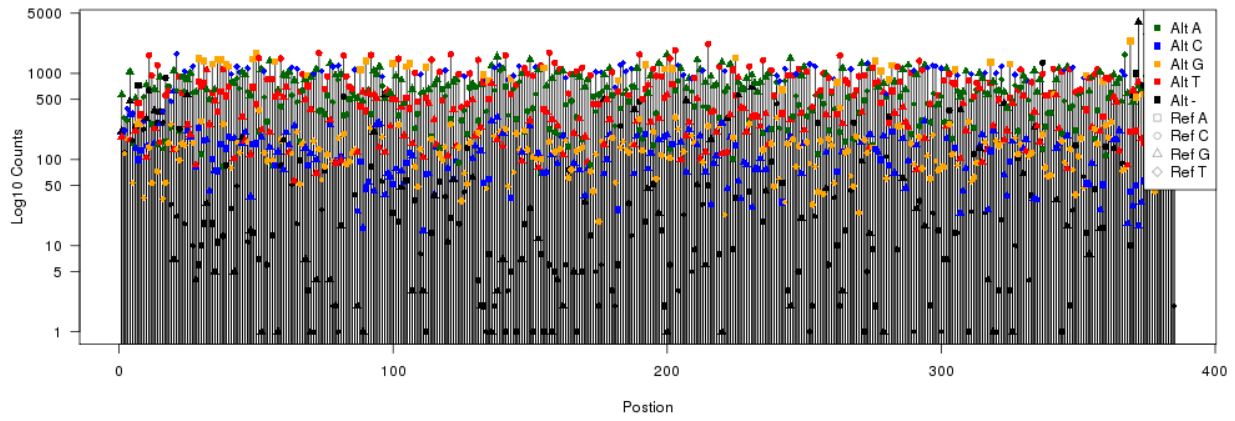

HBB (187 bp, SNVs 100.00%, 1bp-deletions 71.12%)

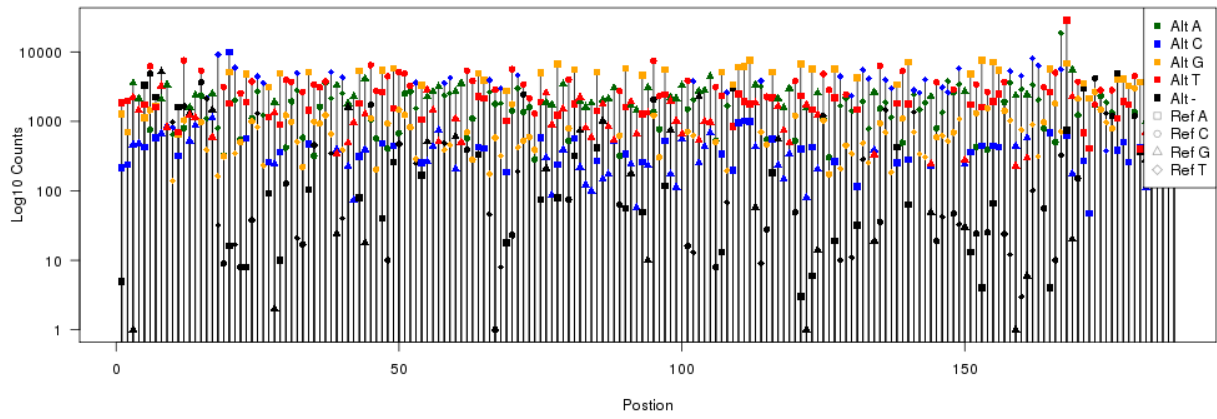

HBB1 (274 bp, SNVs 100.00%, 1bp-deletions 55.11%)

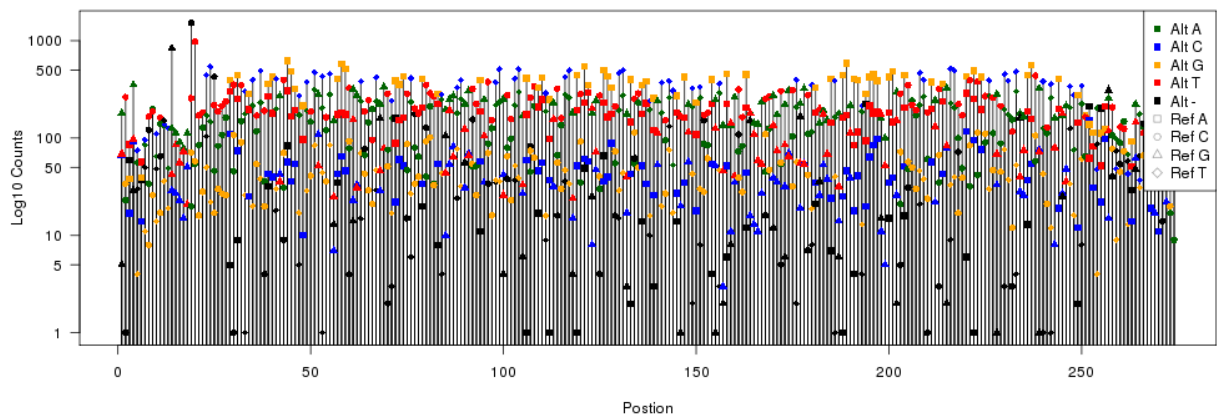

HNF4A (285 bp, SNVs 100.00%, 1bp-deletions 63.16%)

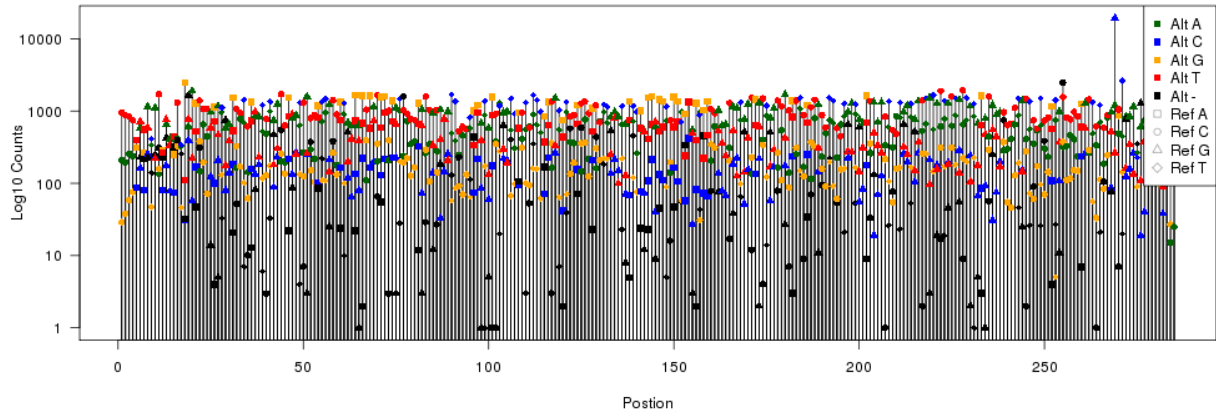

IRF4 (451 bp, SNVs 100.00%, 1bp-deletions 63.64%)

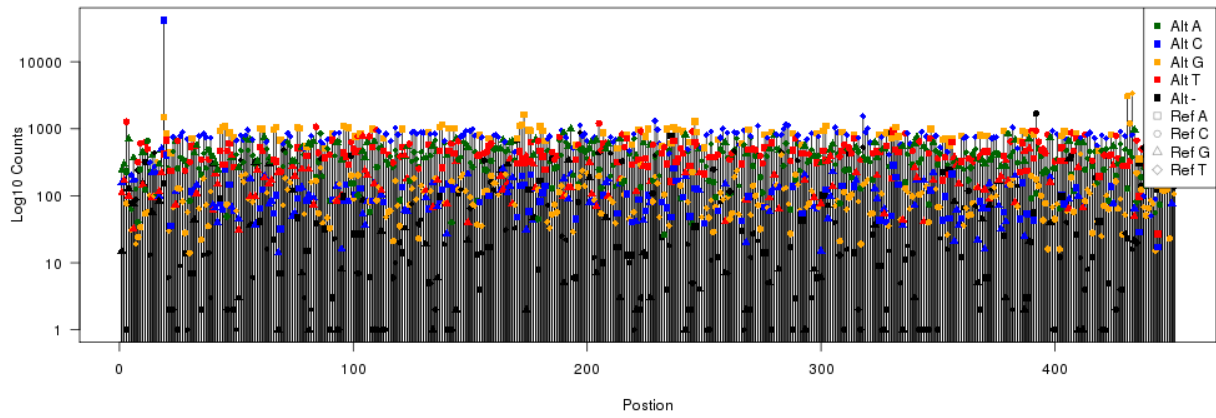

IRF6 (601 bp, SNVs 99.45%, 1bp-deletions 31.45%)

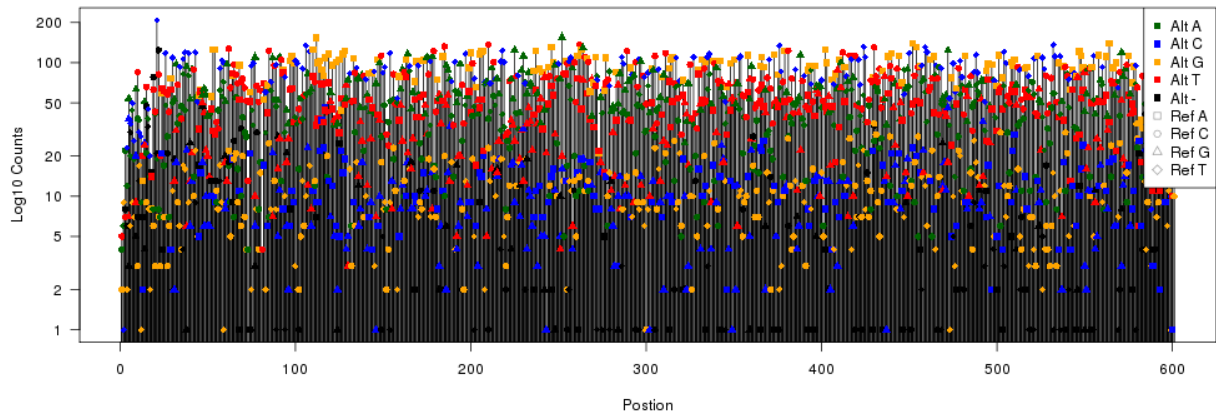

LDLR (318 bp, SNVs 100.00%, 1bp-deletions 58.81%)

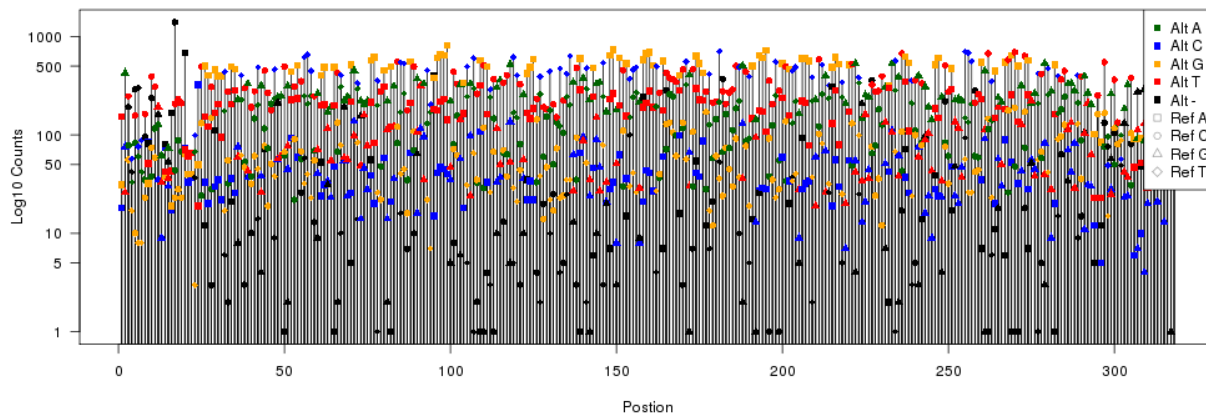

LDLR.2 (318 bp, SNVs 100.00%, 1bp-deletions 56.92%)

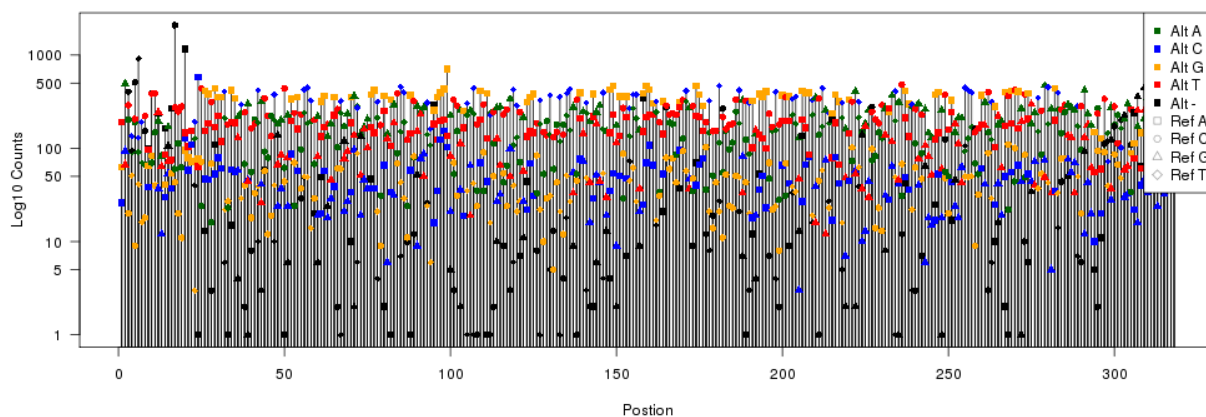

MSMB (593 bp, SNVs 100.00%, 1bp-deletions 67.12%)

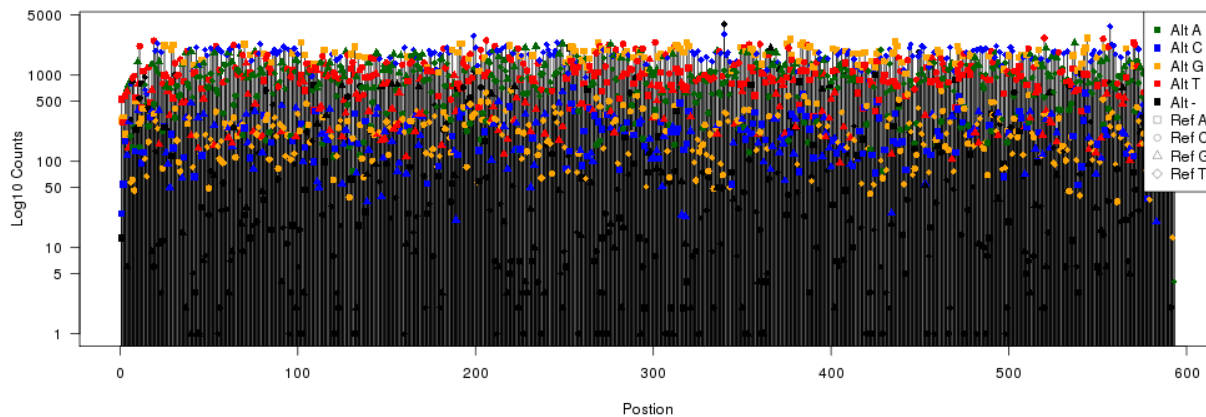

MYCrS6983267 (600 bp, SNVs 99.67%, 1bp-deletions 43.33%)

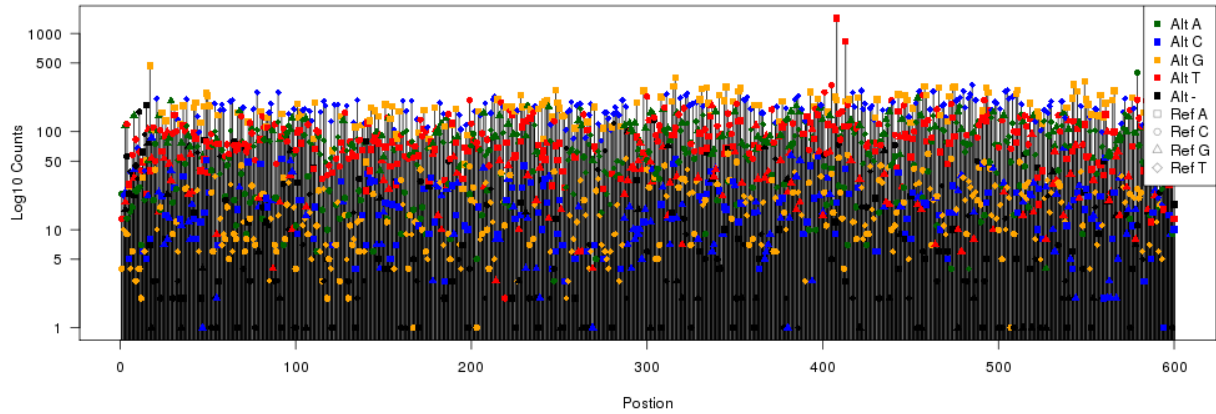

MYCrS11986220 (464 bp, SNVs 100.00%, 1bp-deletions 55.39%)

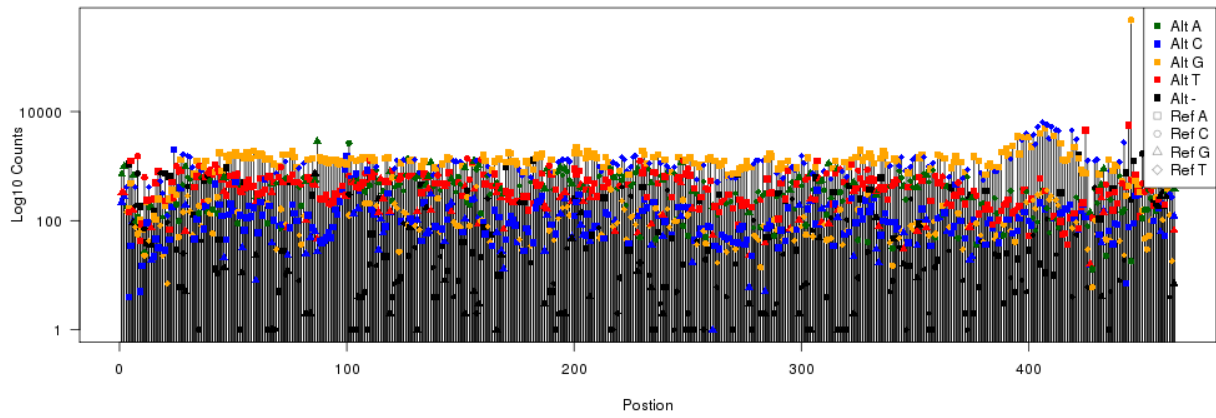

PKLR (470 bp, SNVs 99.93%, 1bp-deletions 45.74%)

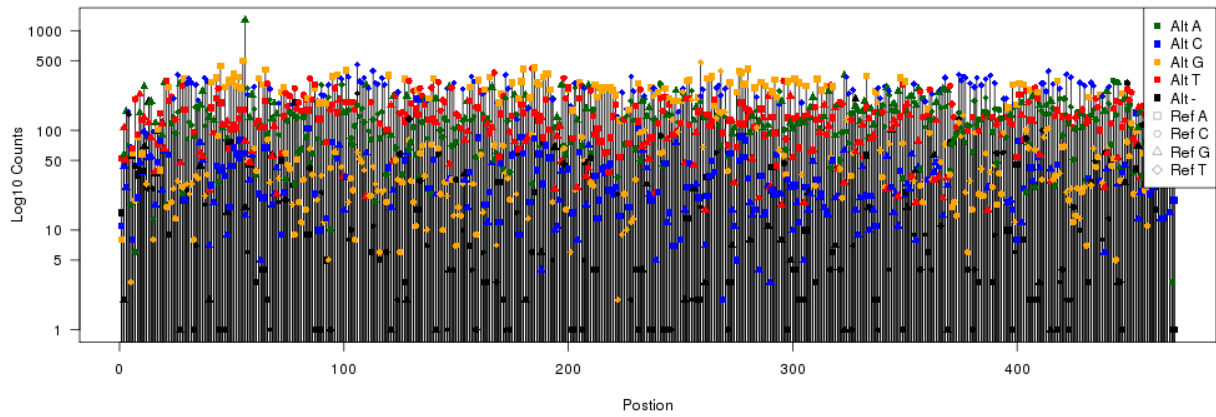

RET (600 bp, SNVs 99.94%, 1bp-deletions 55.50%)

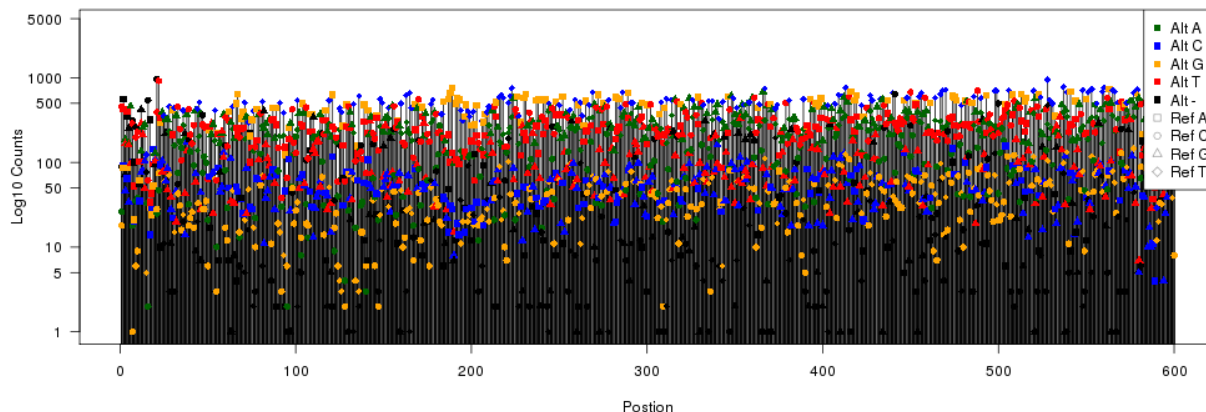

SORT1 (600 bp, SNVs 99.72%, 1bp-deletions 41.67%)

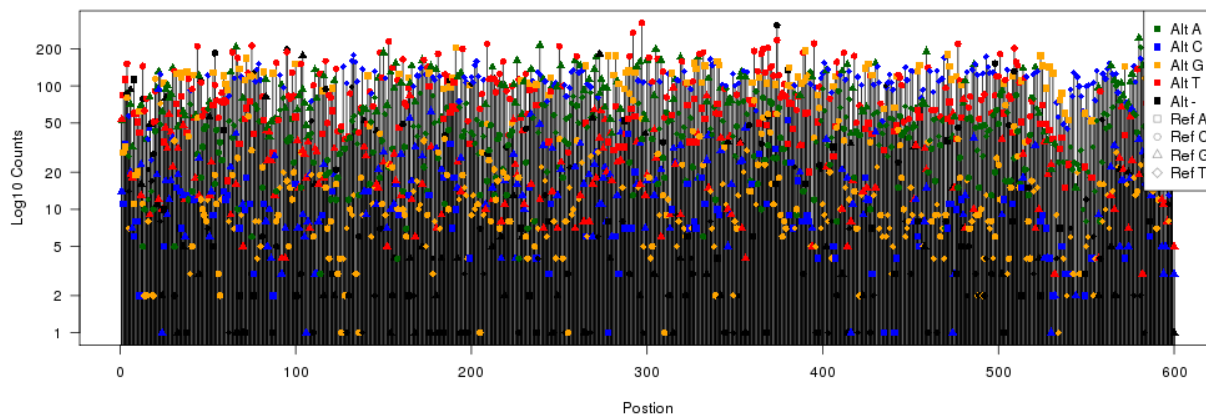

SORT1.2 (600 bp, SNVs 99.94%, 1bp-deletions 49.83%)

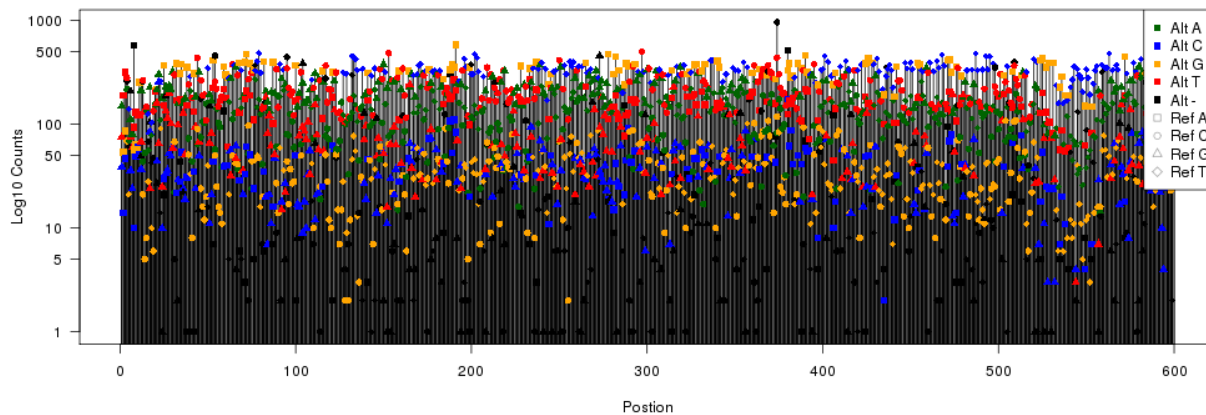

**SORT1-flip (600 bp, SNVs 99.61%, 1bp-deletions 50.83%)**

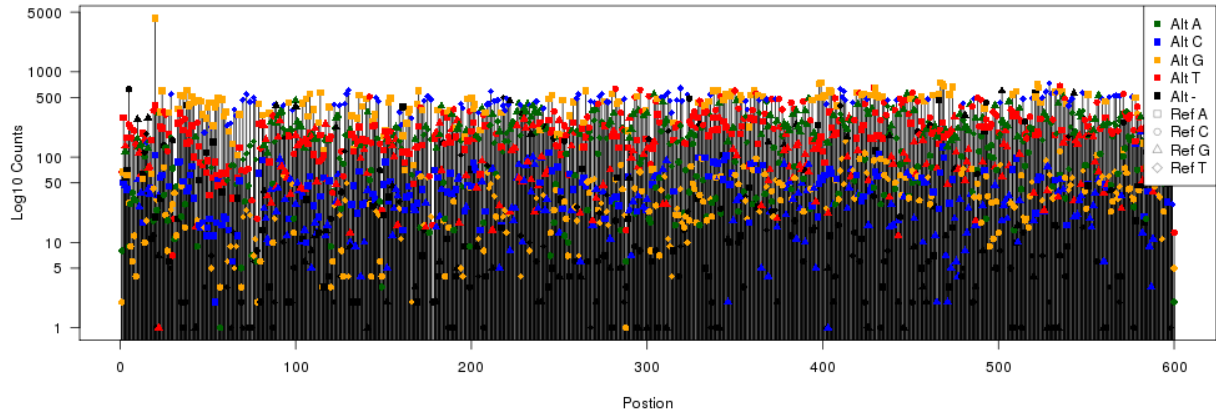

**TCF7L2 (600 bp, SNVs 99.06%, 1bp-deletions 42.33%)**

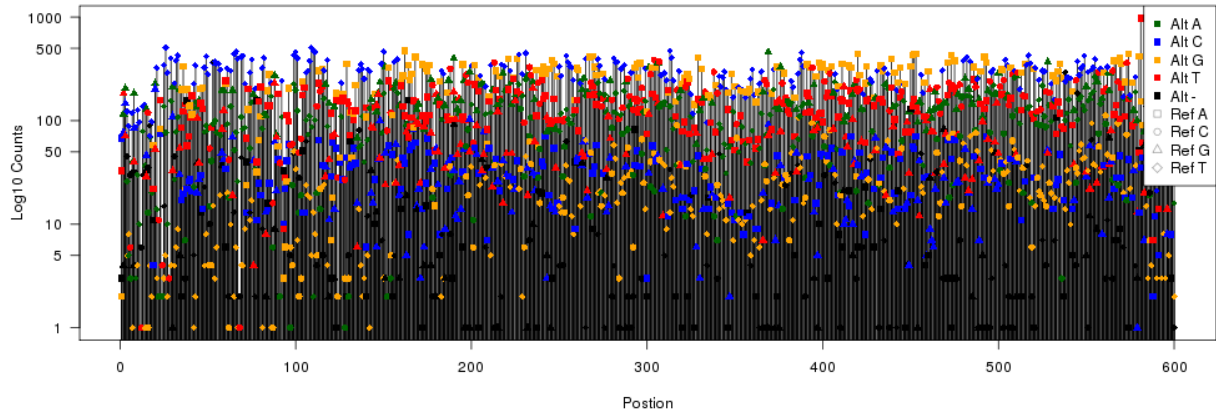

**TERT (259 bp, SNVs 100.00%, 1bp-deletions 57.53%)**

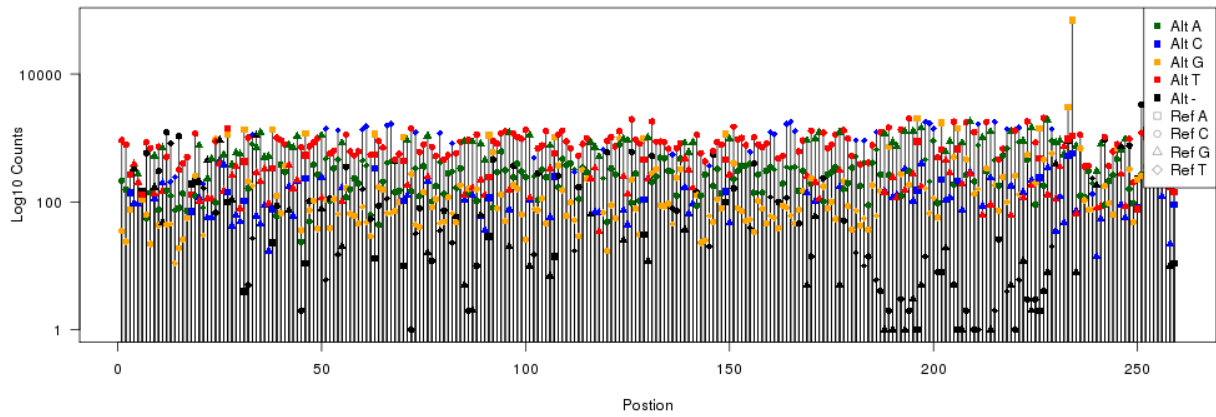

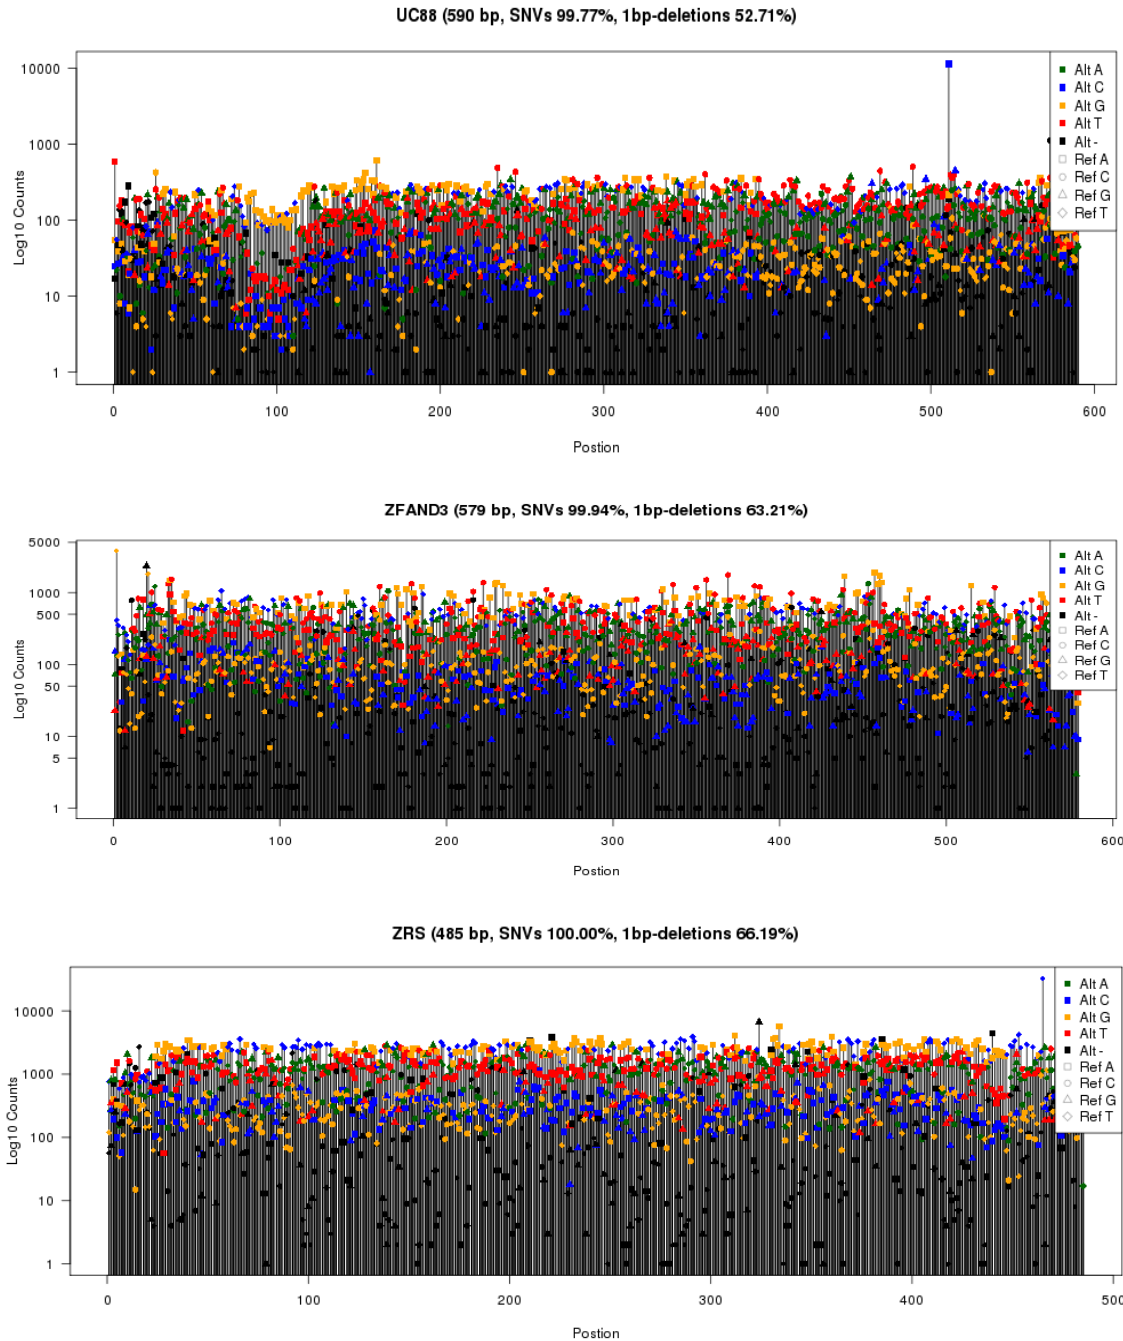

**Tags assigned from saturation mutagenesis libraries.** Plots for all 24 assignments described in Supplementary Table 3. Variants are sampled evenly across all the regions. The number of tags per variant follows previously characterized biases in error-prone PCR using Taq polymerase, with a preference of transitions over transversions and T-A preference among transversions. Insertions were rare, while short deletions occur at rates similar to those of the rare transversions. Shape denotes the reference and the color the alternative allele of the variant. The “-” in the legend stands for a 1 bp deletion.

## Supplementary Figure 4

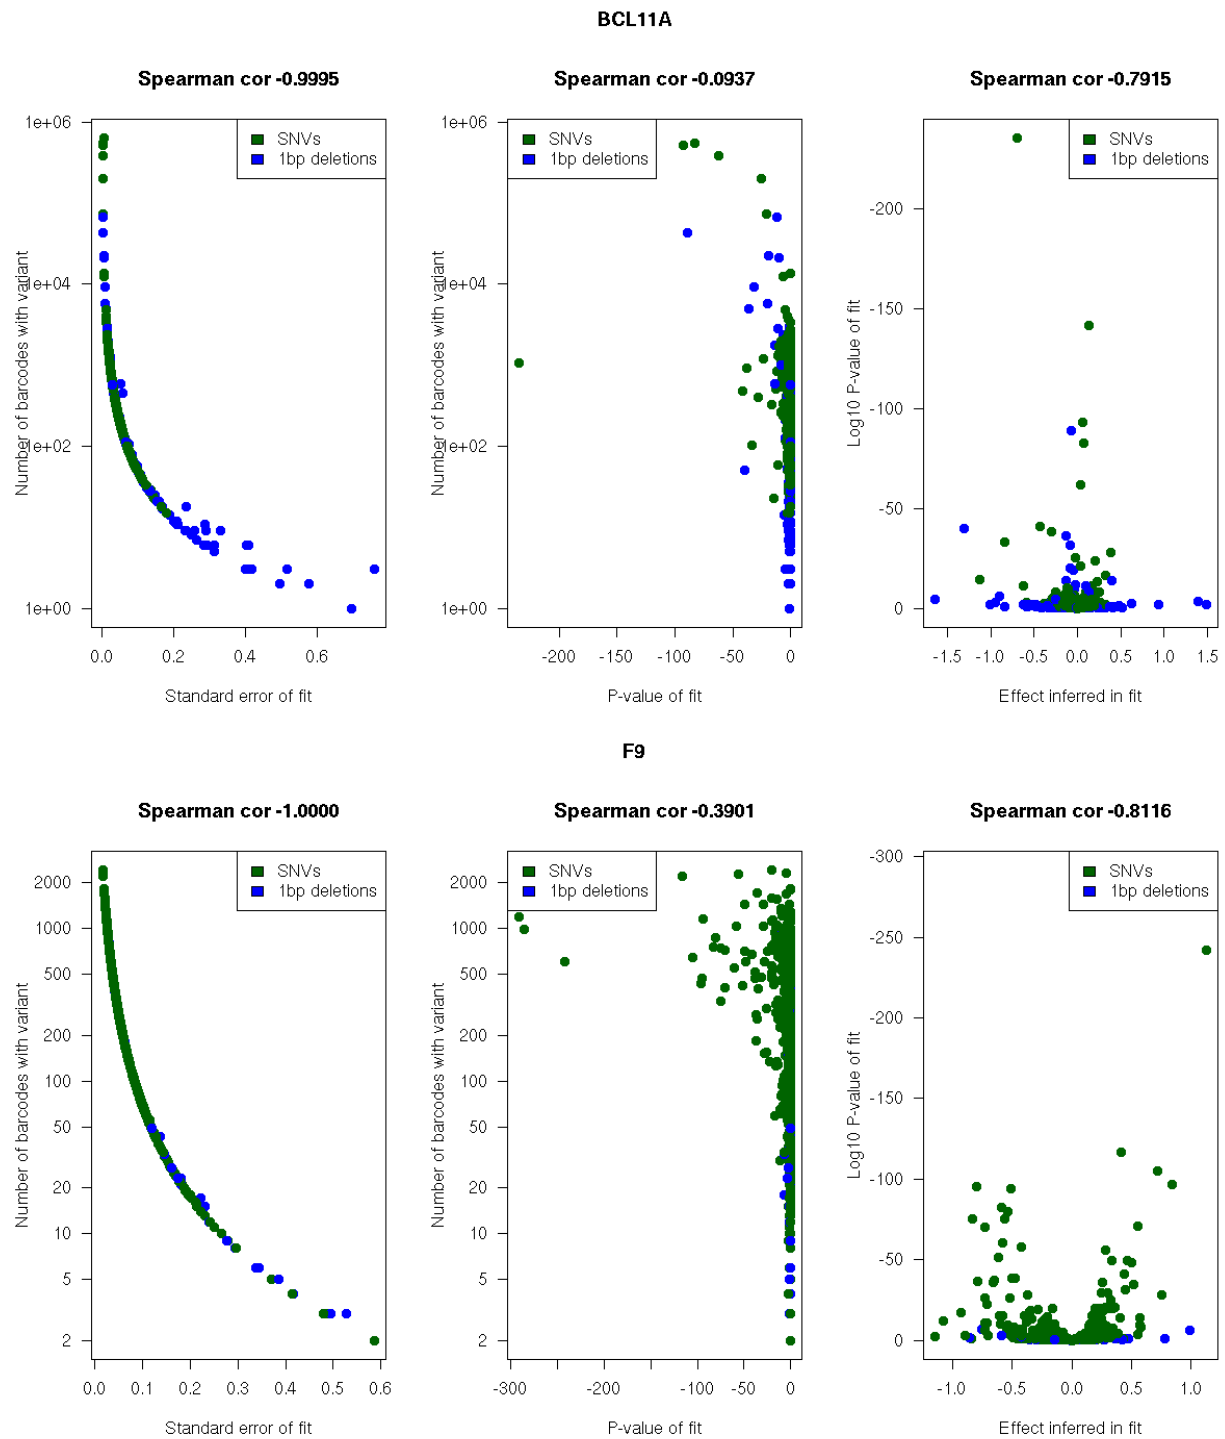



**FOXE1**

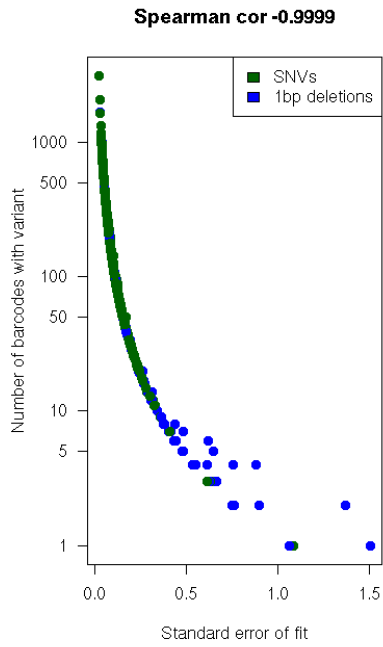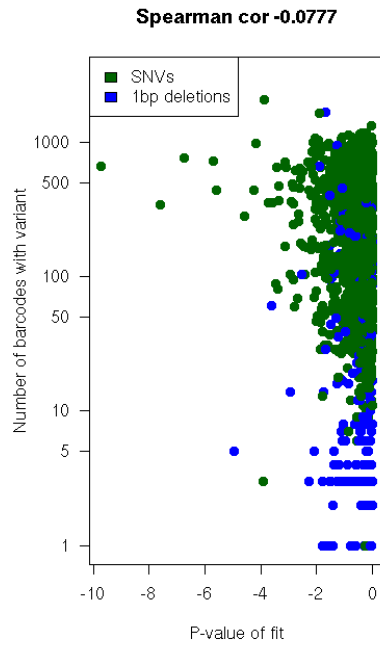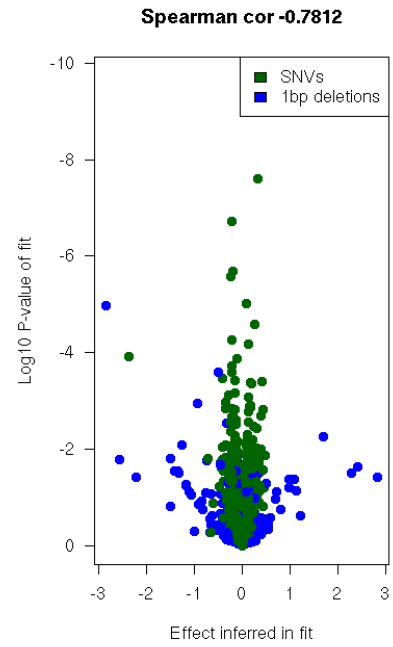

**GP1BB**

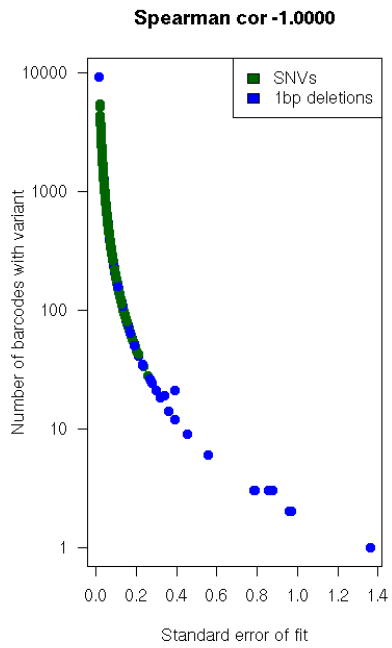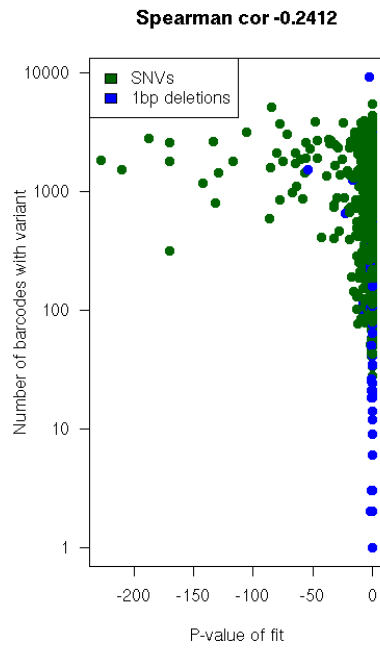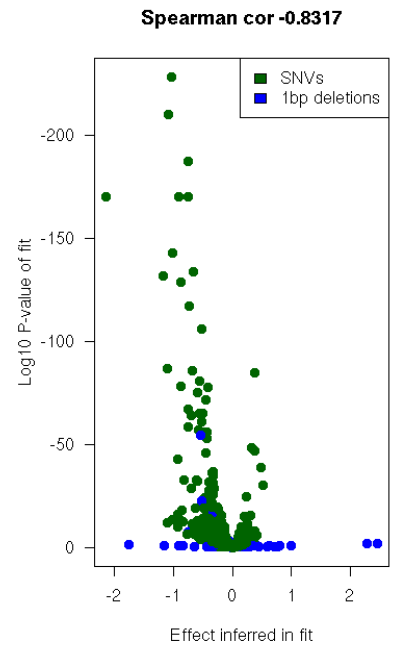

### HBB

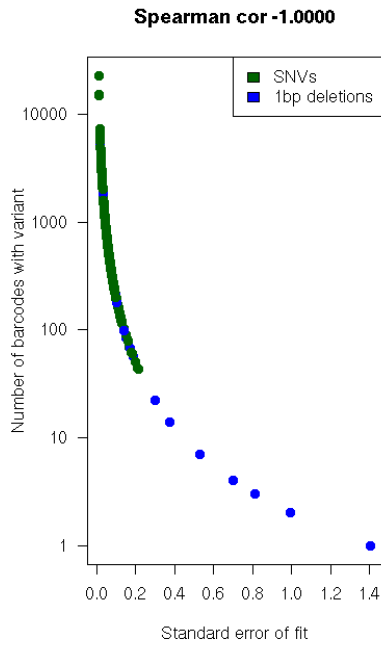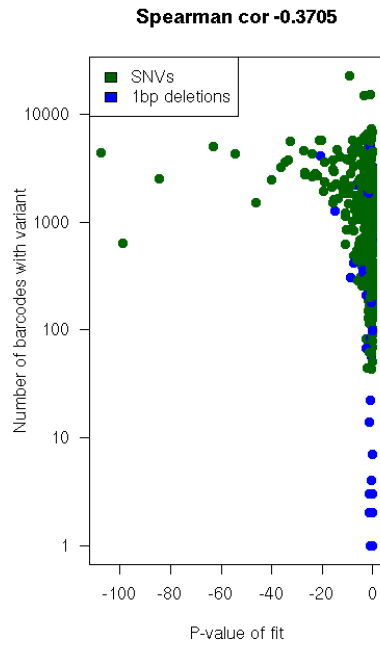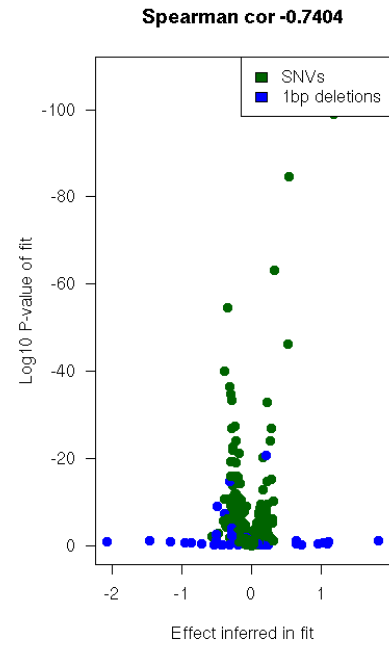

### HBB1

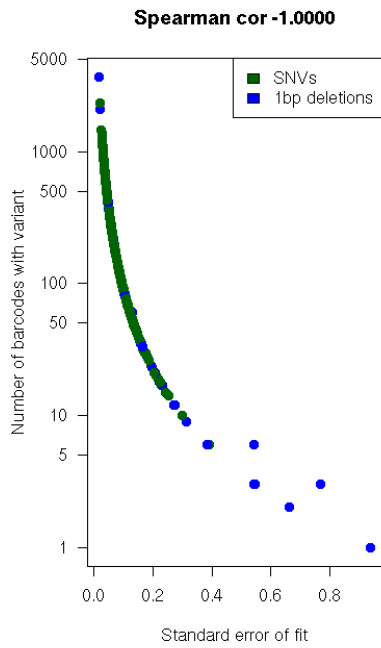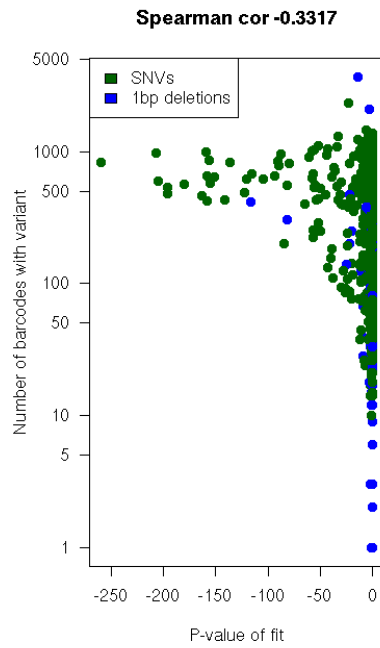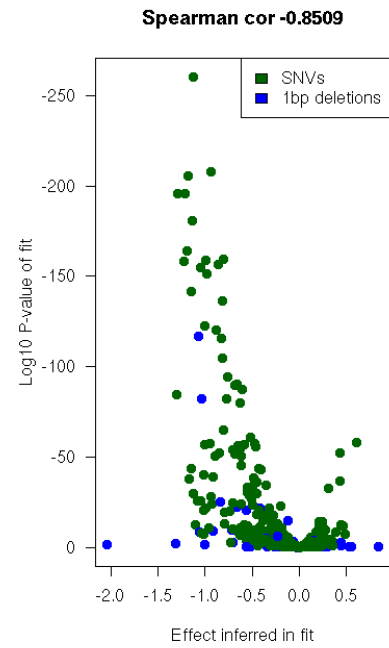

### HNF4A

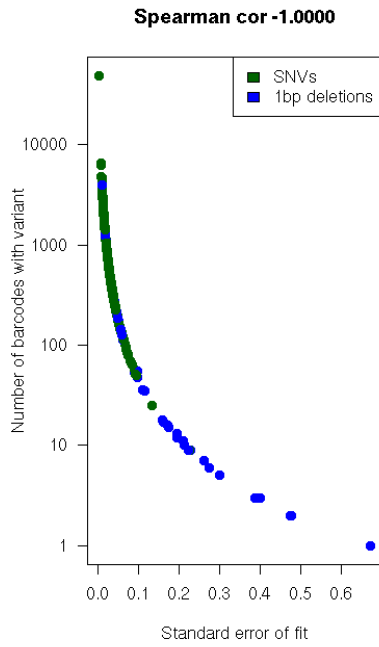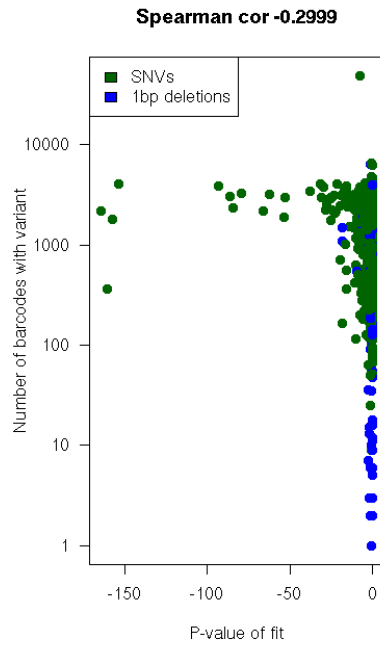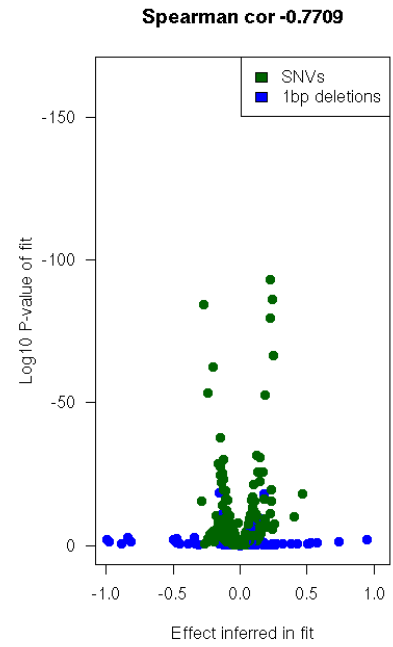

### IRF4

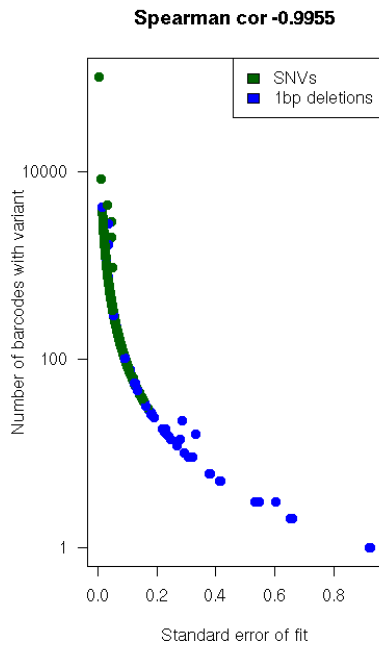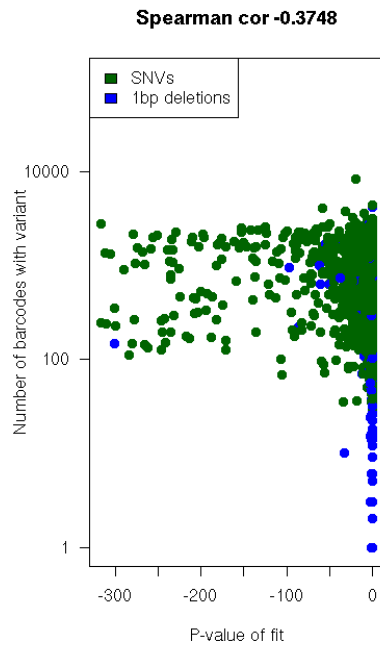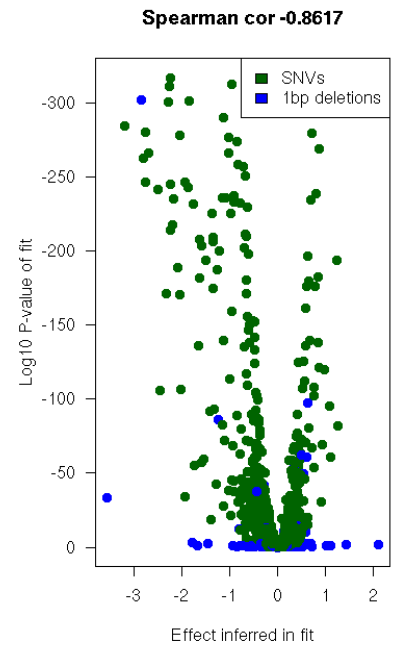

**IRF6**

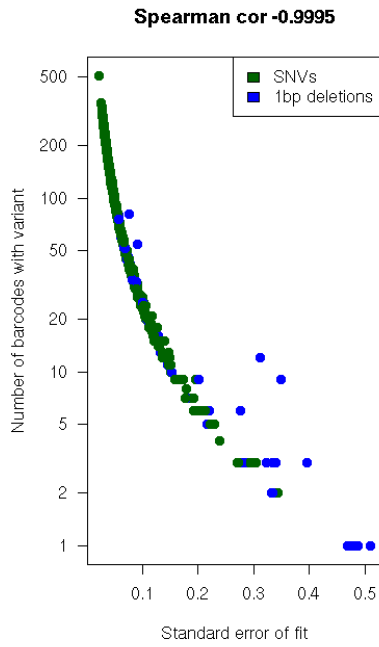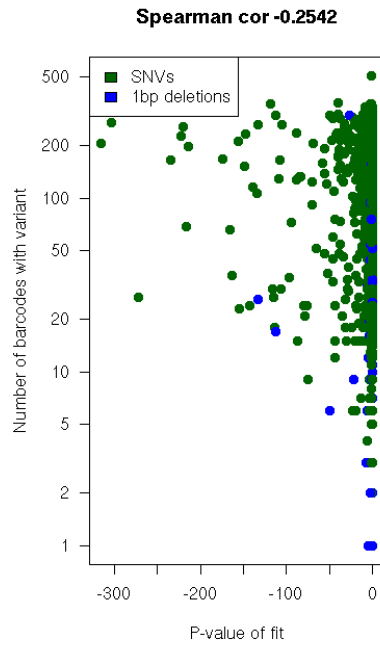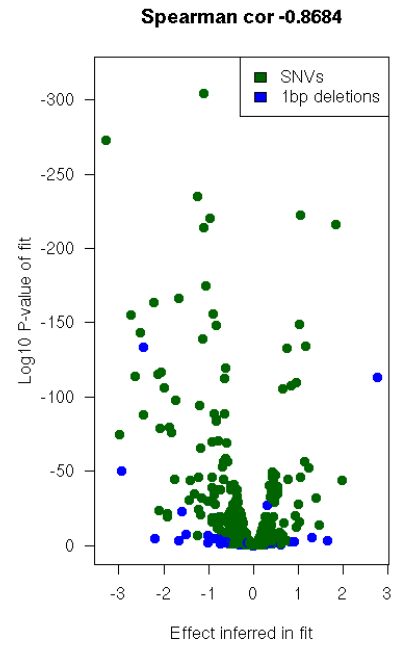

**LDLR.2**

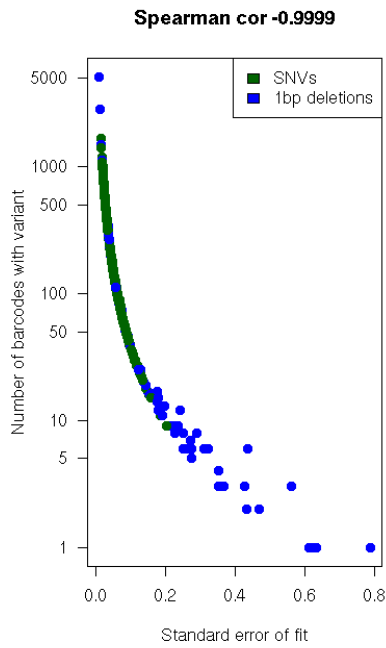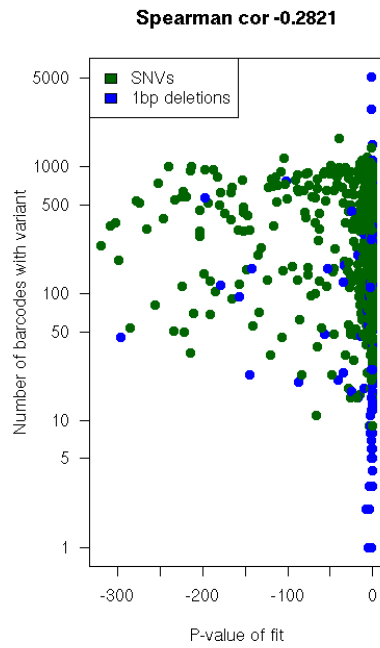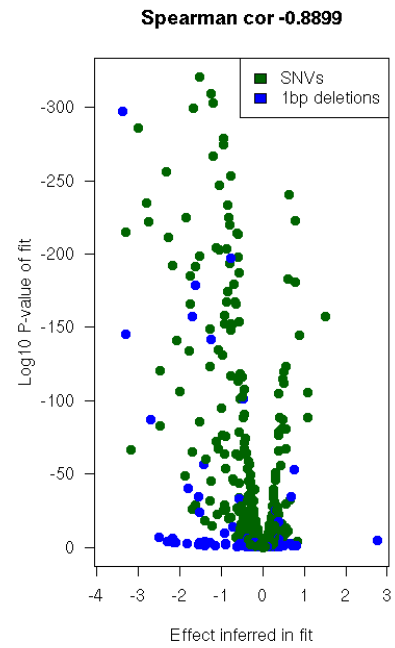

**LDLR**

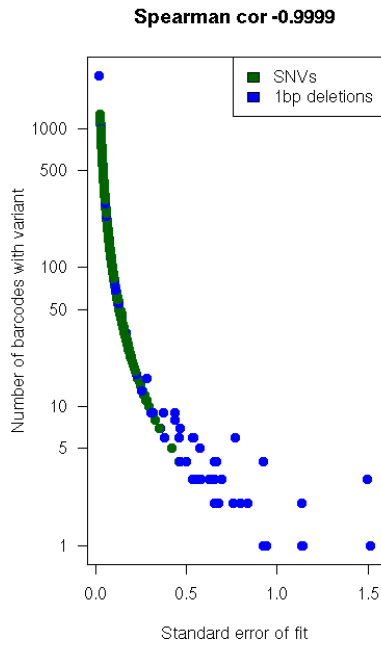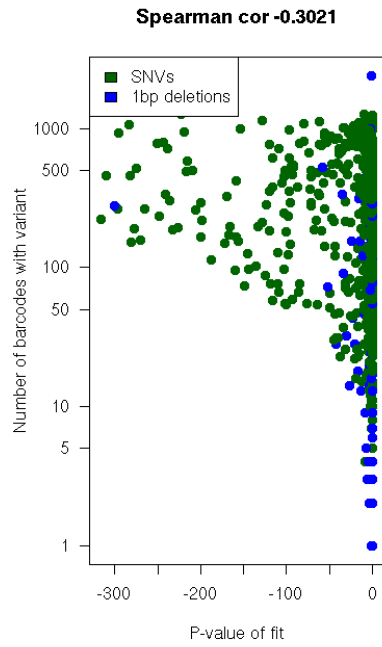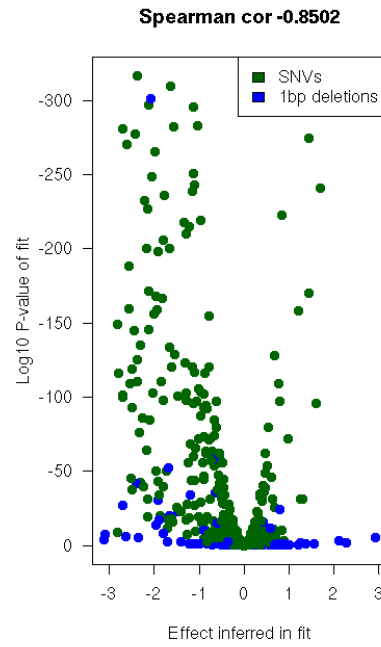

**MSMB**

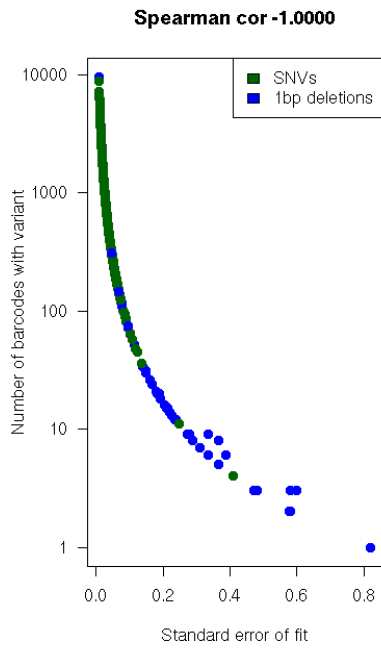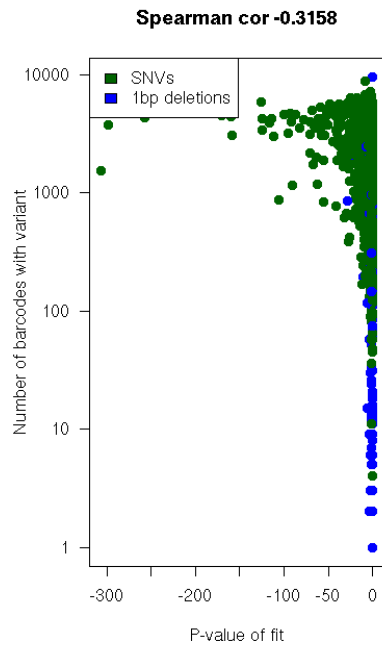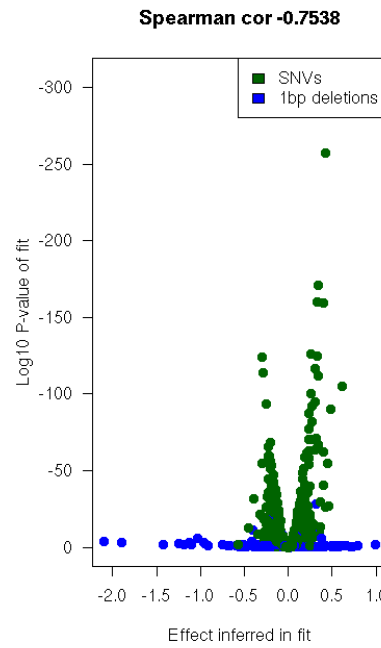

**MYCrS6983267**

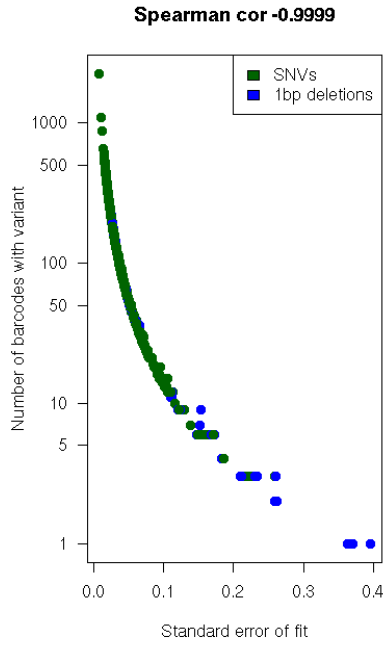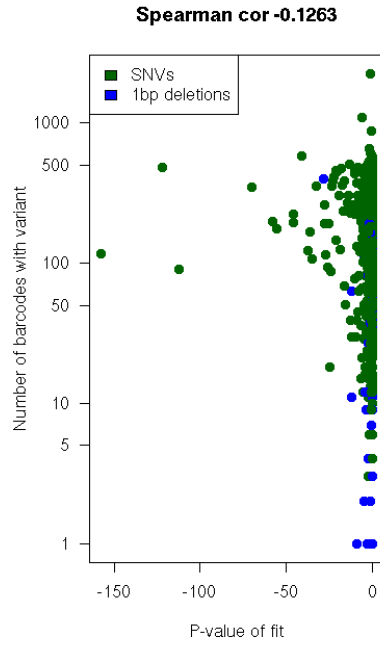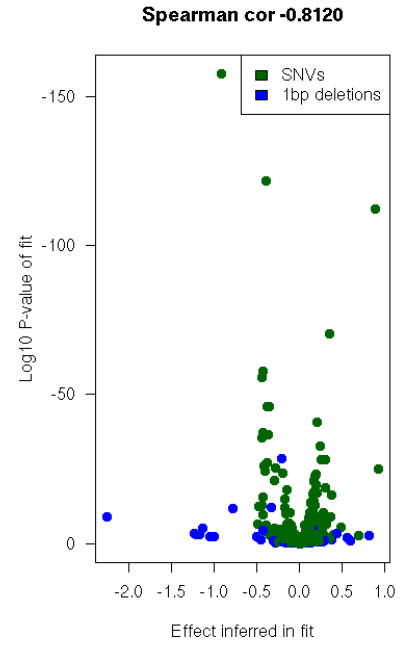

**MYCrS11986220**

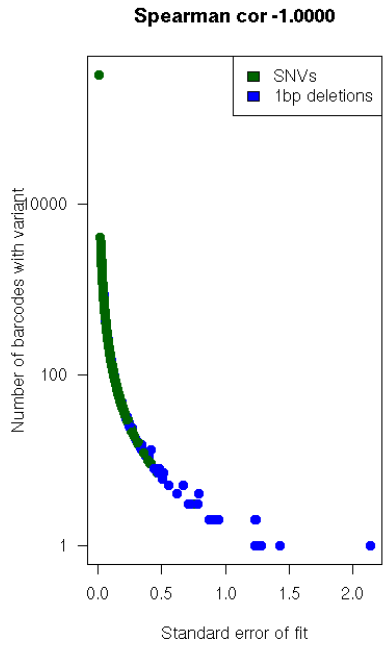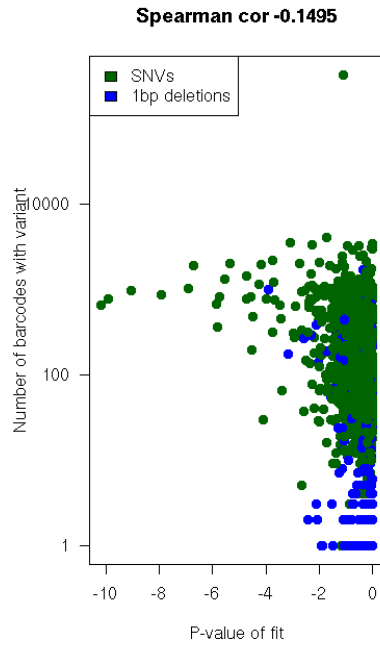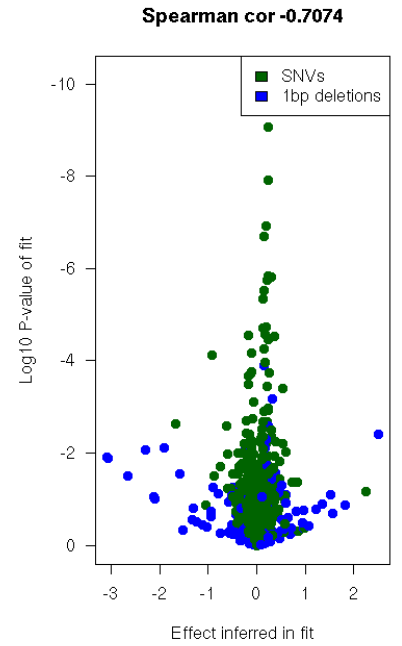

PKLR\_24h

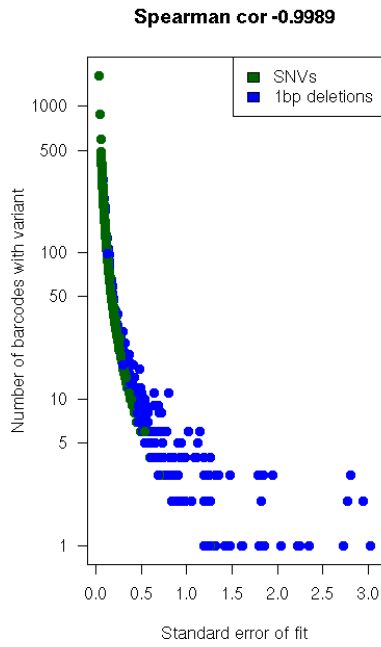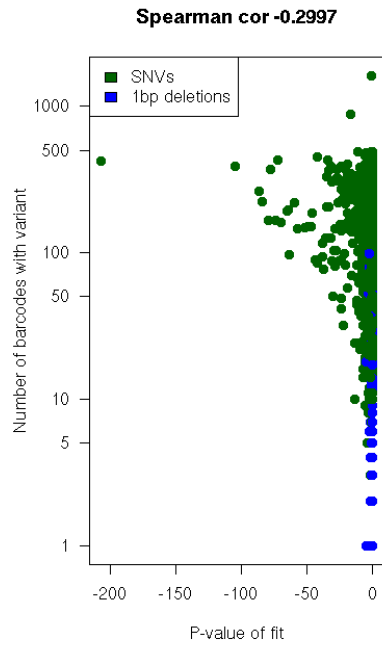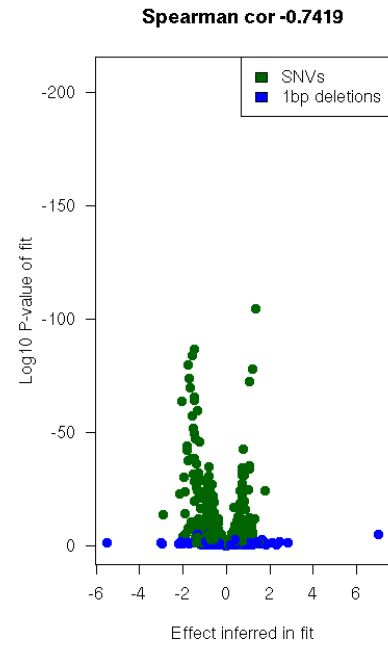

PKLR\_48h

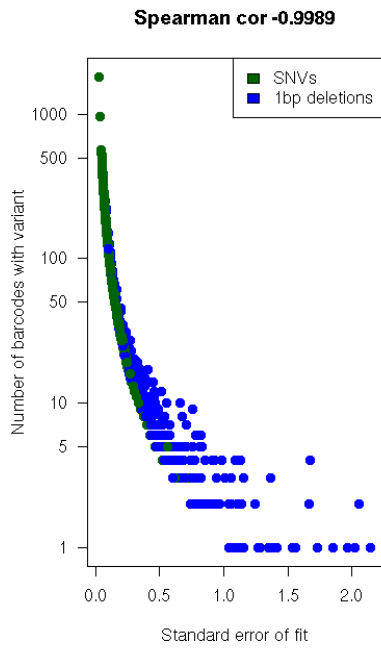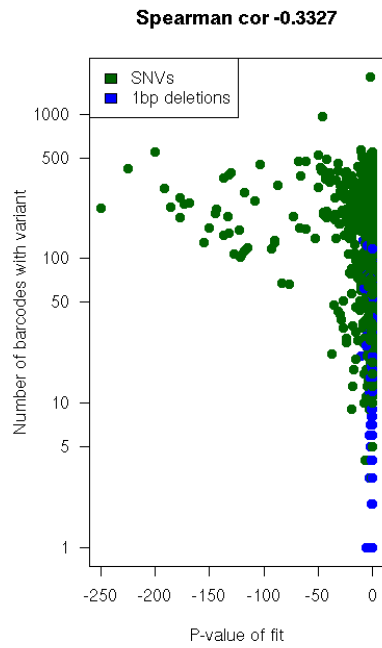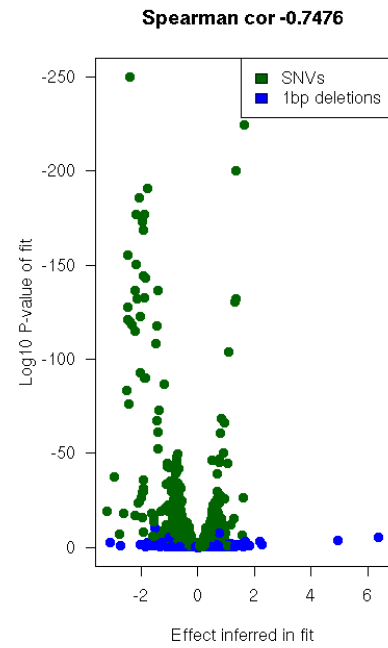

RET

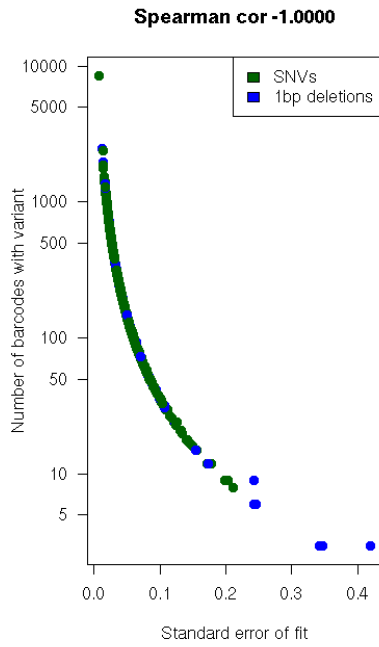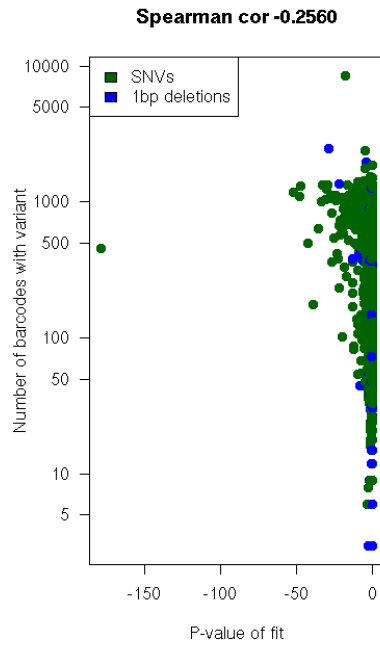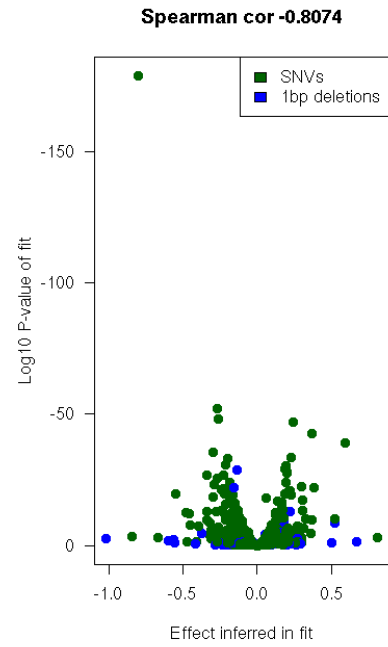

SORT1.2

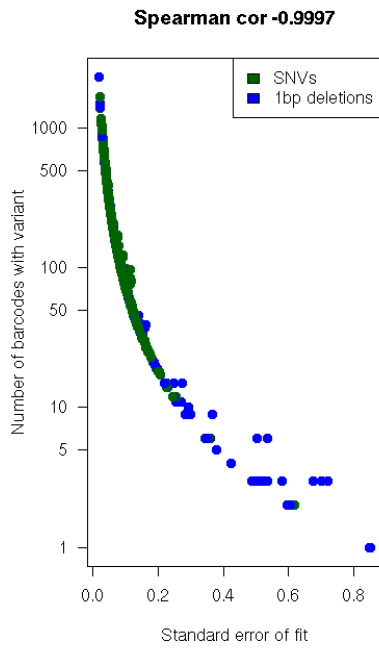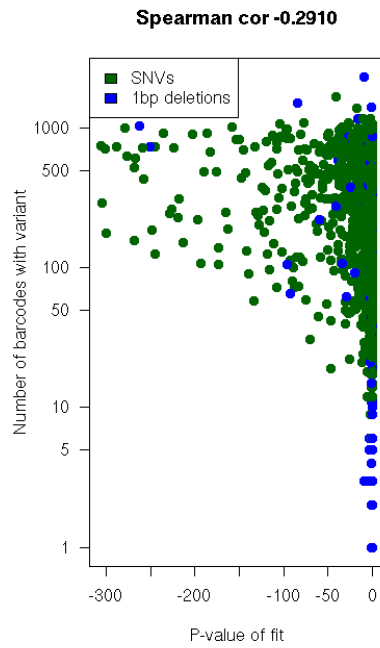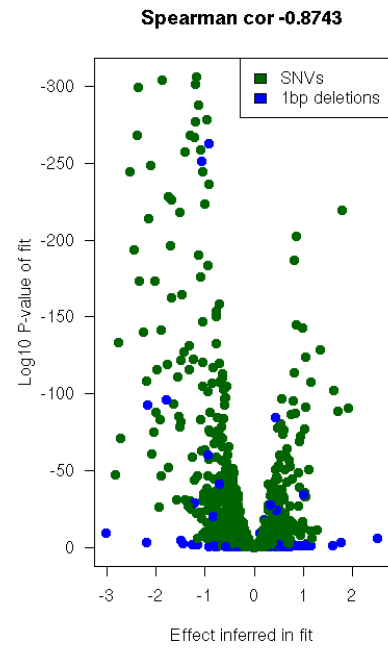



### SORT1

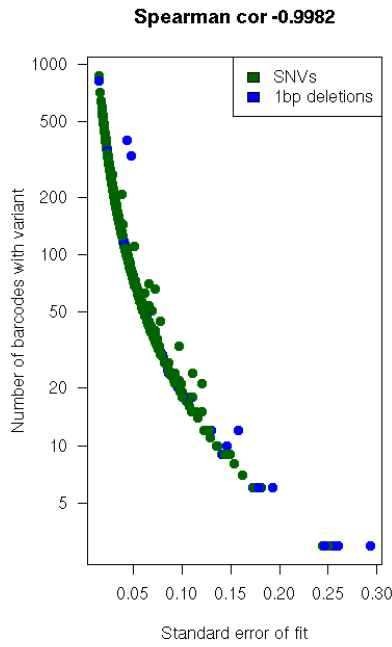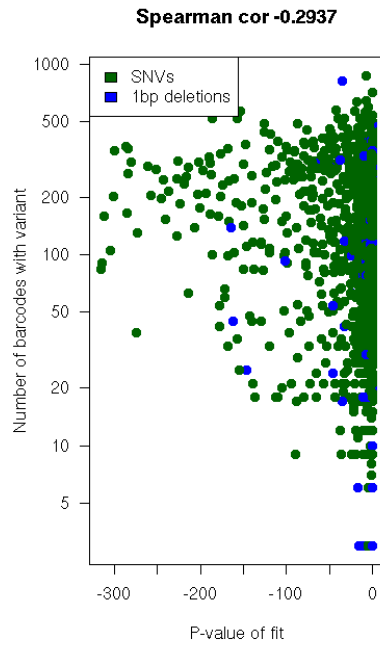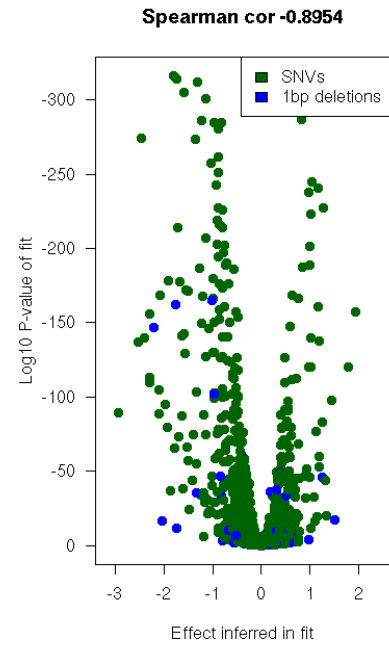

### SORT1-flip

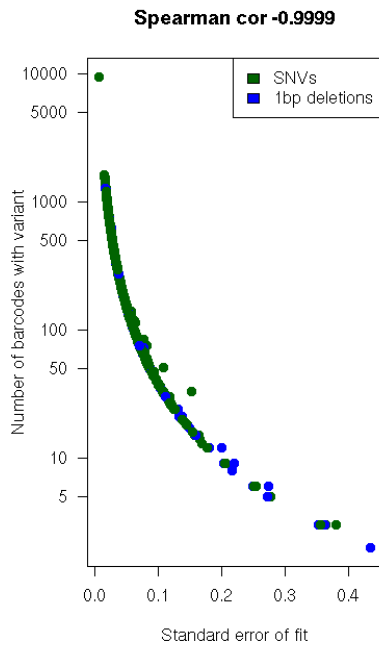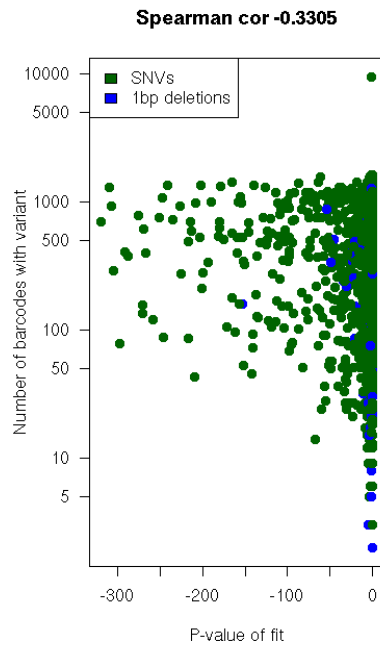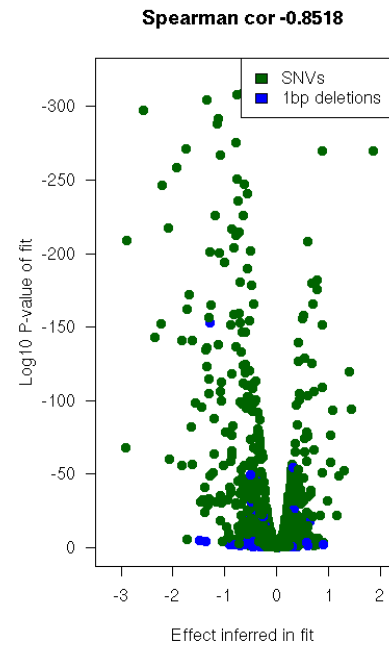

**TCF7L2**

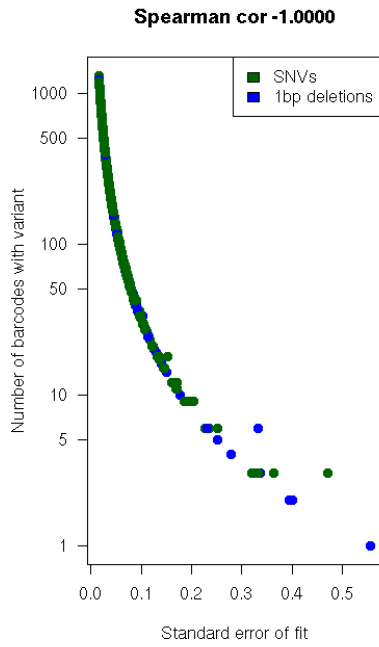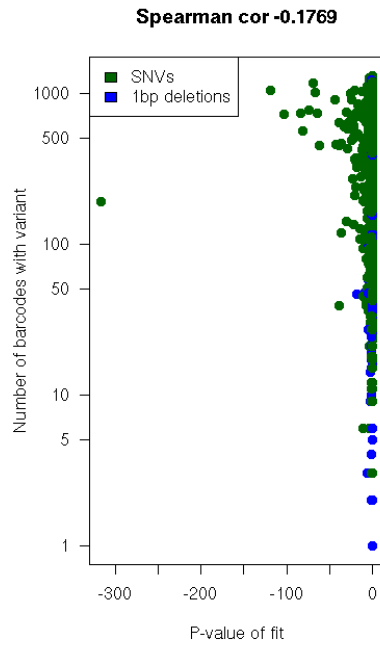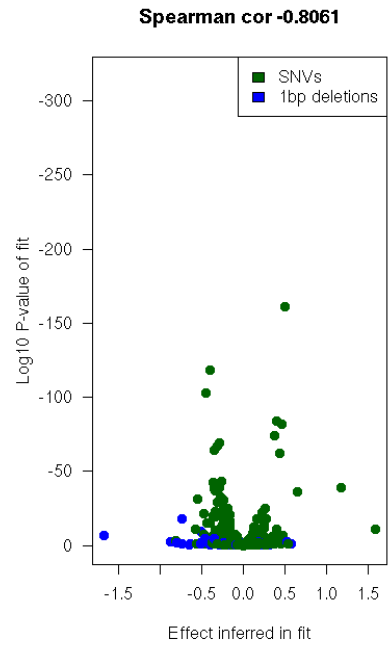

**TERT**

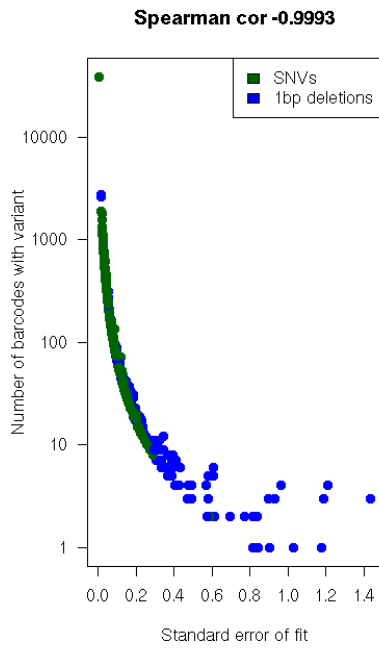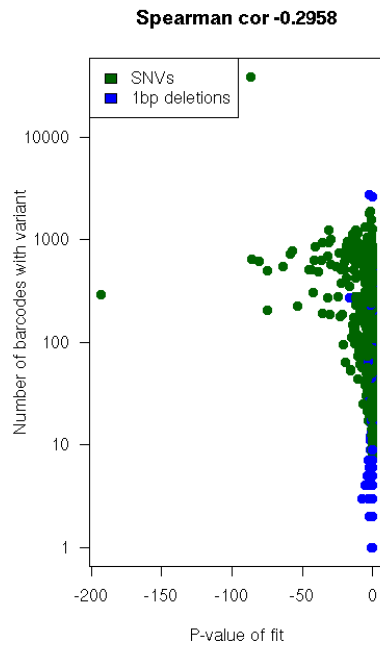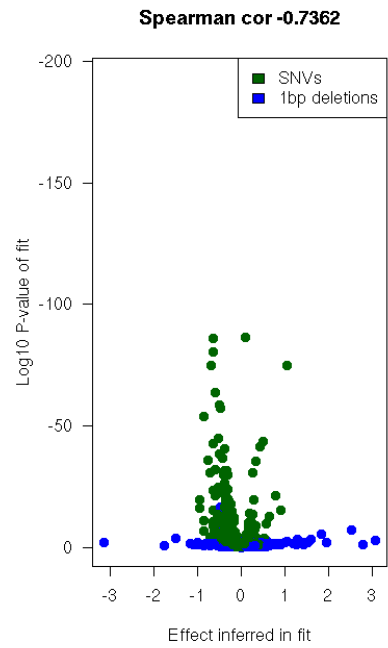

NoPert\_TERT

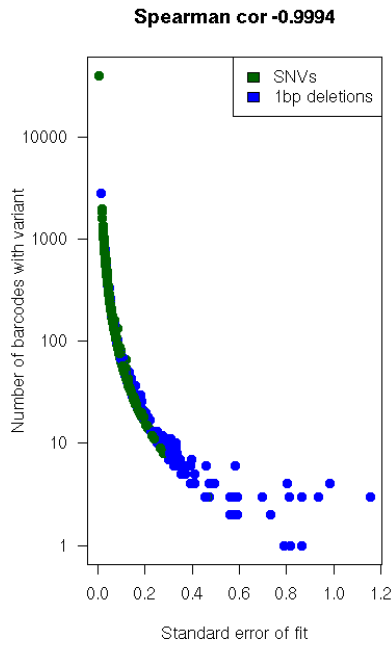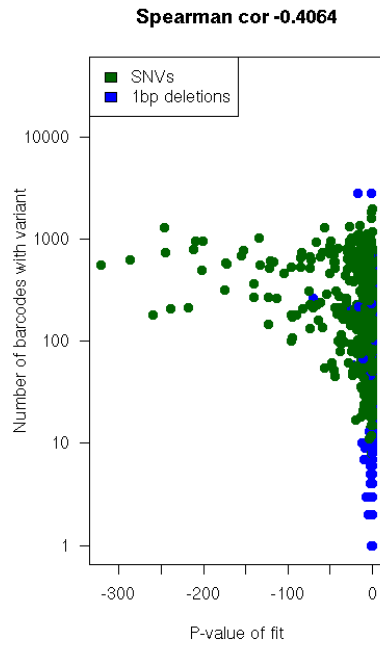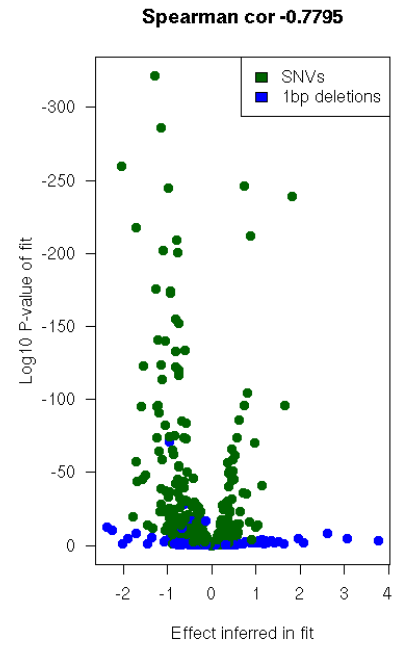

SiGABPA\_TERT

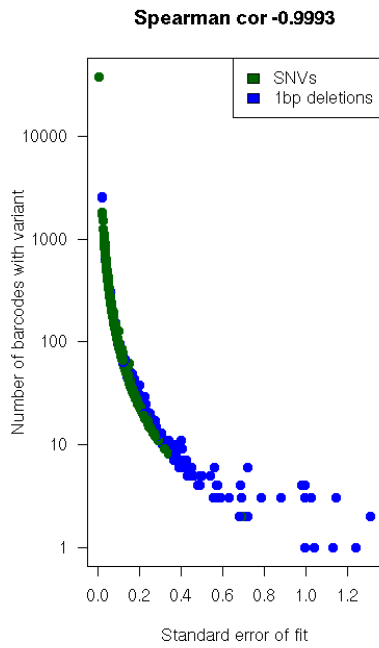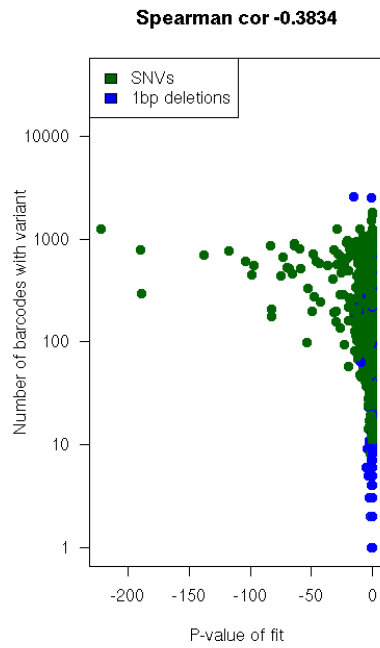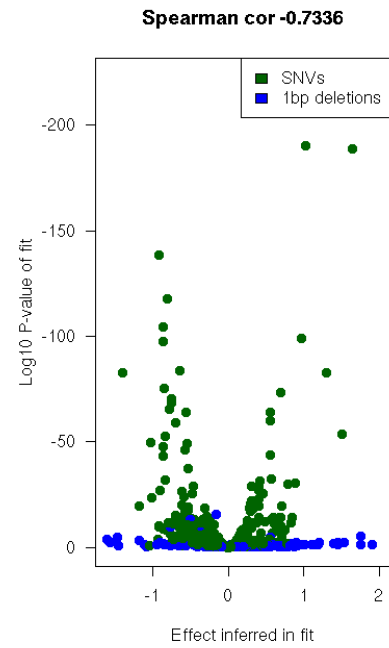

SiScramble\_TERT

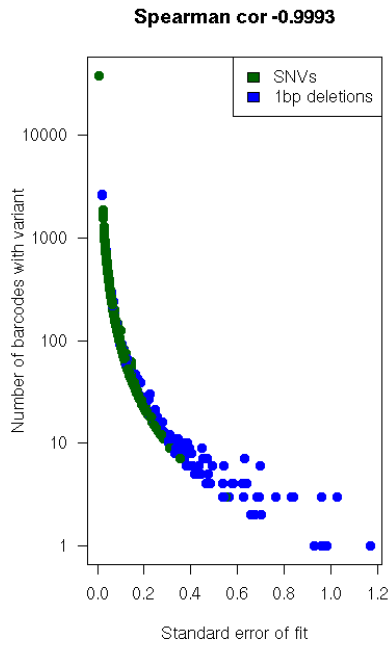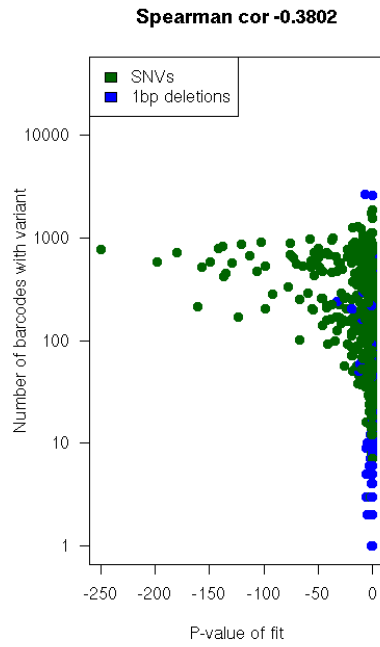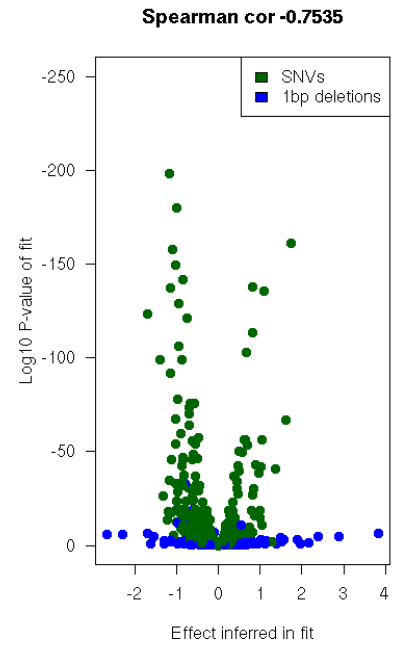

UC88

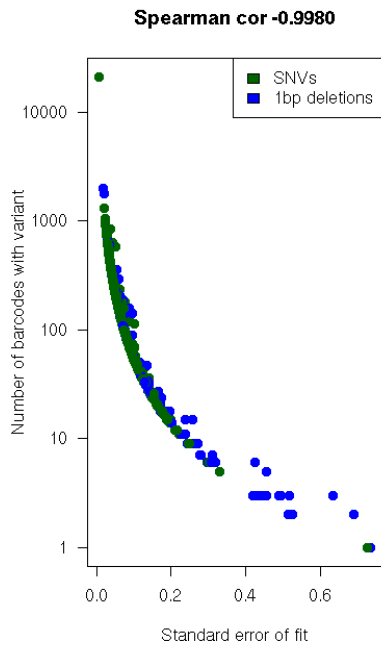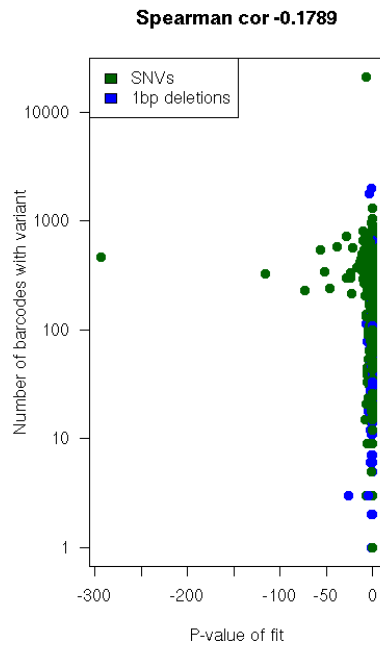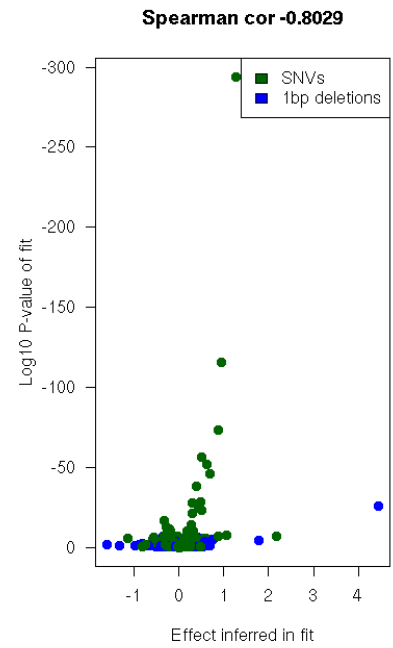

ZFAND3

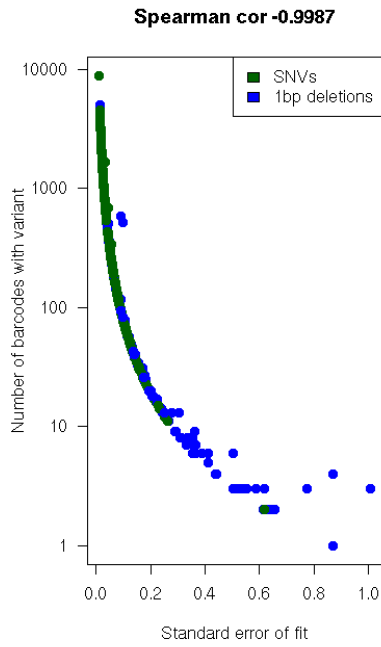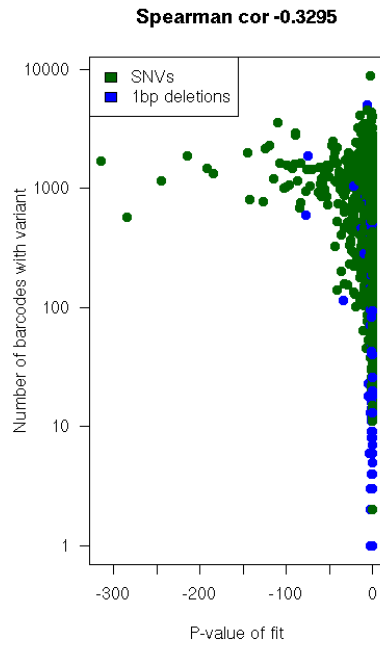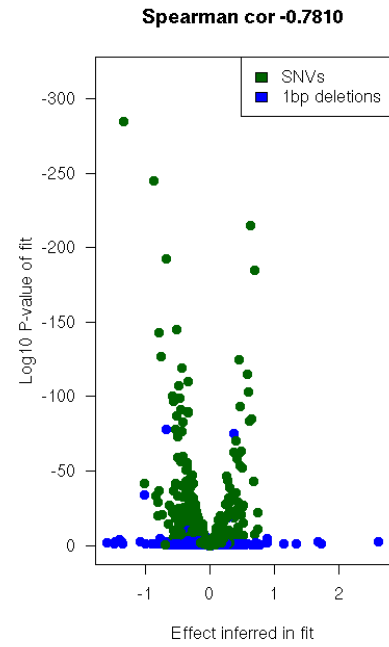

ZRSh13

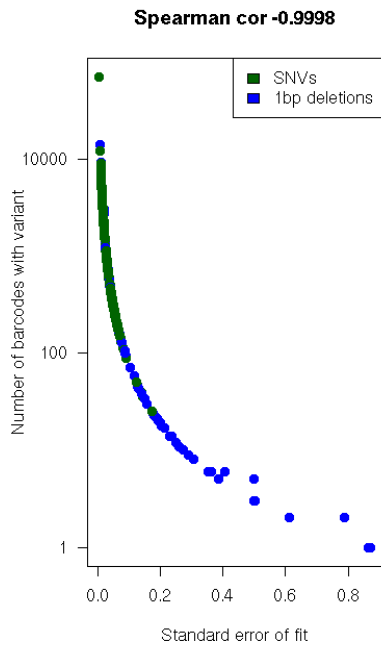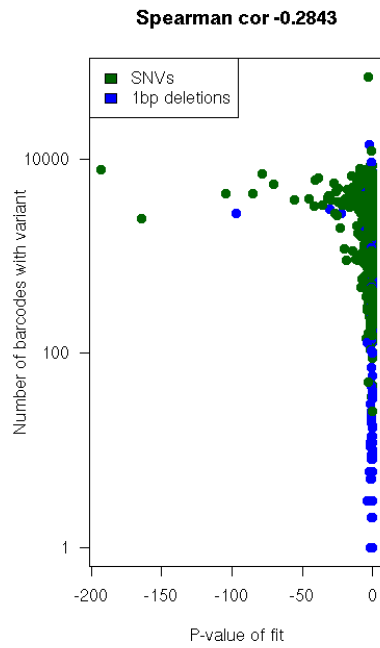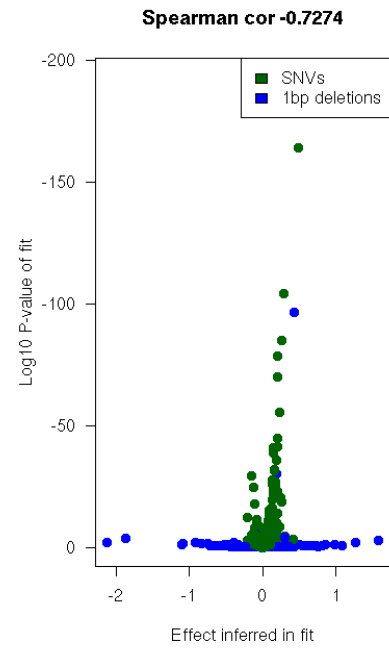

### ZRSh13h2

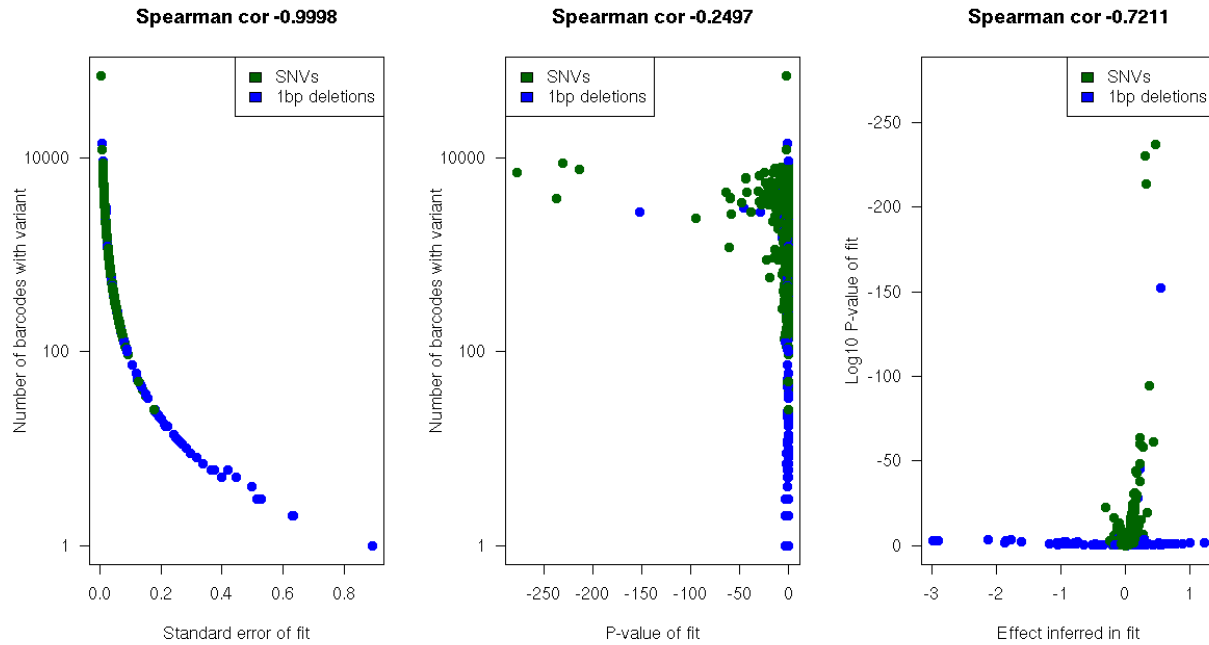

**Quality of fit measures for variant effects determined by 29 linear regression models.** For the 29 experiments (combining three technical replicates each), the left panel shows the standard error of the variant effect fit versus the number of tags/barcodes per variant, the middle panel shows the p-value ( $\log_{10}$  transformed) from the fit variant effects versus the number tag/barcodes per variant and the right panel shows a volcano plot (inferred variant effect vs. the  $\log_{10}$  transformed p-value).

## Supplementary Figure 5

**A**

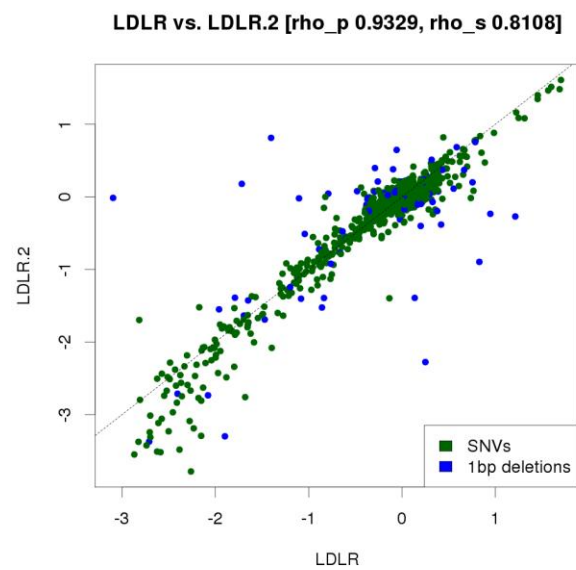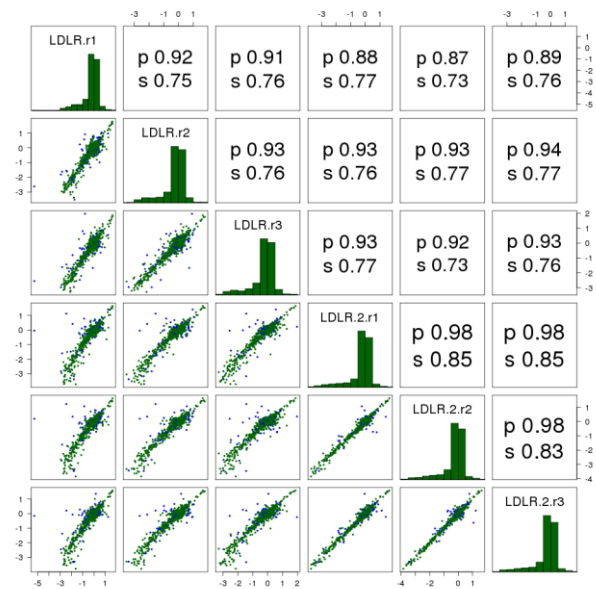

**B**

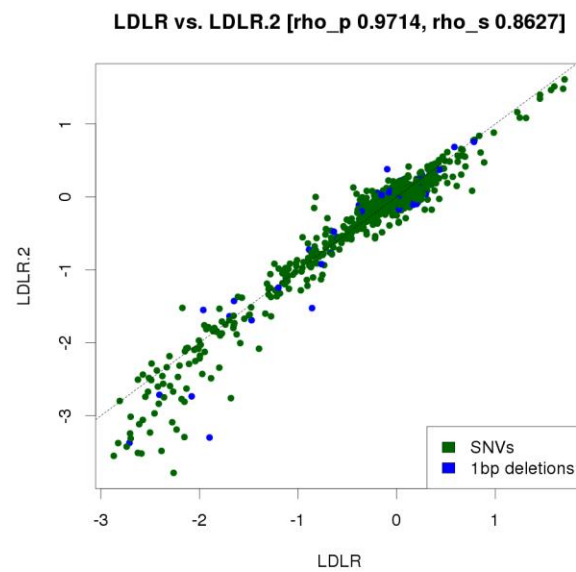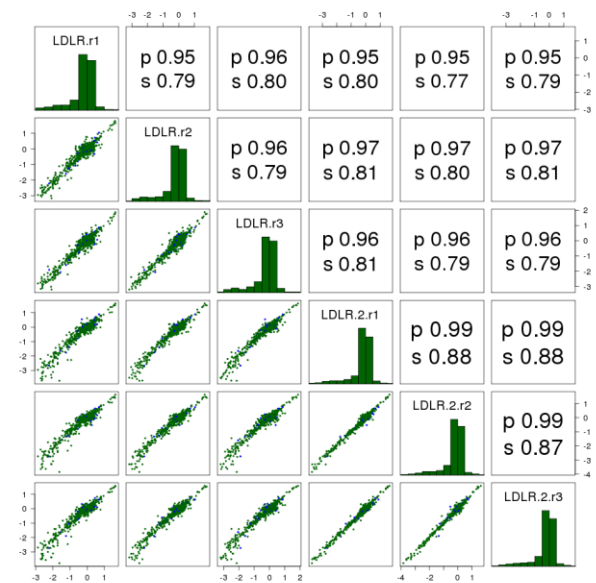

**Biological replicate correlation for LDLR.** Transfection and biological replicate correlation in LDLR experiments, before **(A)** and after **(B)** filtering for a minimum of 10 tags per variant.

## Supplementary Figure 6

**A**

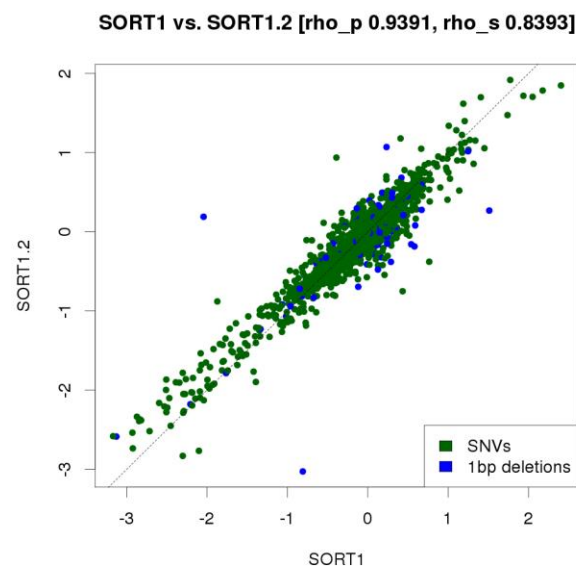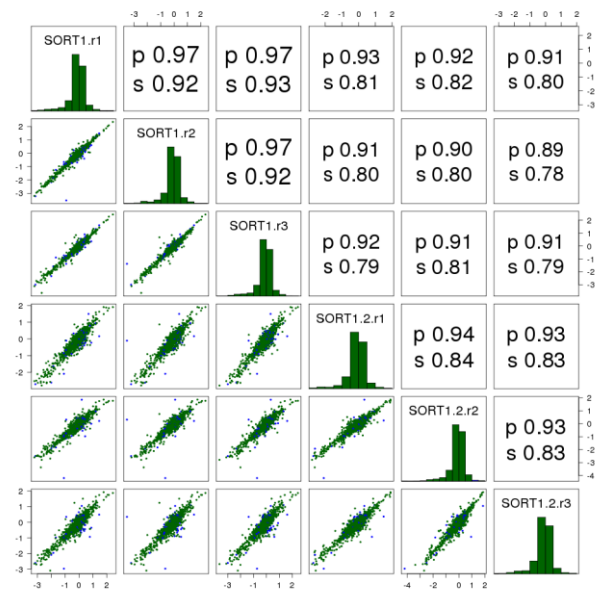

**B**

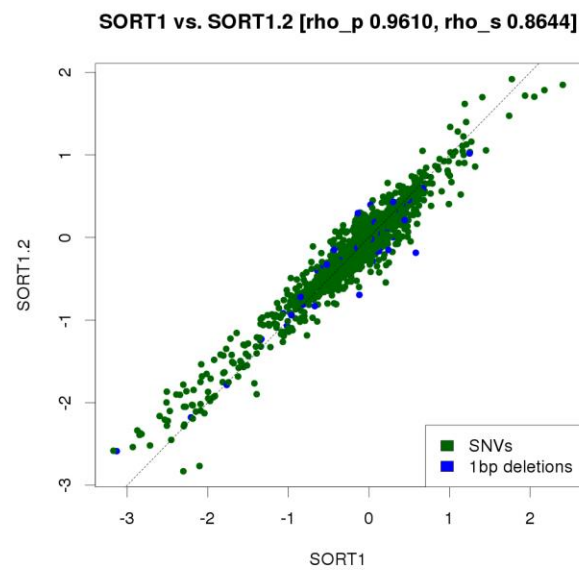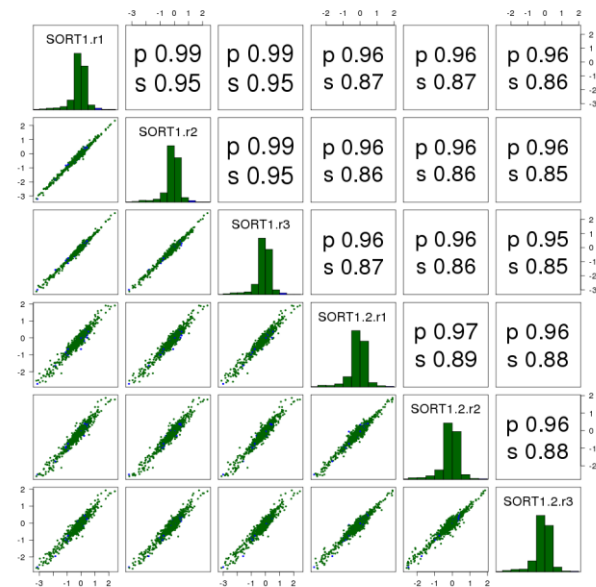

**Biological replicate correlation for SORT1.** Transfection and biological replicate correlation in SORT experiments, before **(A)** and after **(B)** filtering for a minimum of 10 tags per variant.



**Supplementary Figure 7**

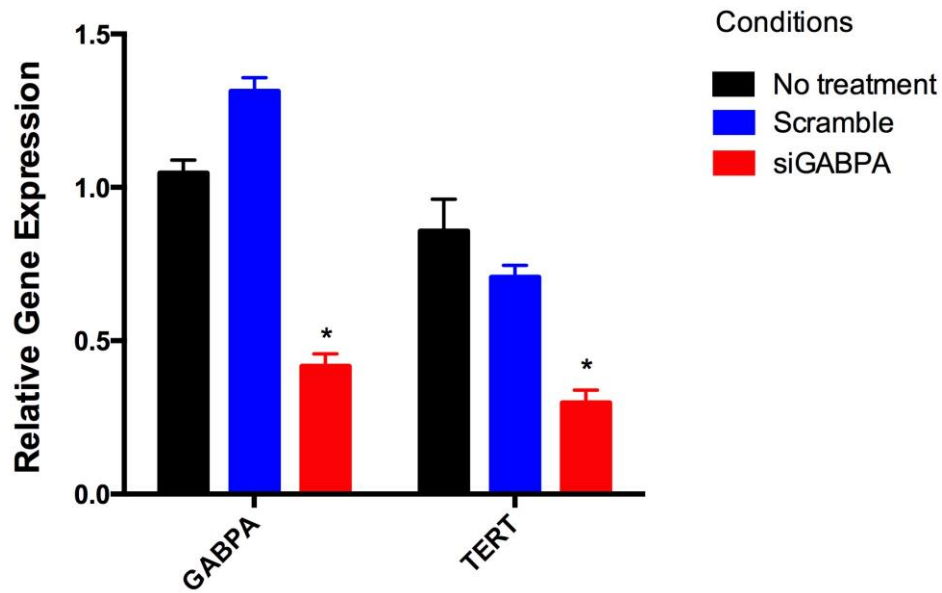

**Quantitative RT-PCR validation results of TERT-GBM short-interfering RNA experiments.** To measure siRNA knockdown efficiency, qPCR was performed using the Ambion Power SYBR Green Cells-to-Ct kit to measure mRNA abundance of *GABPA* and *TERT* with primer sequences previously used (see Methods). Relative expression levels were calculated using the deltaCT method against the housekeeping gene *GUSB*.

Supplementary Figure 8

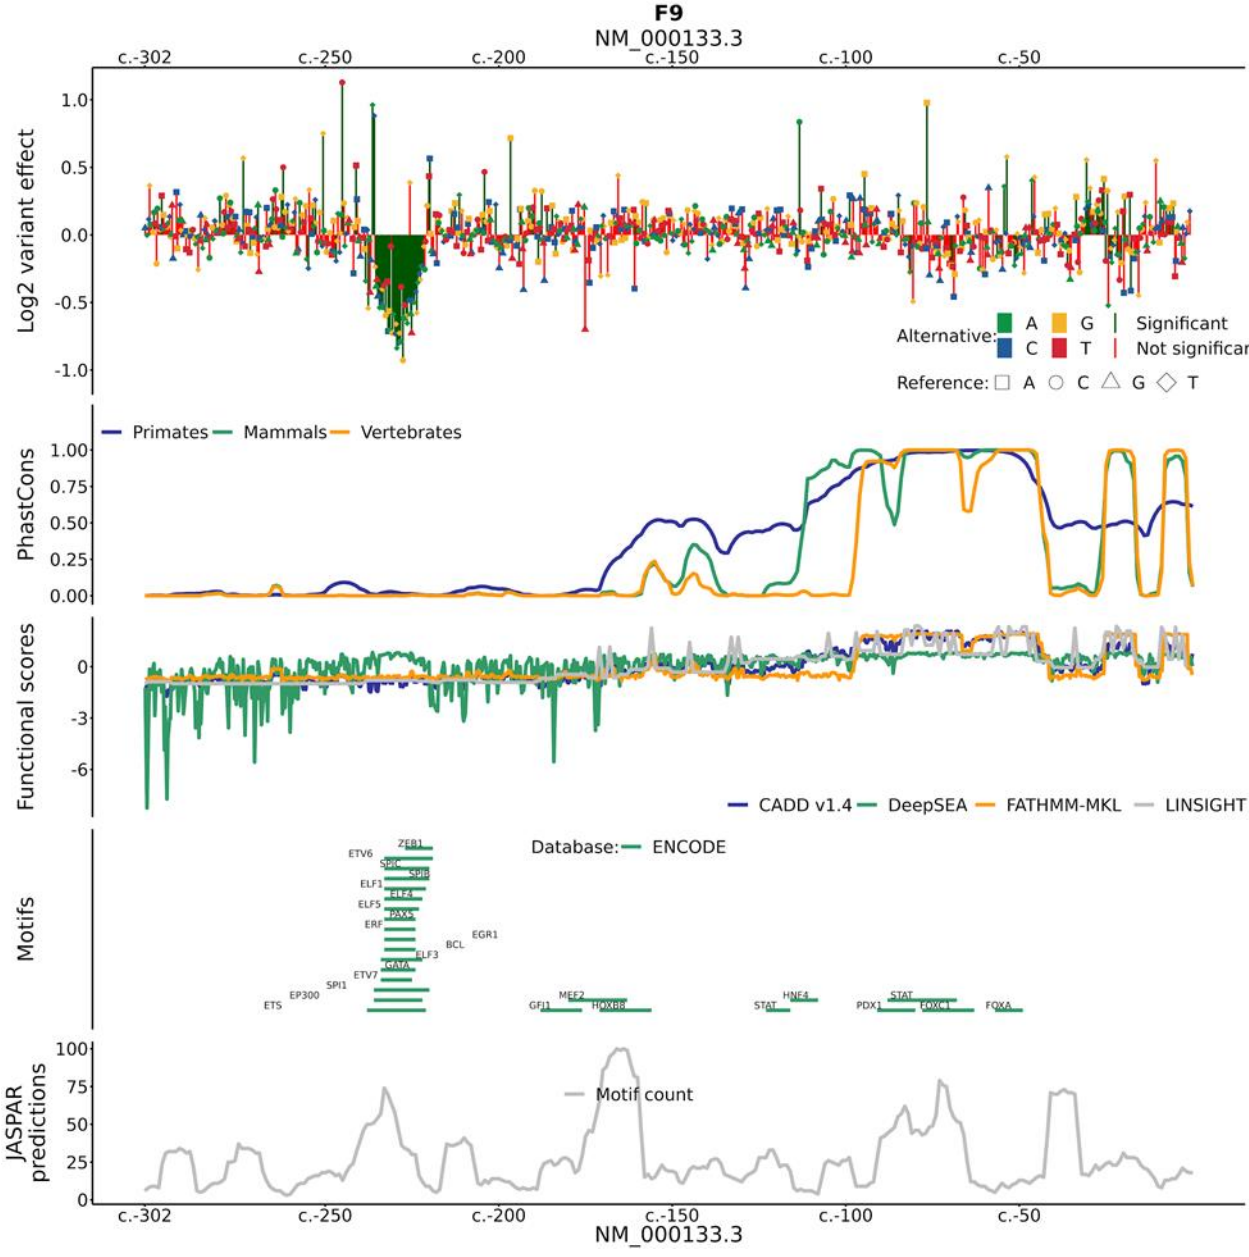

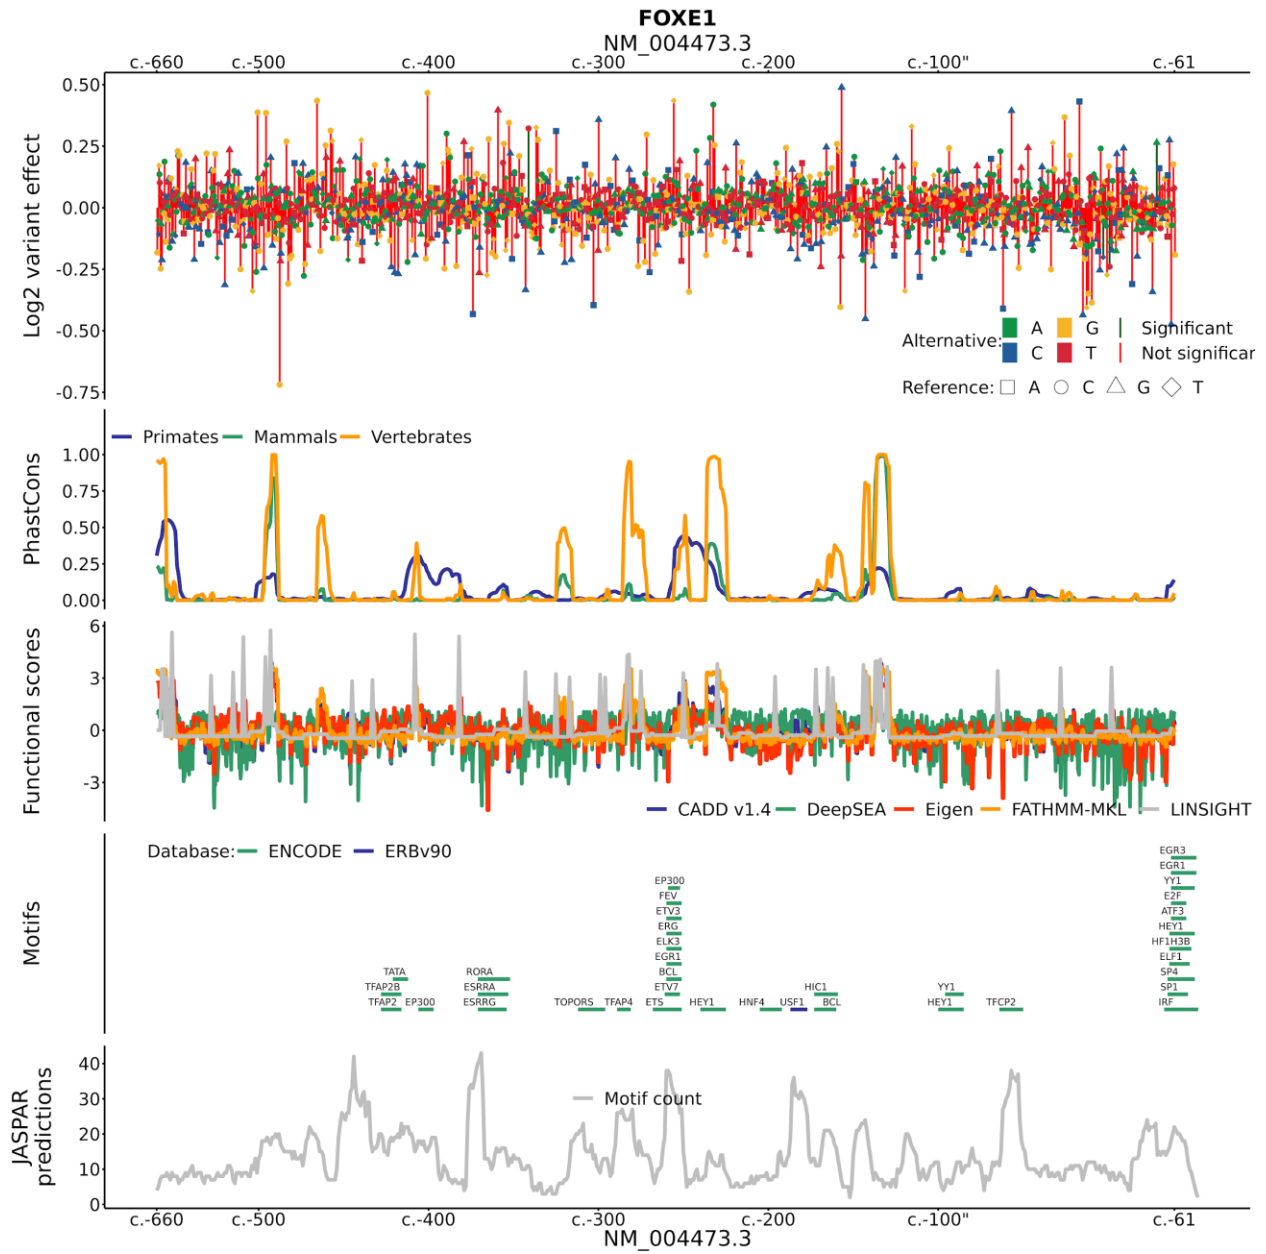

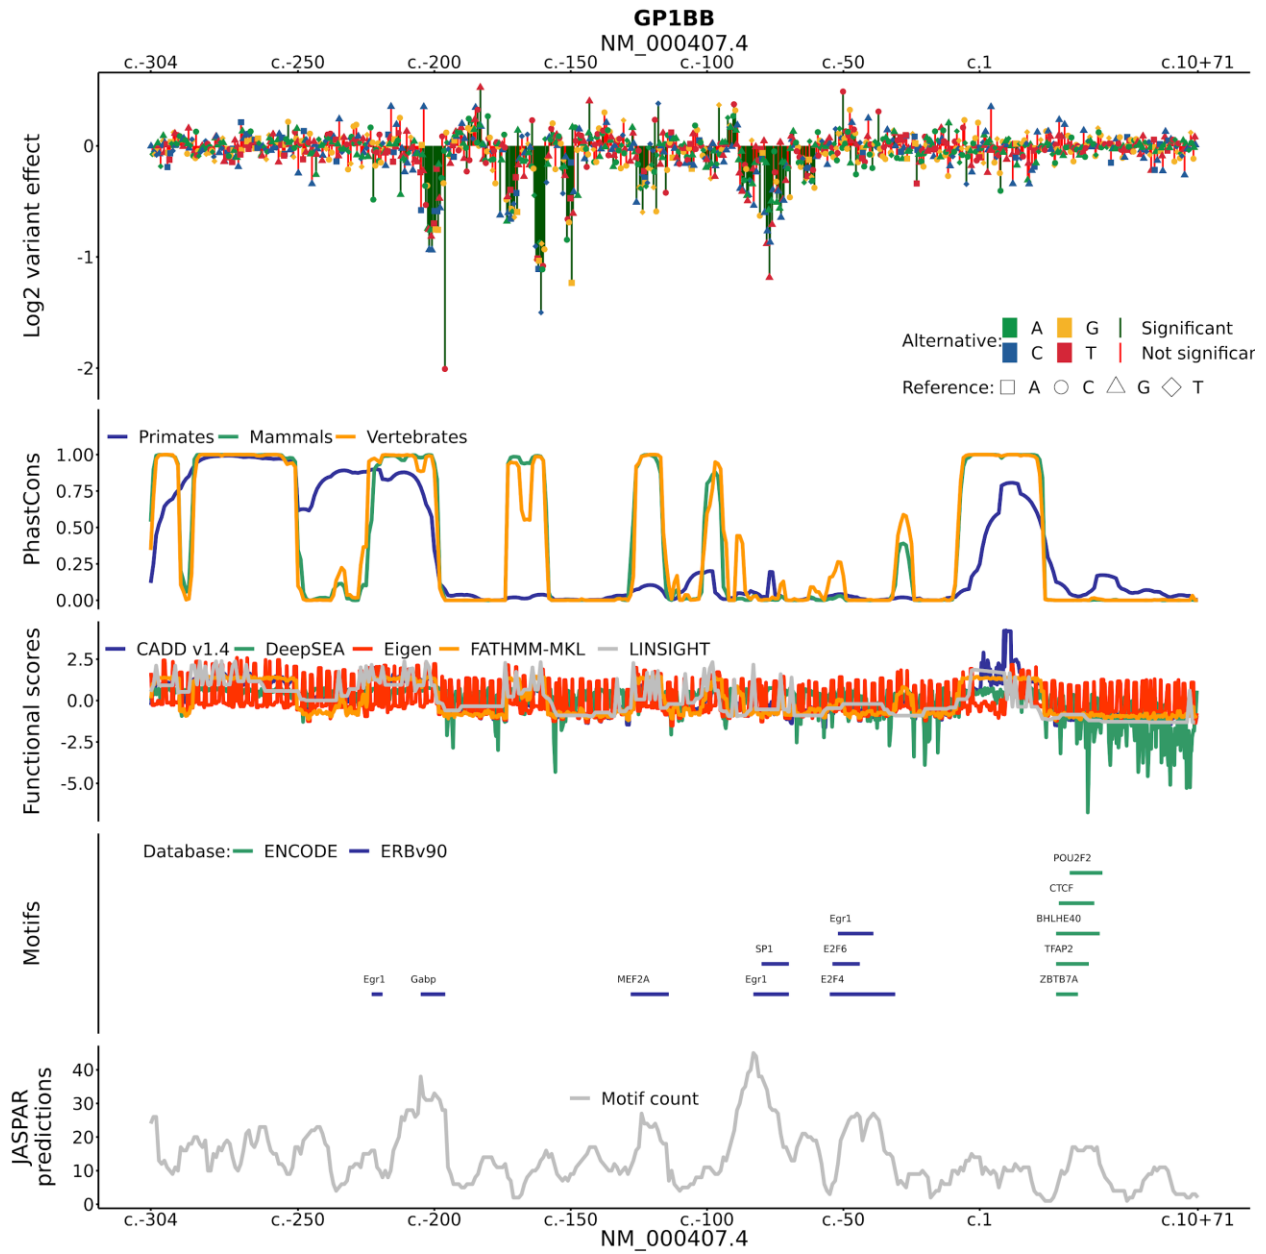

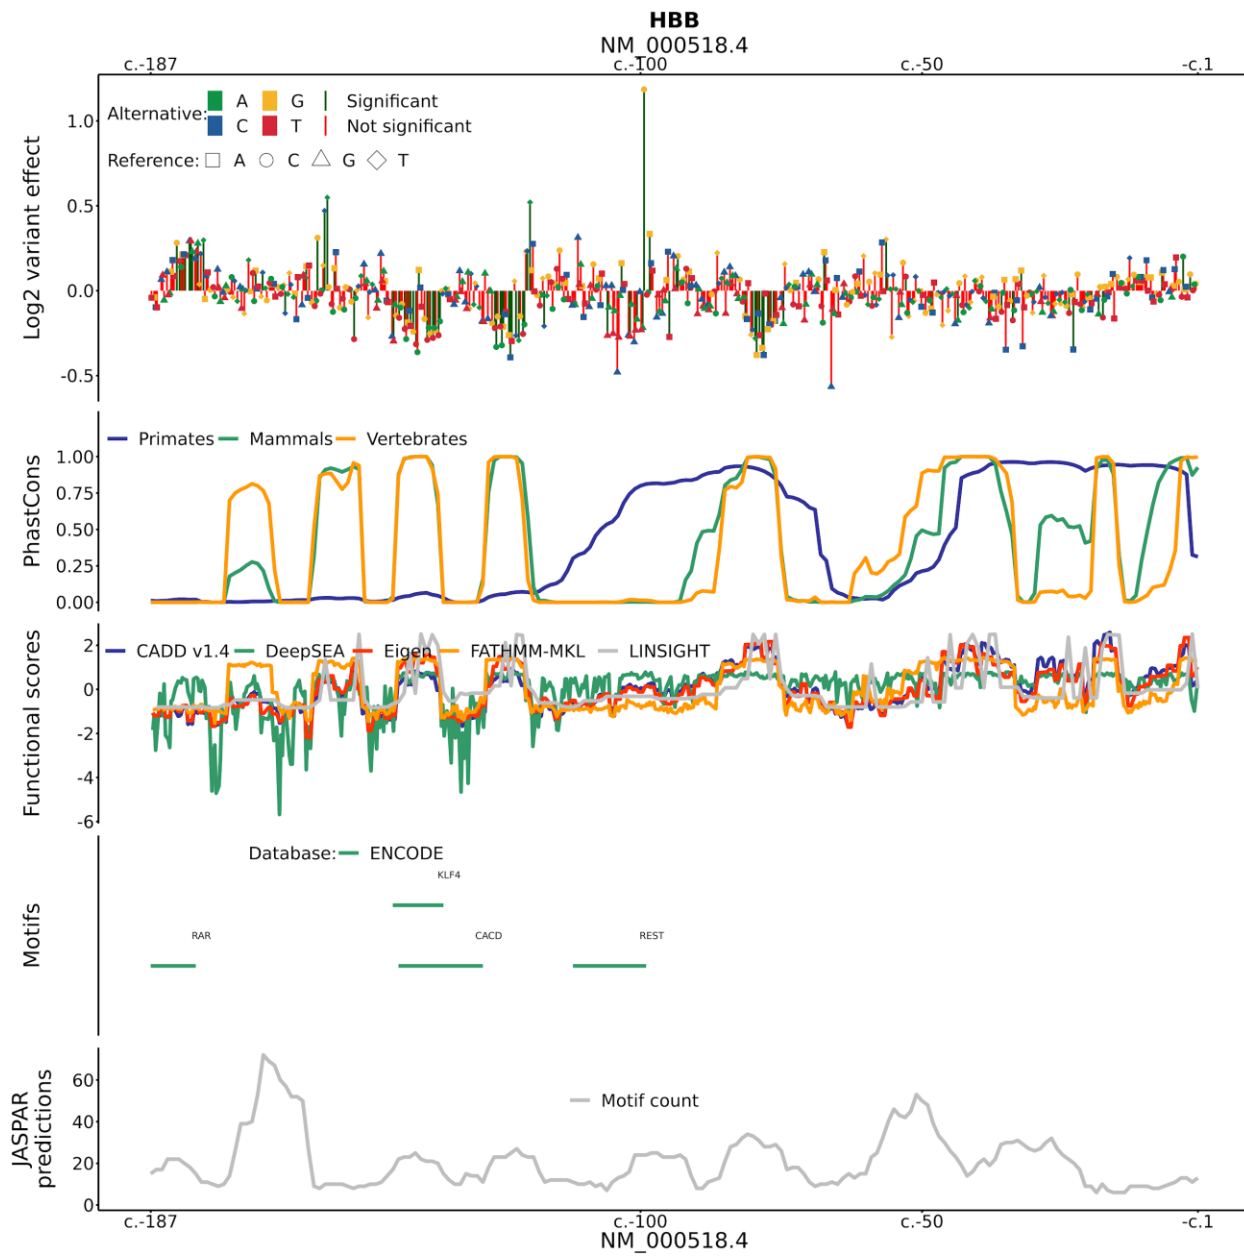

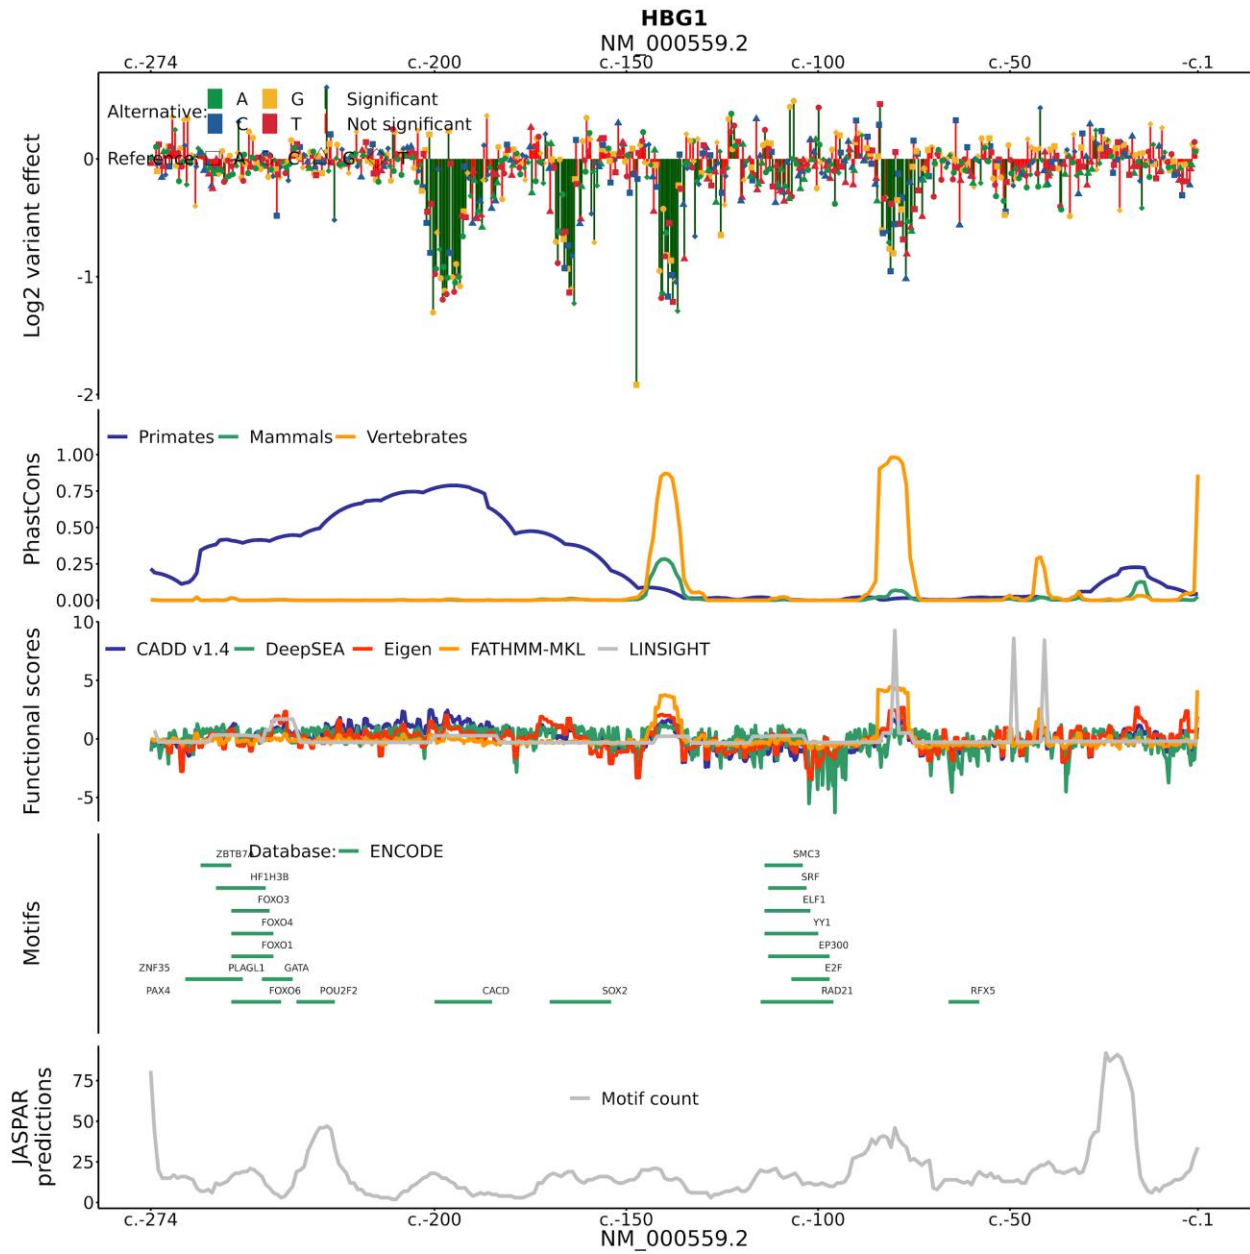

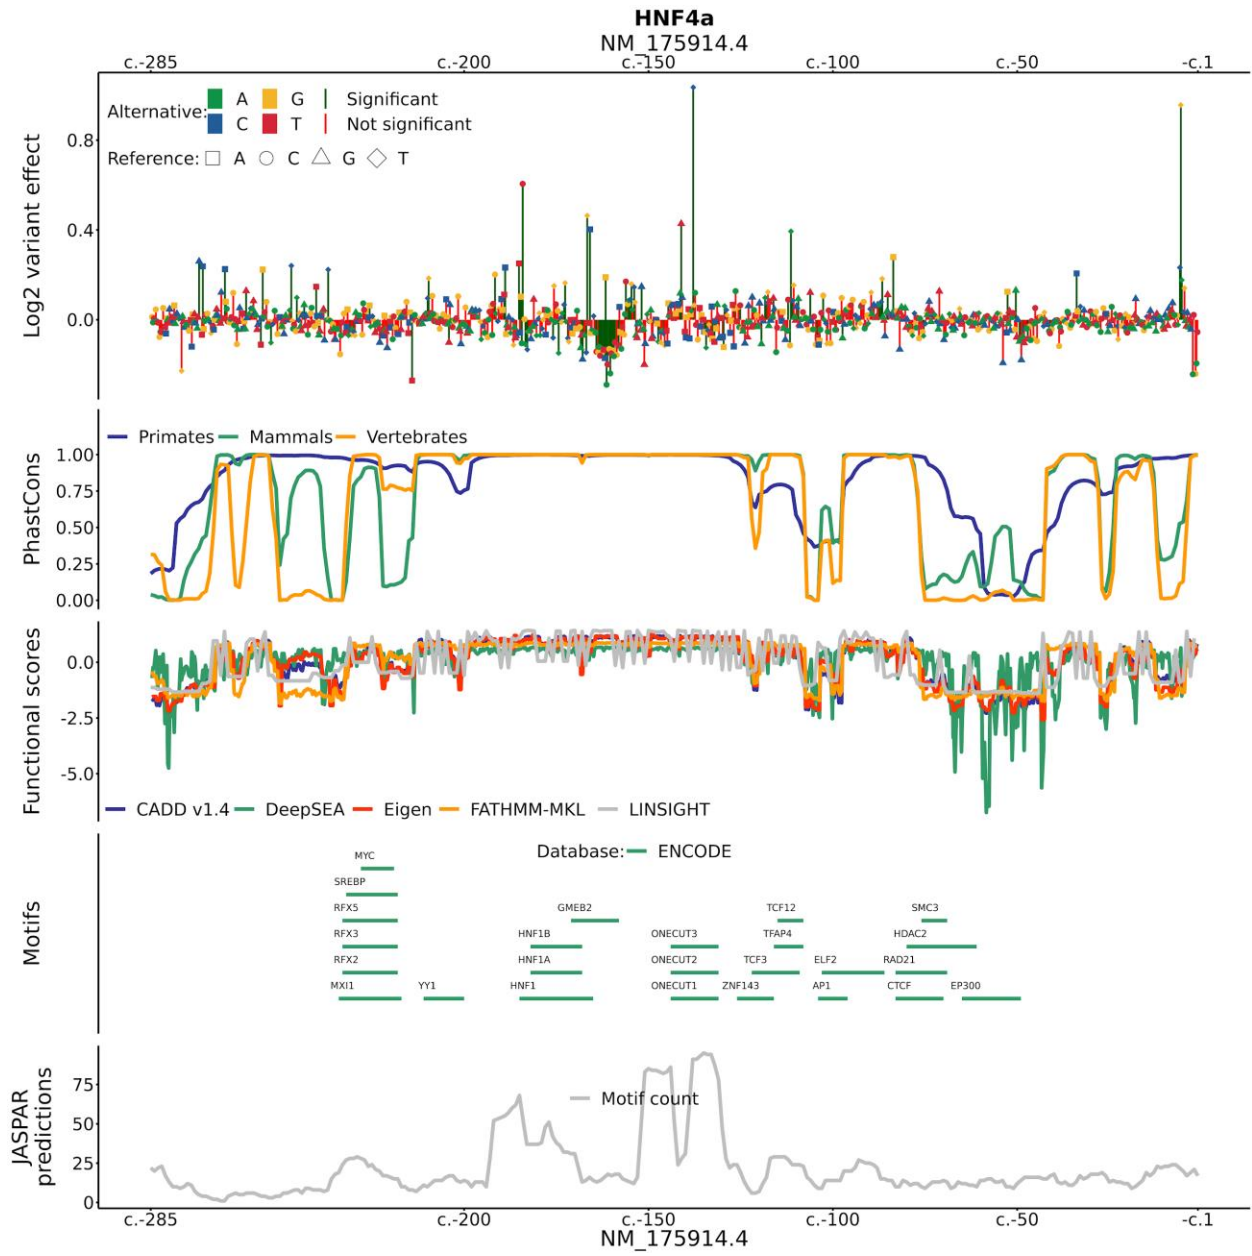

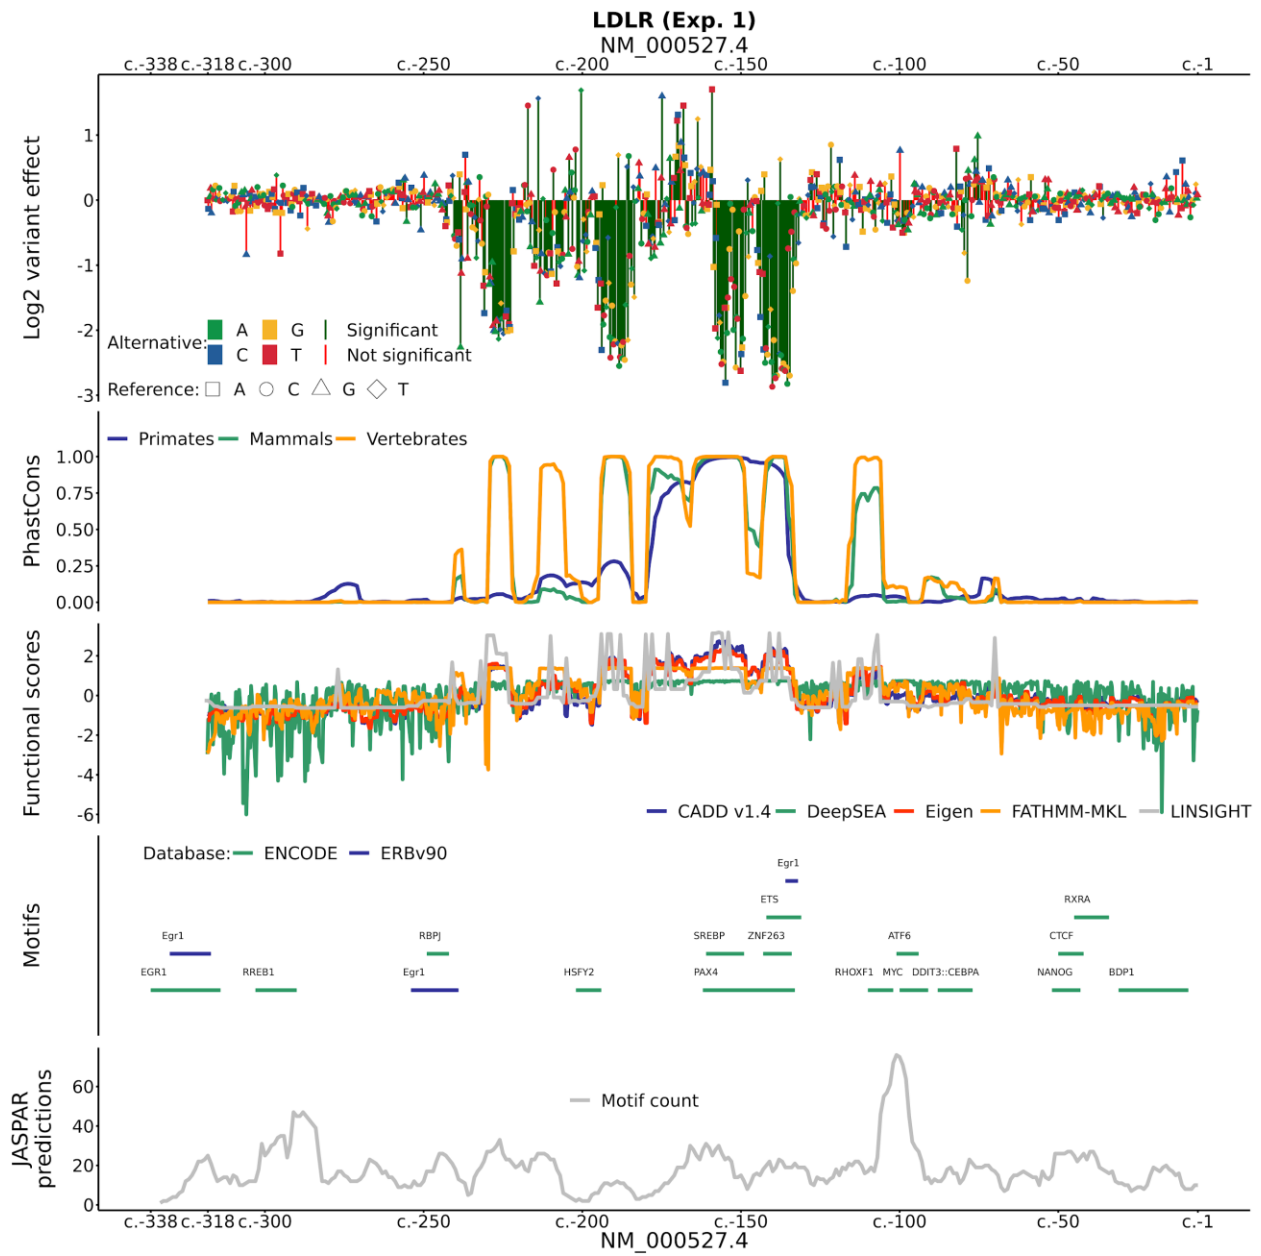



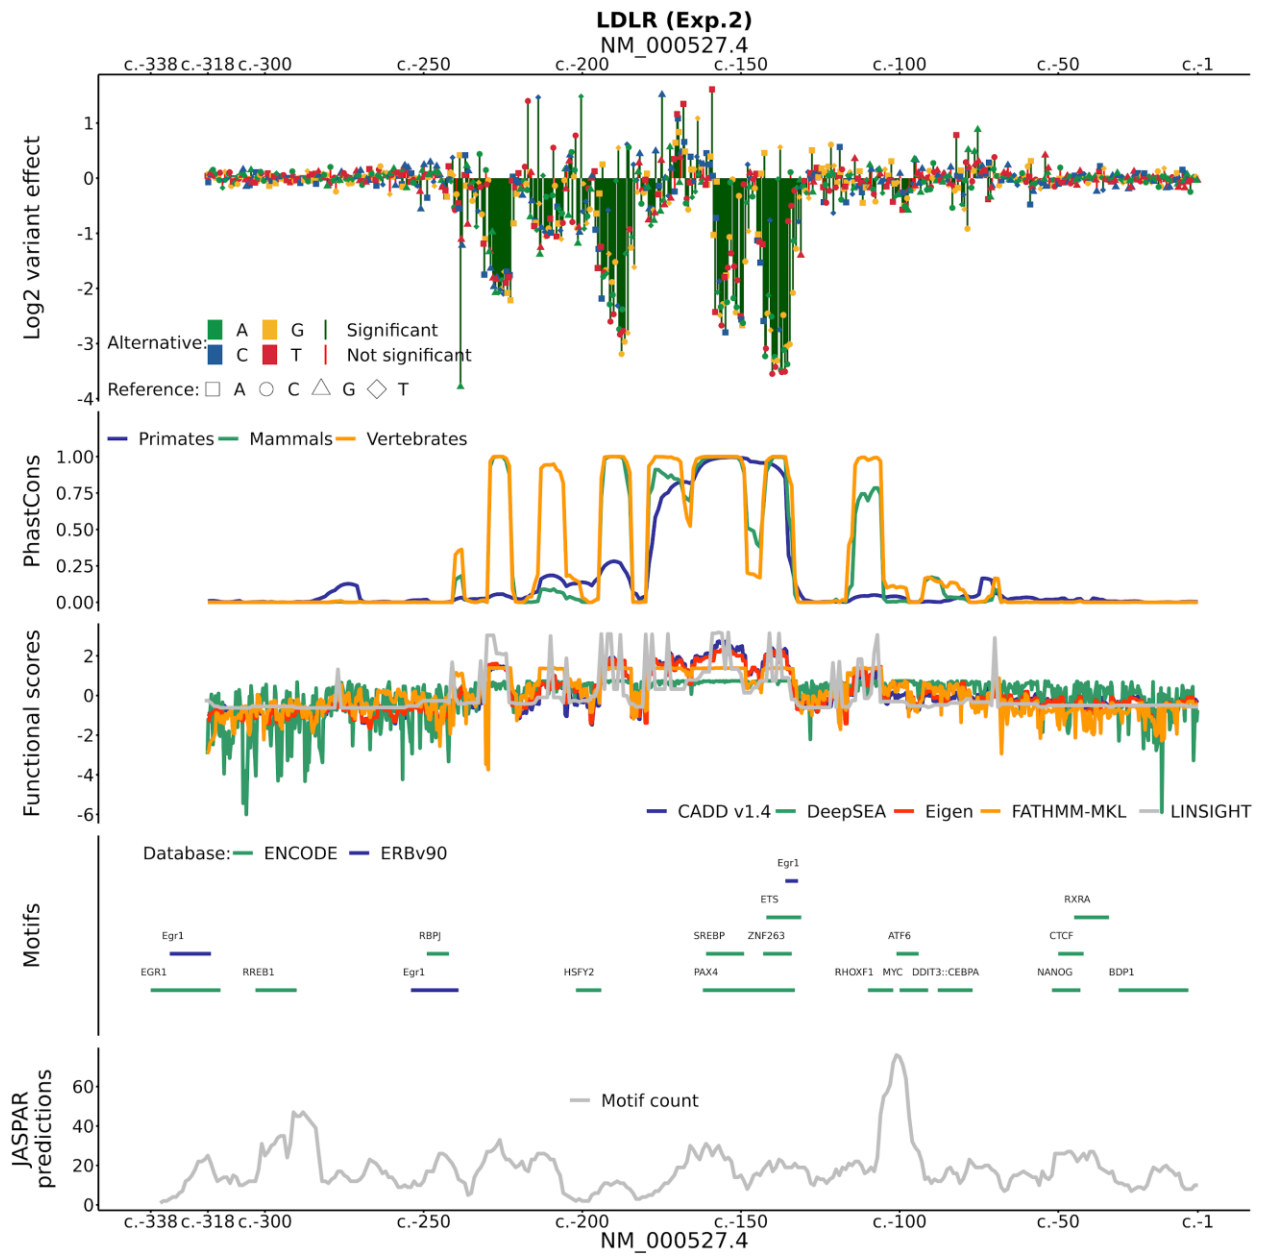

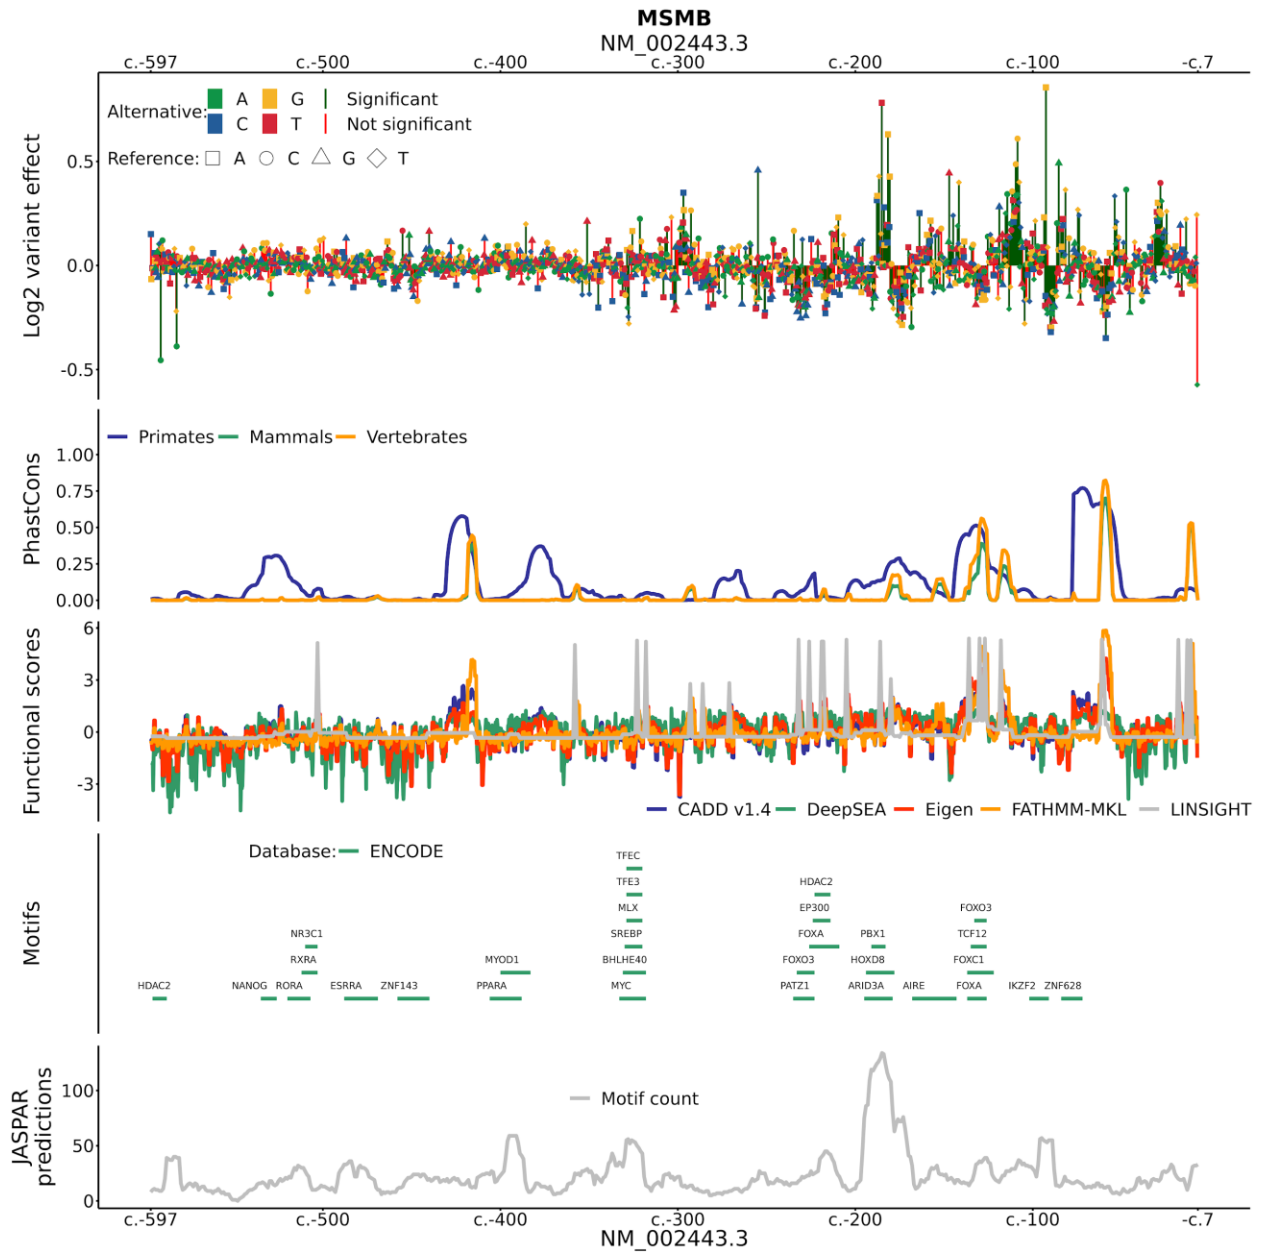

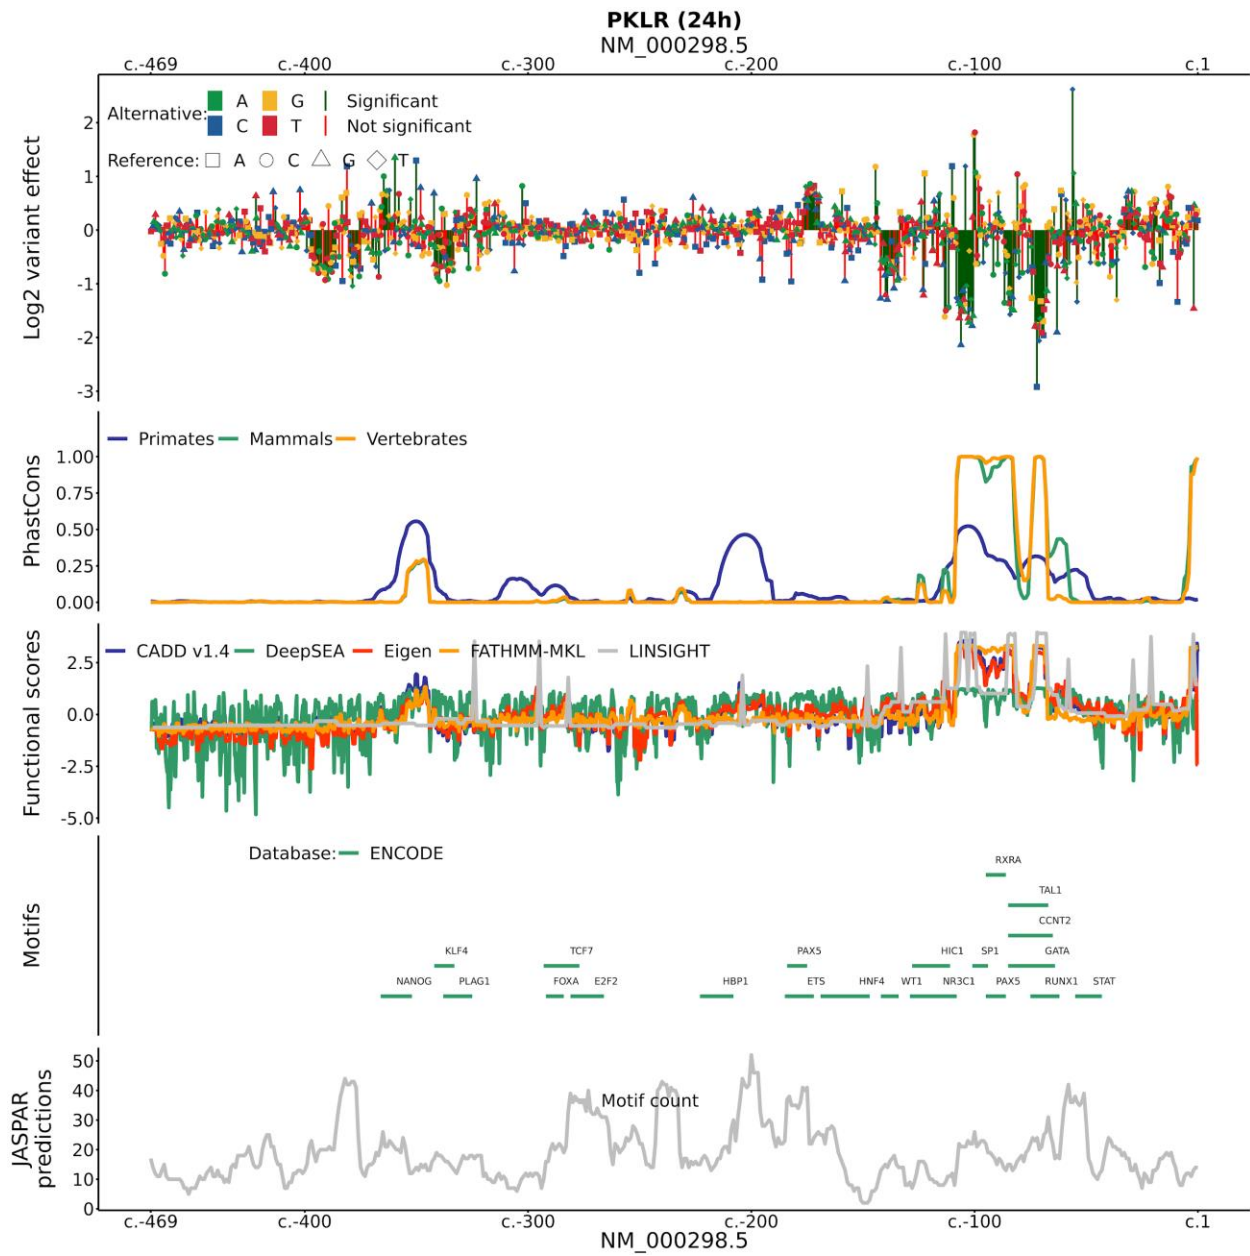

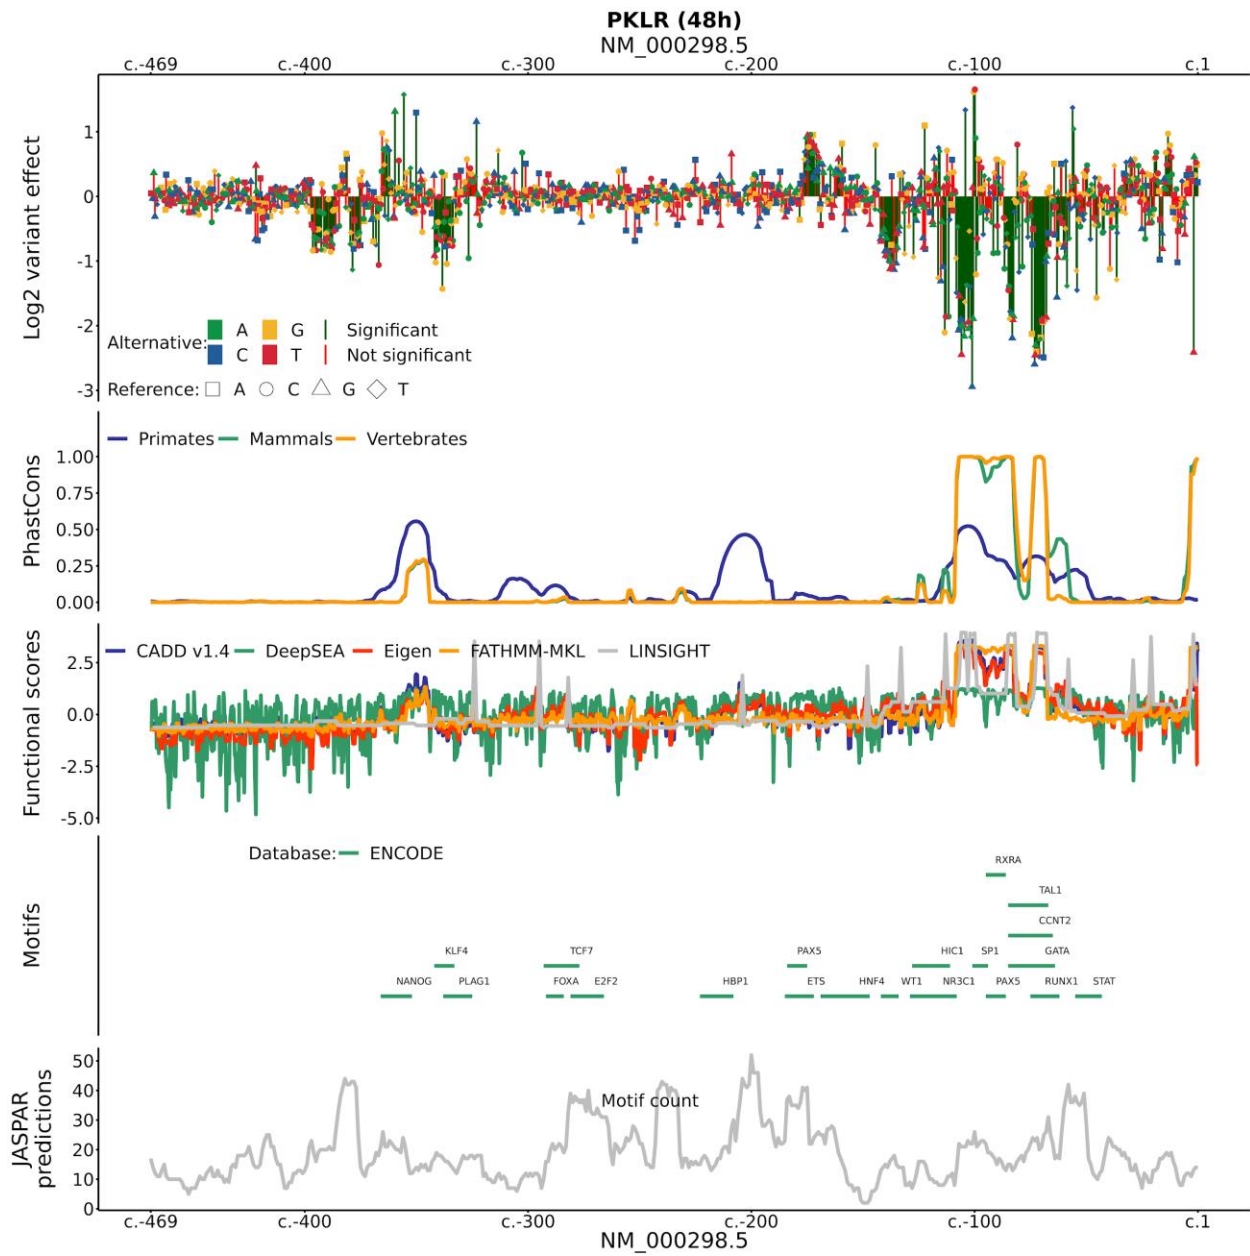

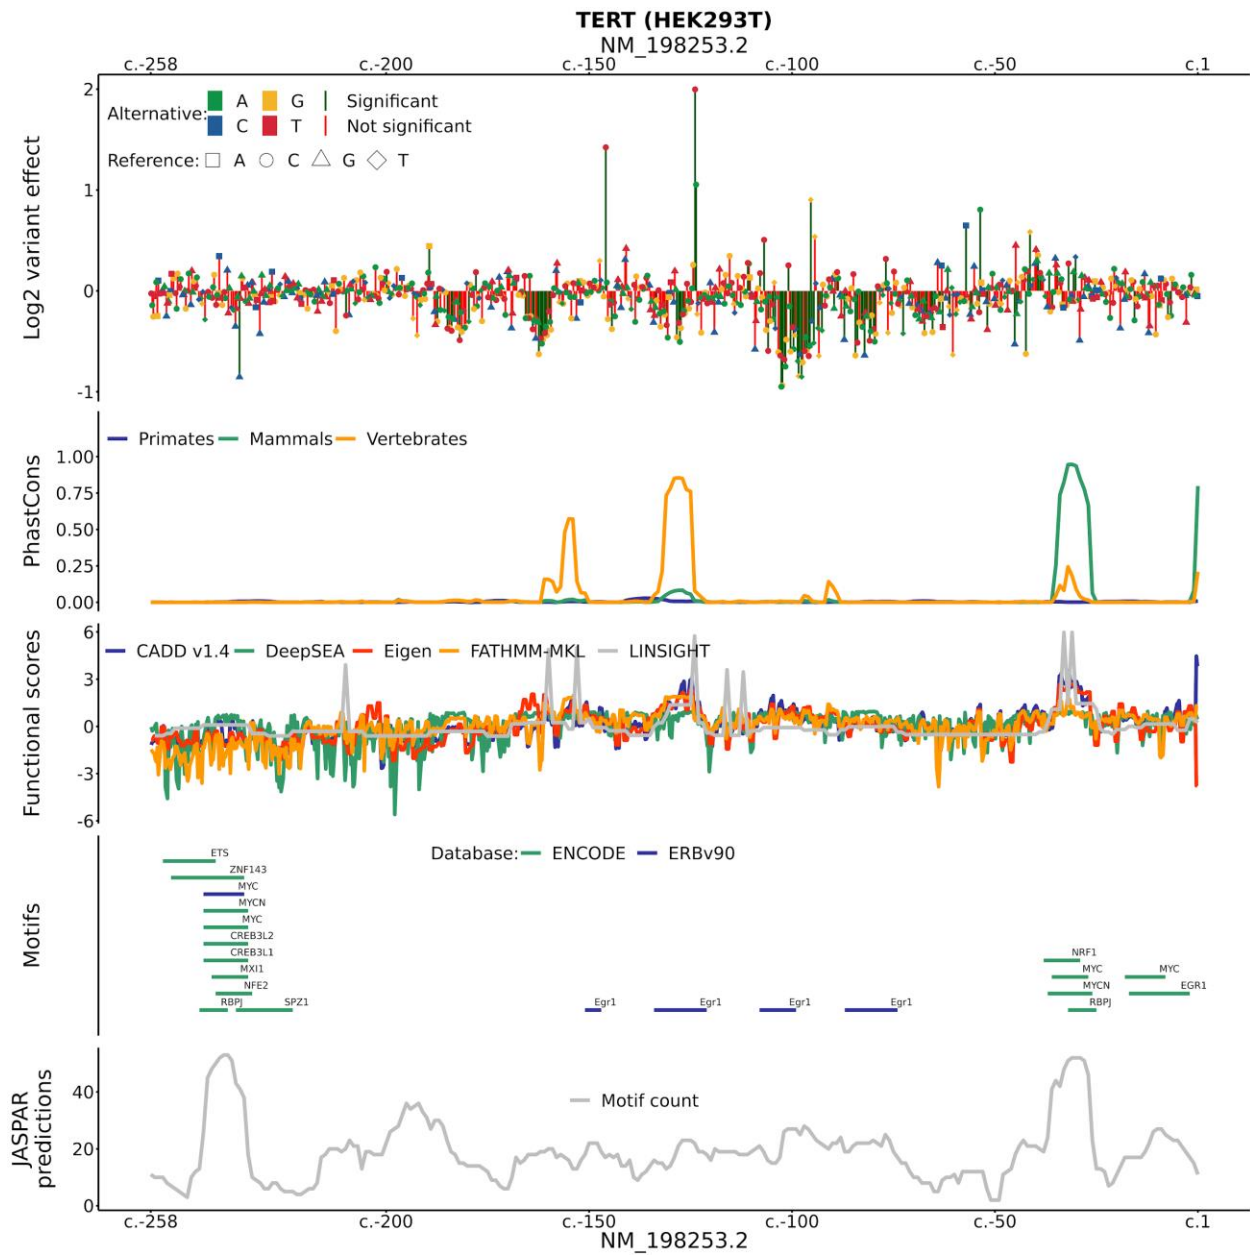

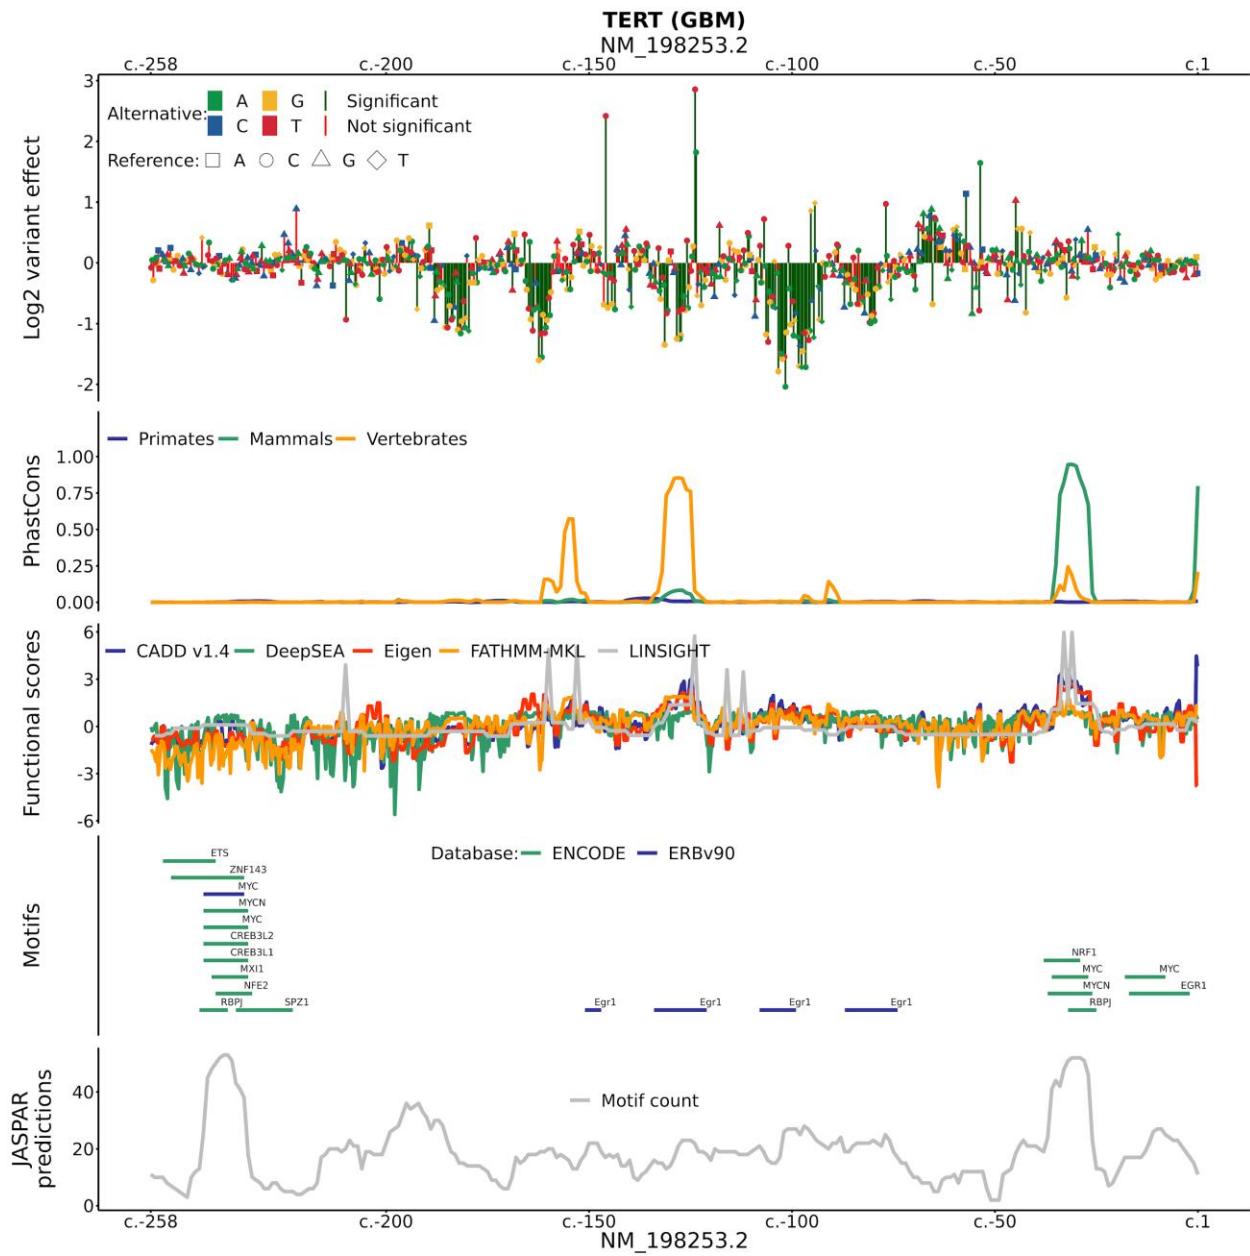

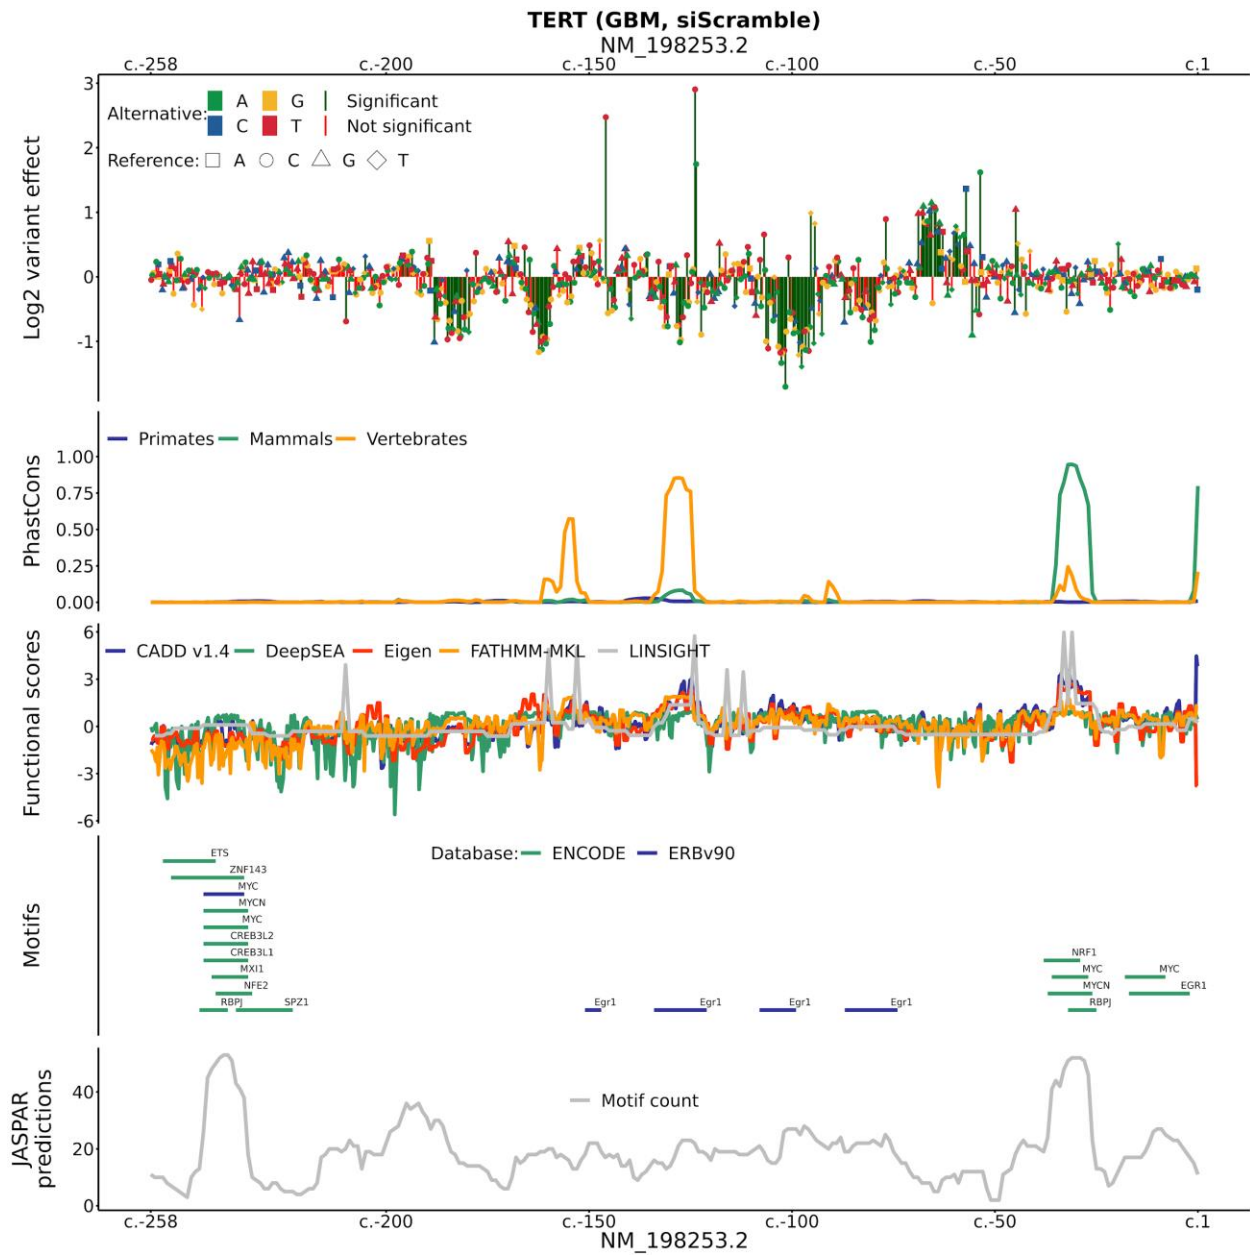

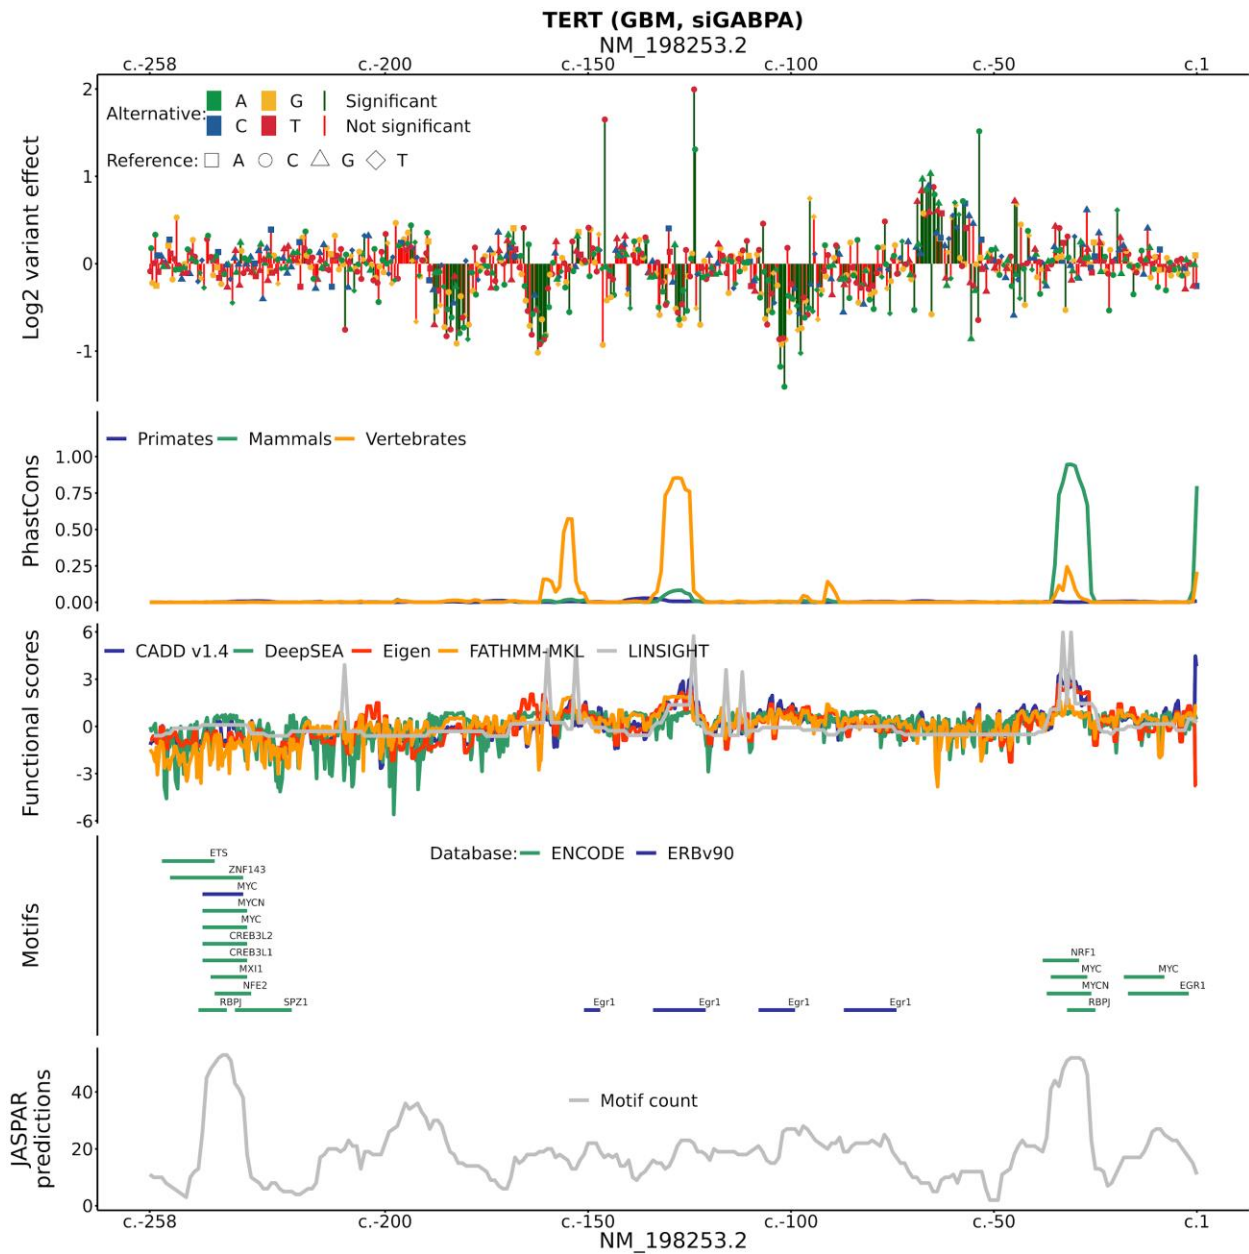

**Overlay of inferred variant effects for SNVs from promoter elements with available annotation data.** Motif predictions overlaid with biochemical evidence from ChIP-seq experiments were obtained from Ensembl Regulatory Build (ERB)<sup>33</sup> and ENCODE<sup>3</sup> annotations. JASPAR motif predictions were obtained from the JASPAR 2018<sup>6</sup> release.



**Supplementary Figure 9**

**BCL11A**

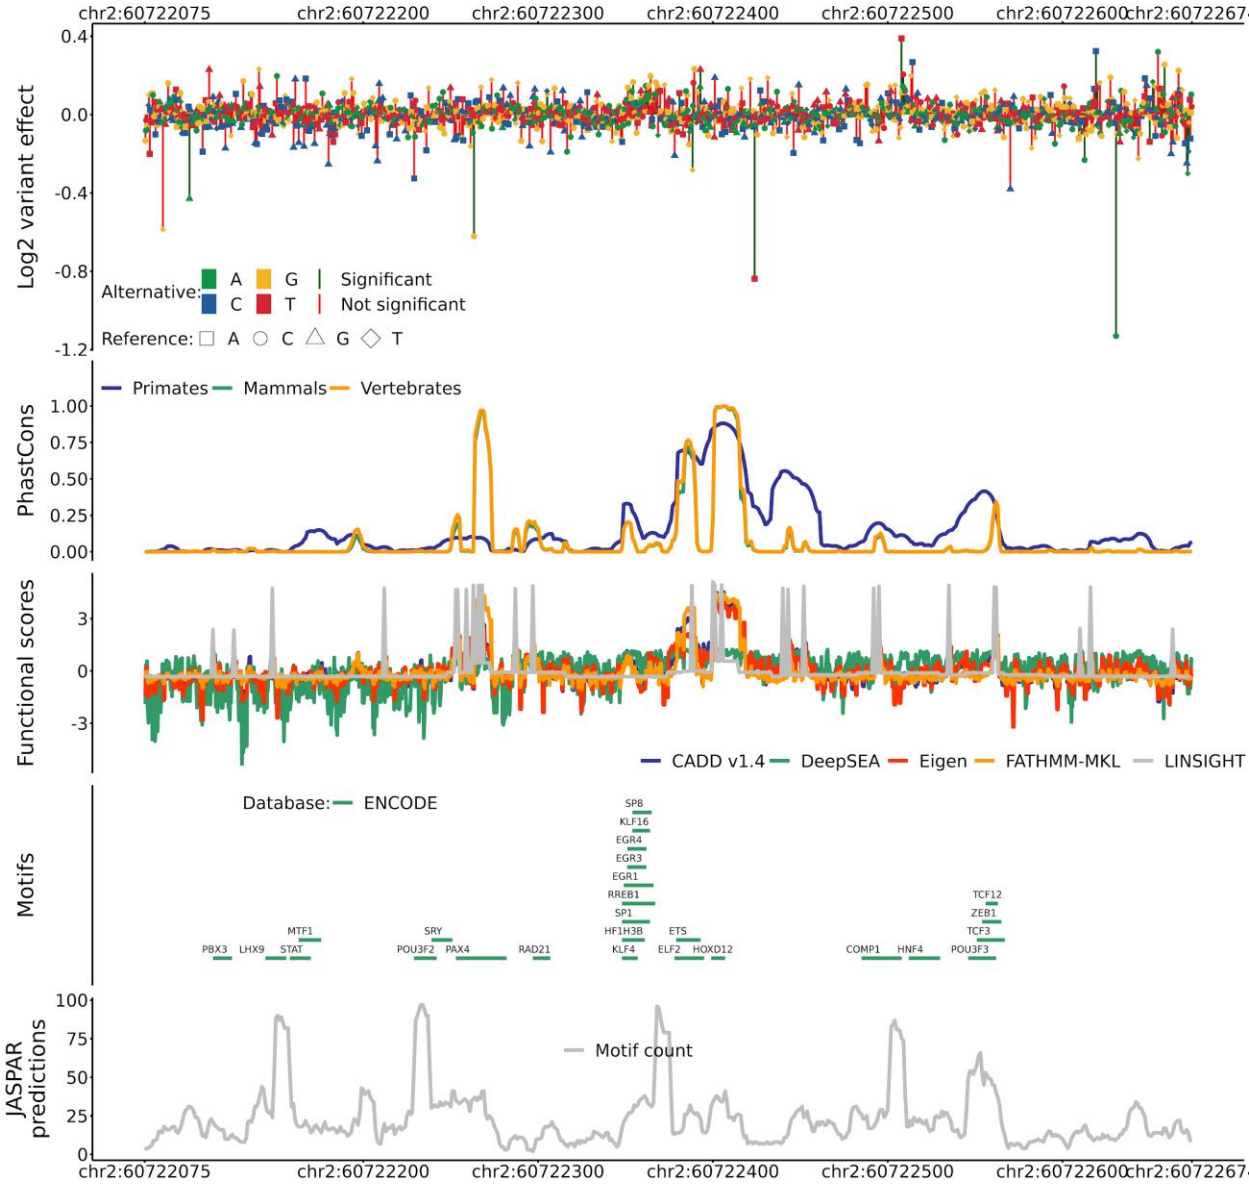

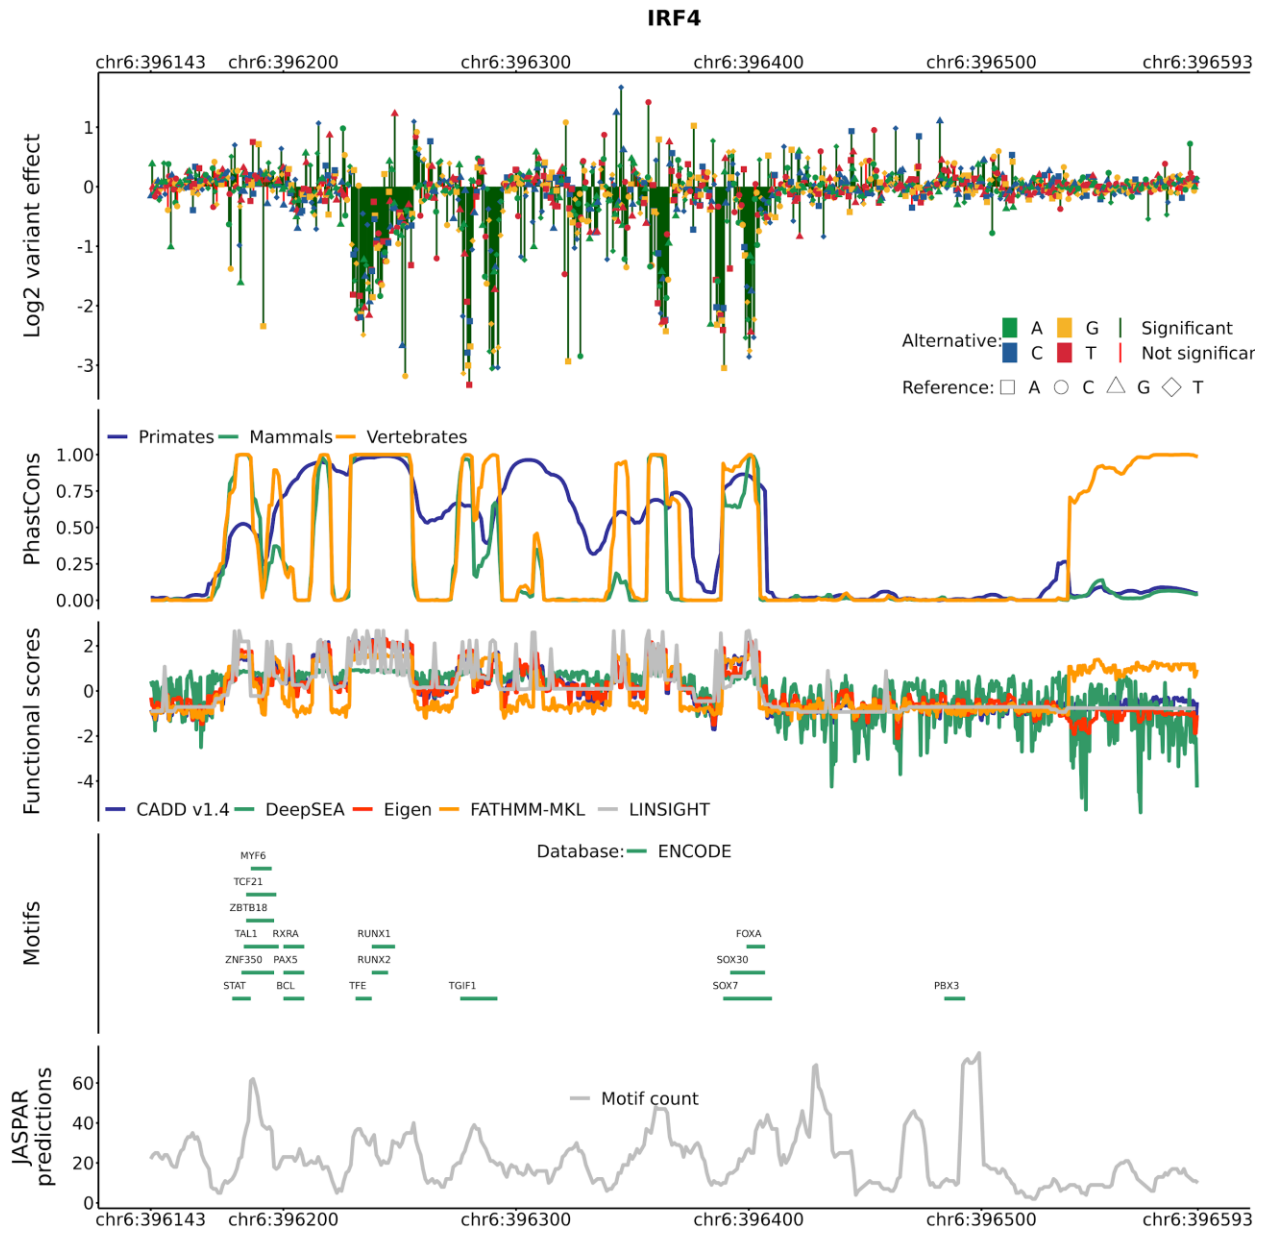

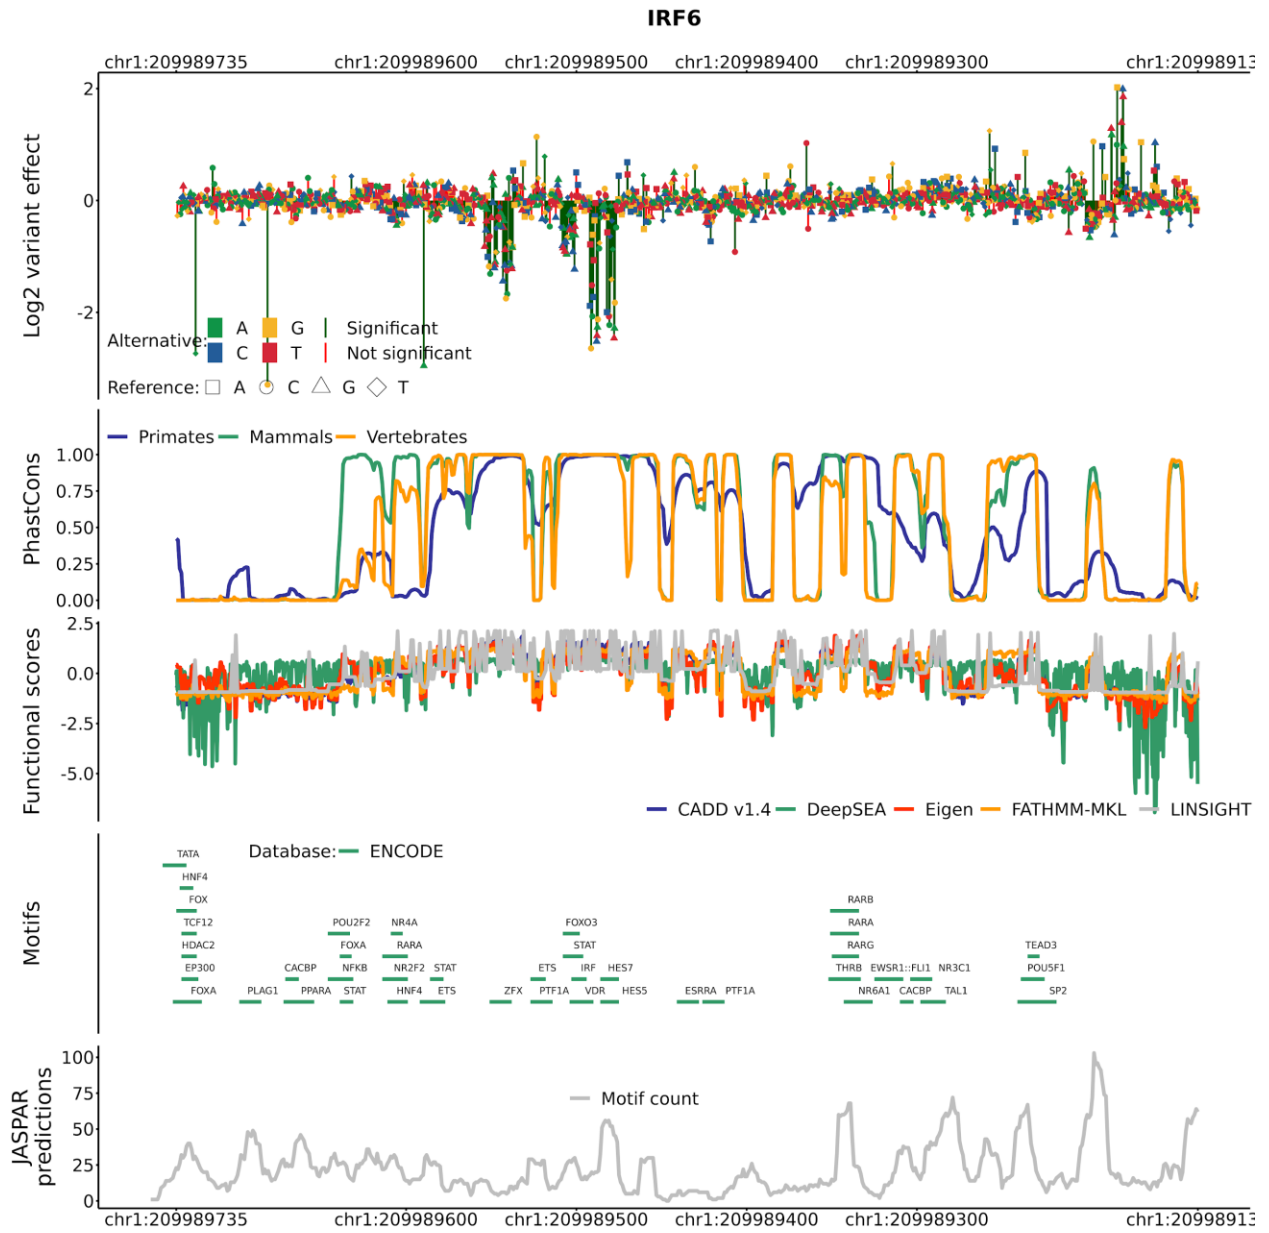

**MYC (rs6983267)**

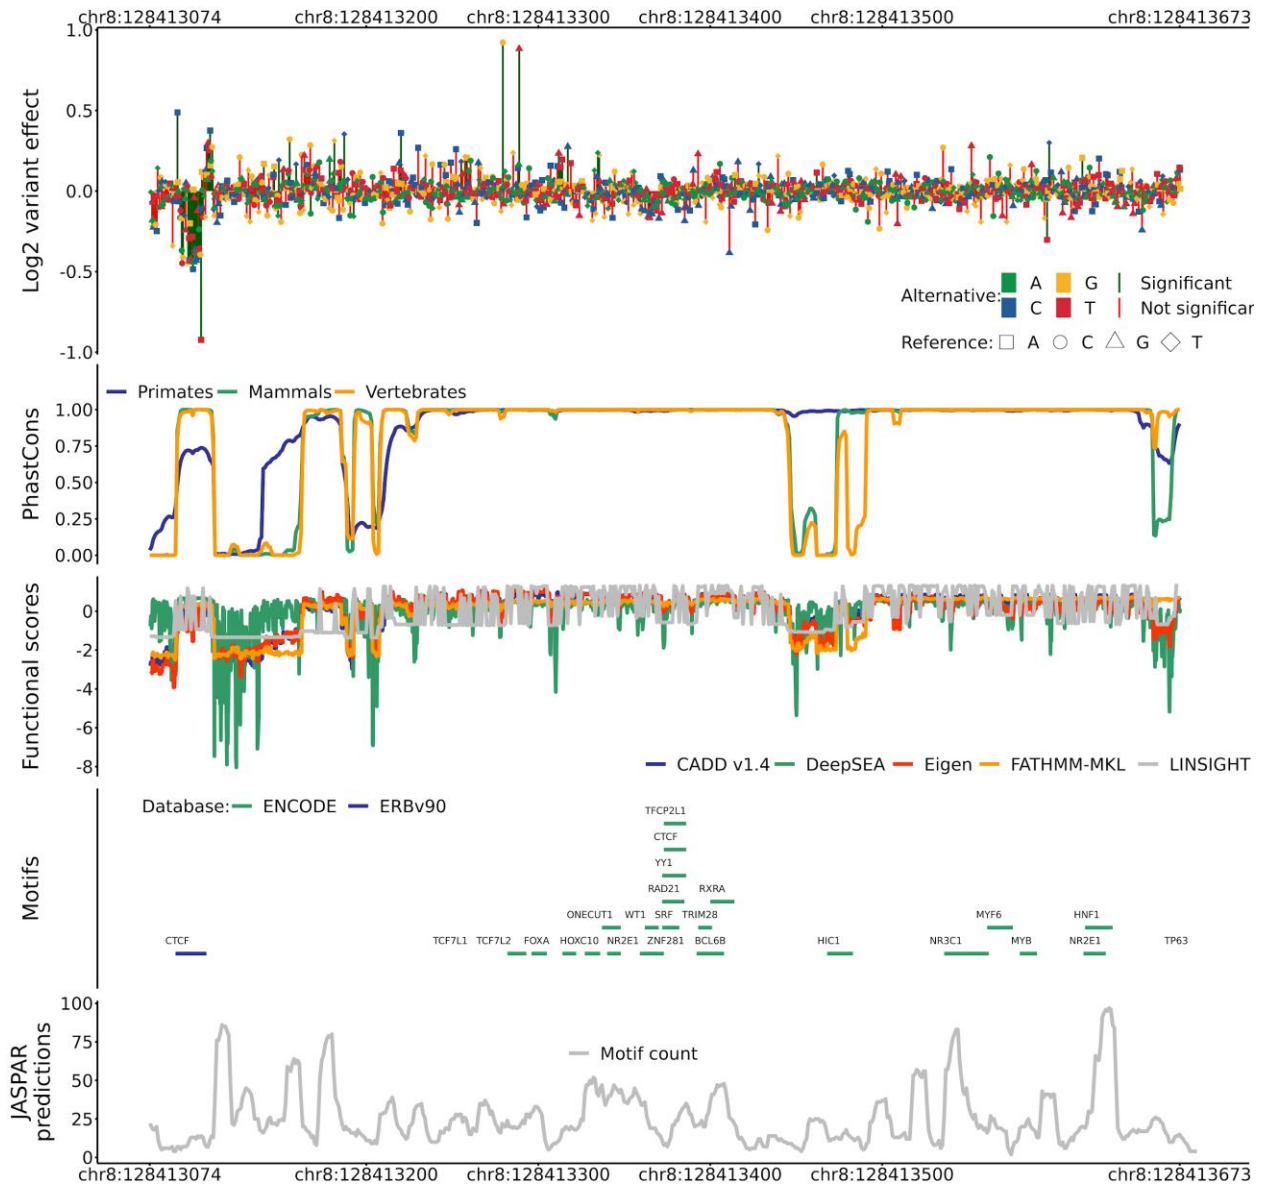

### MYC (rs11986220)

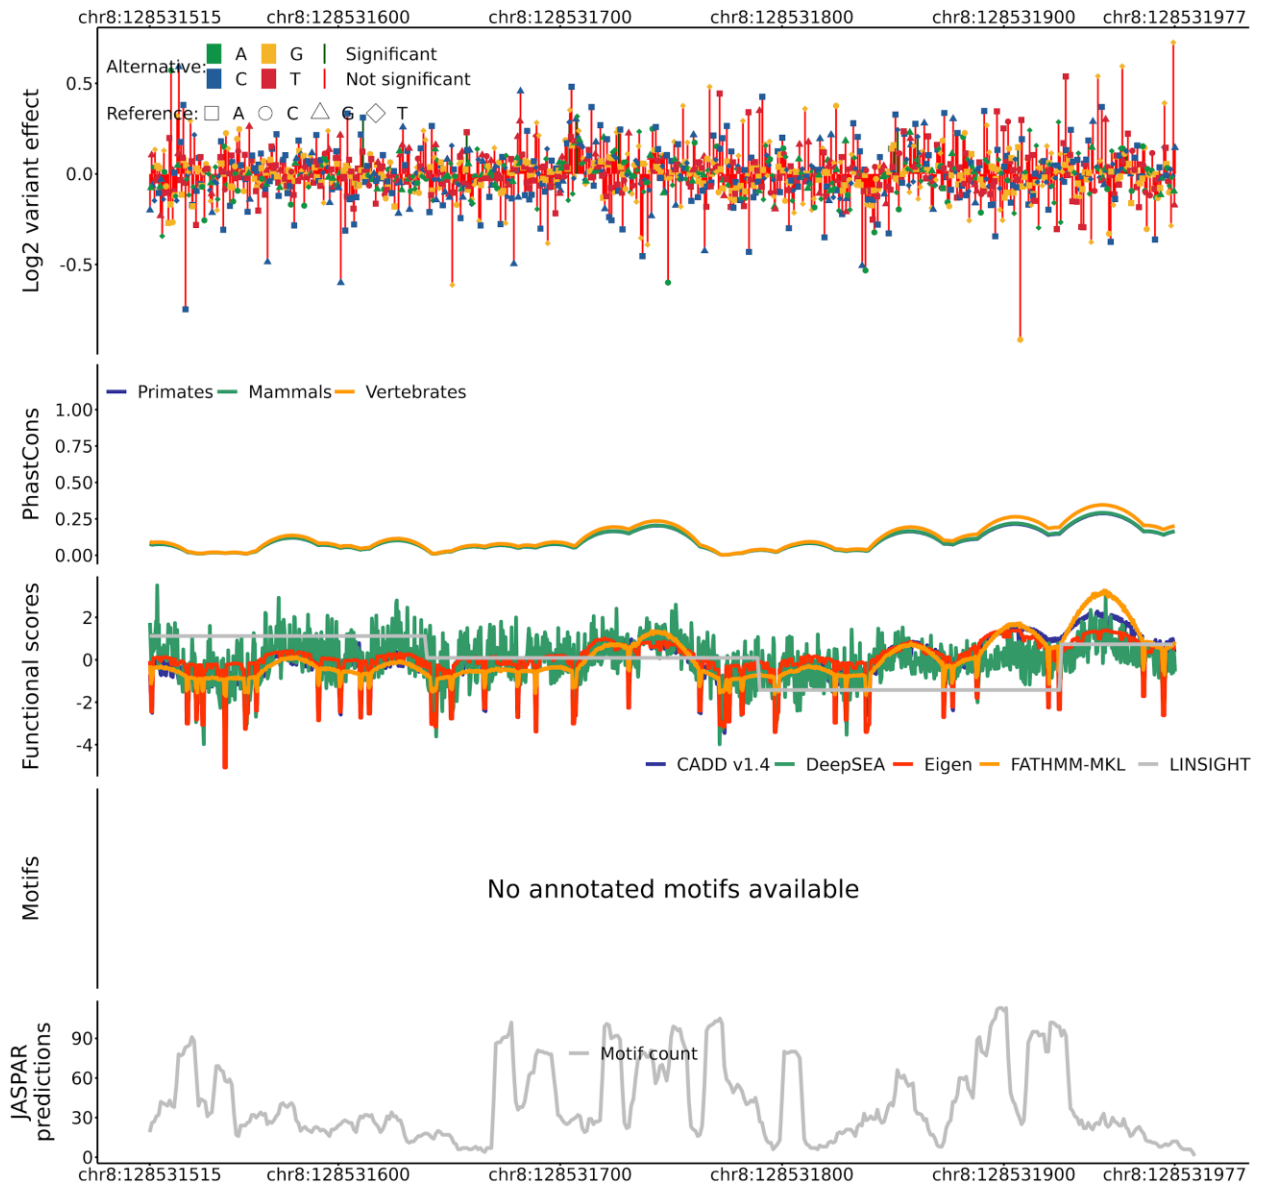

# RET

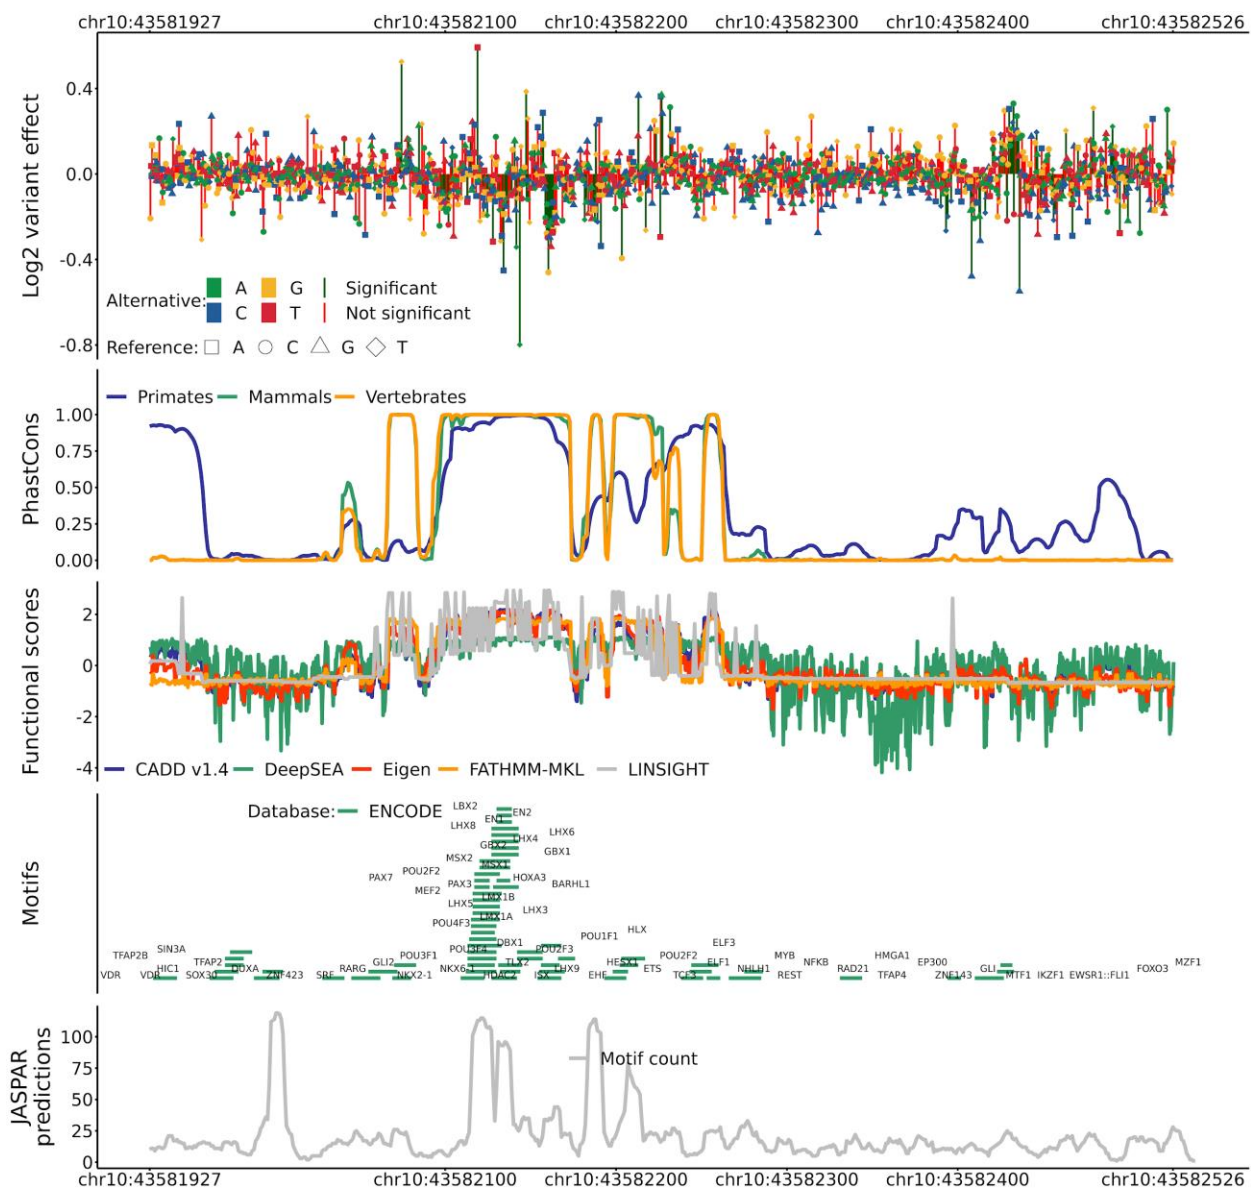

### SORT1 (Exp. 1)

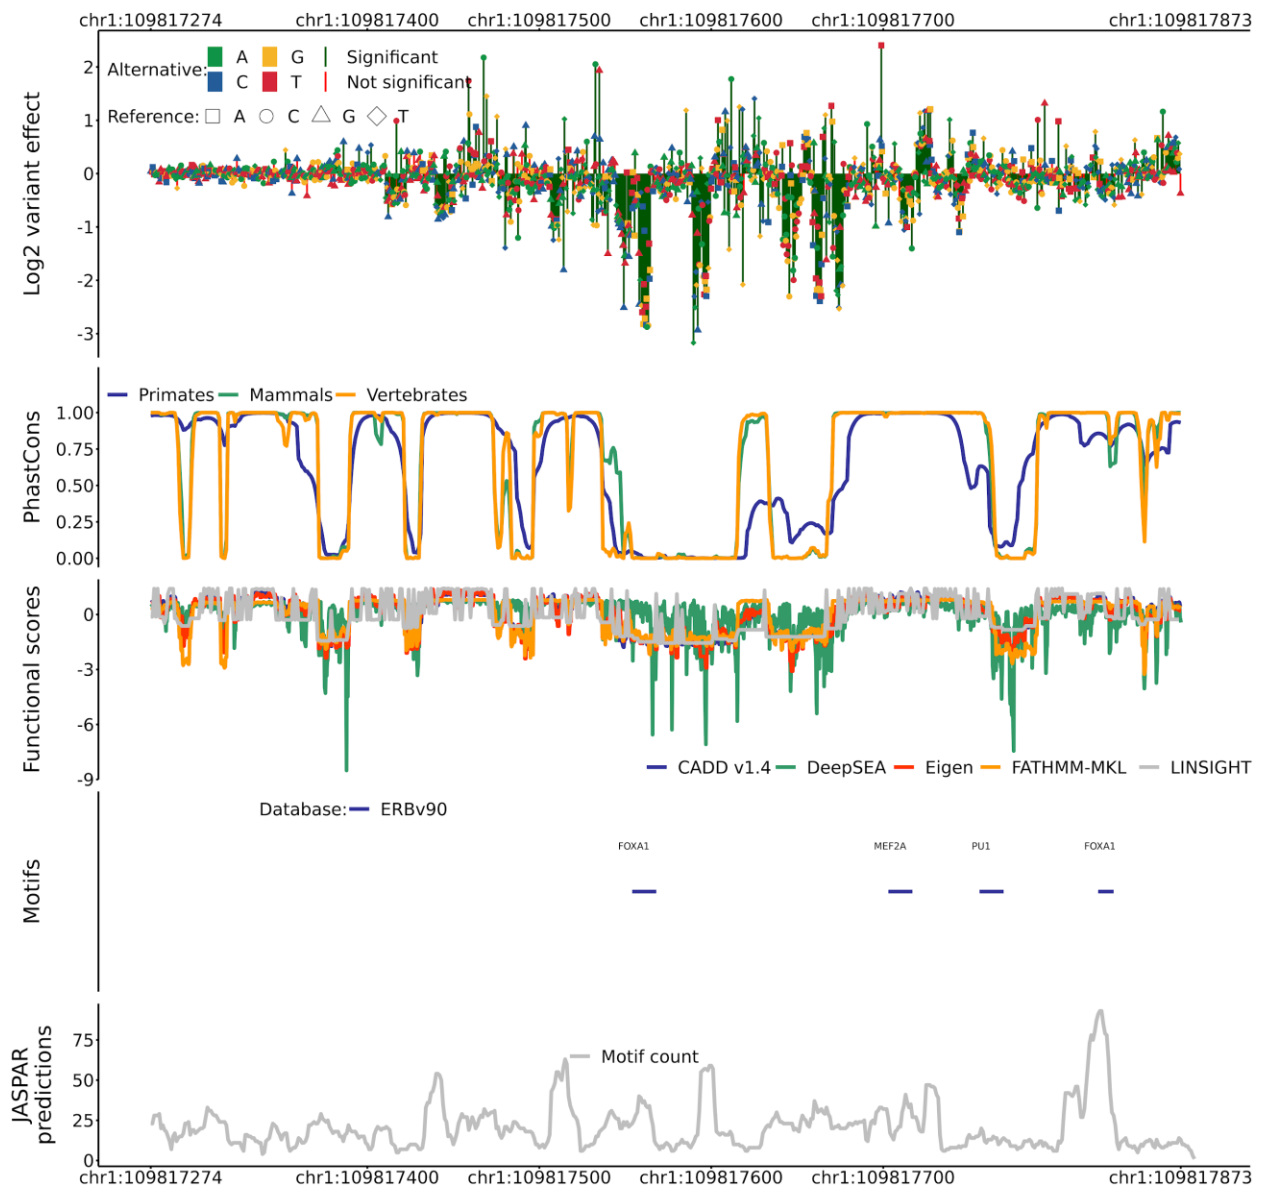

### SORT1 (Exp. 2)

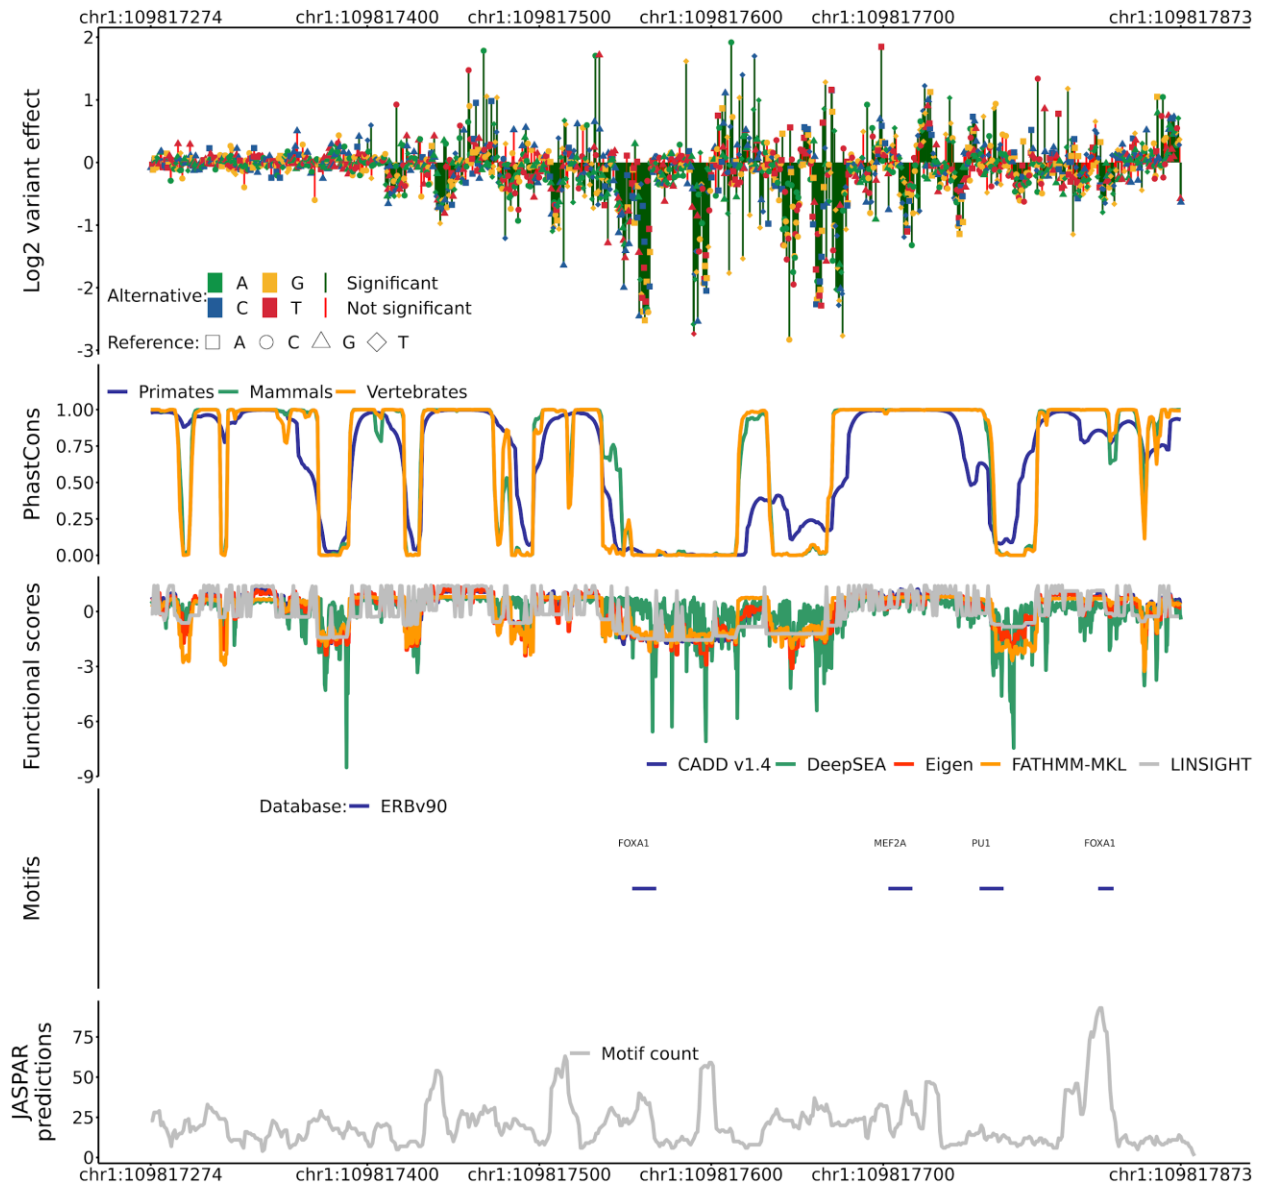



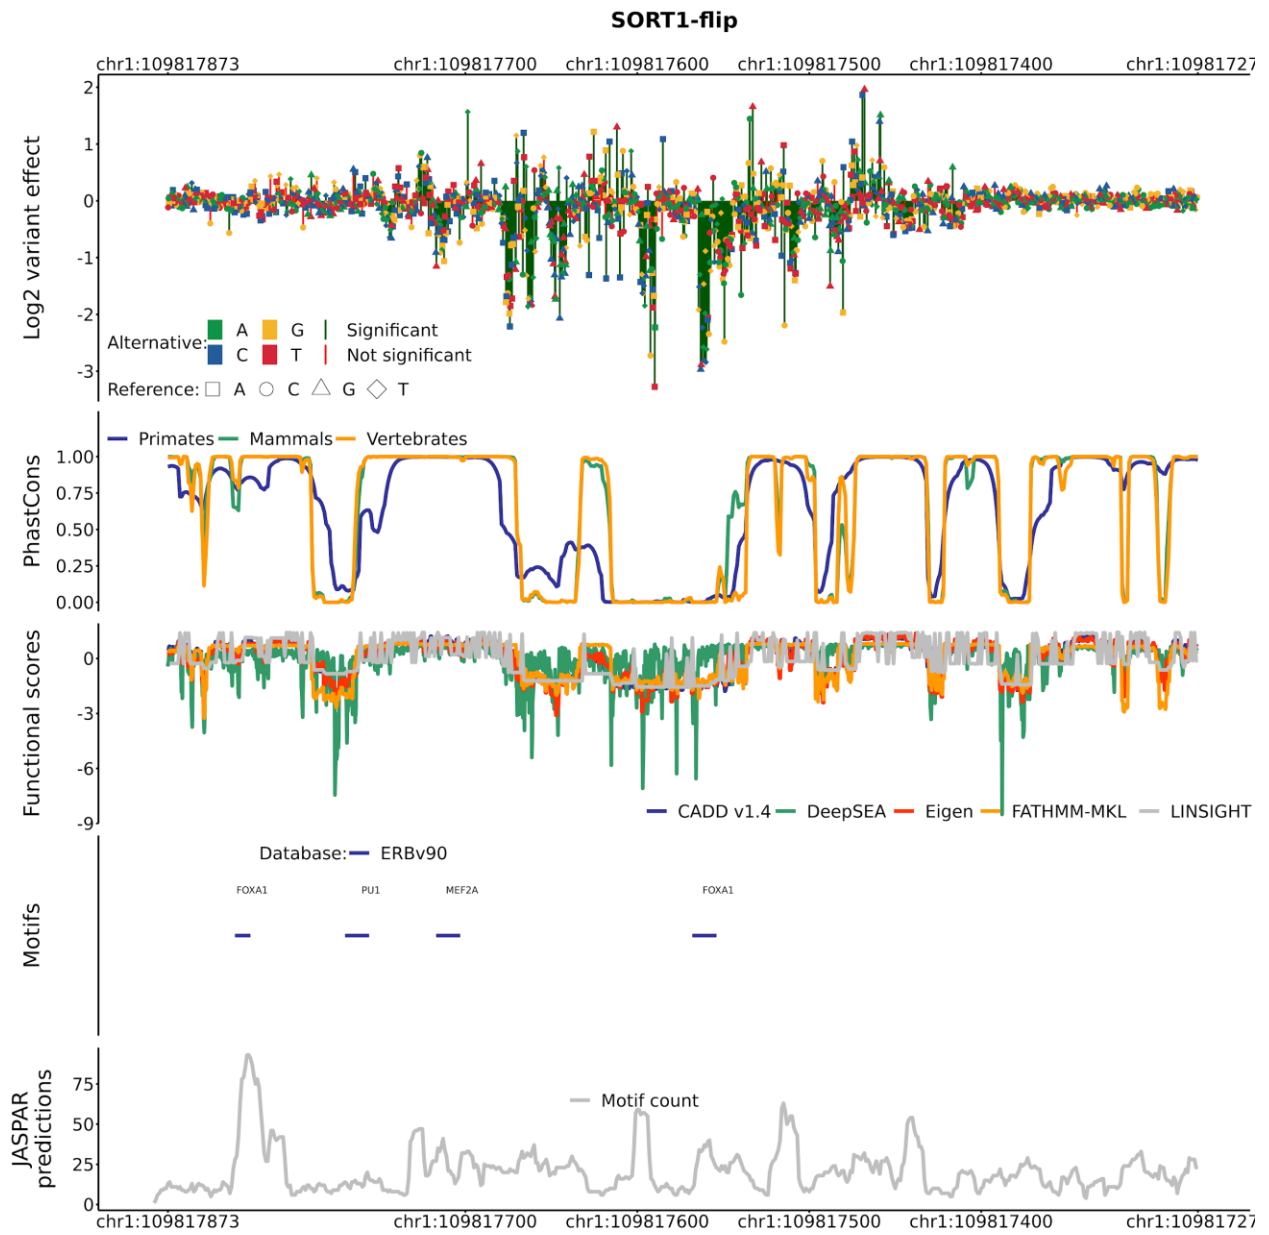

### TCF7L2

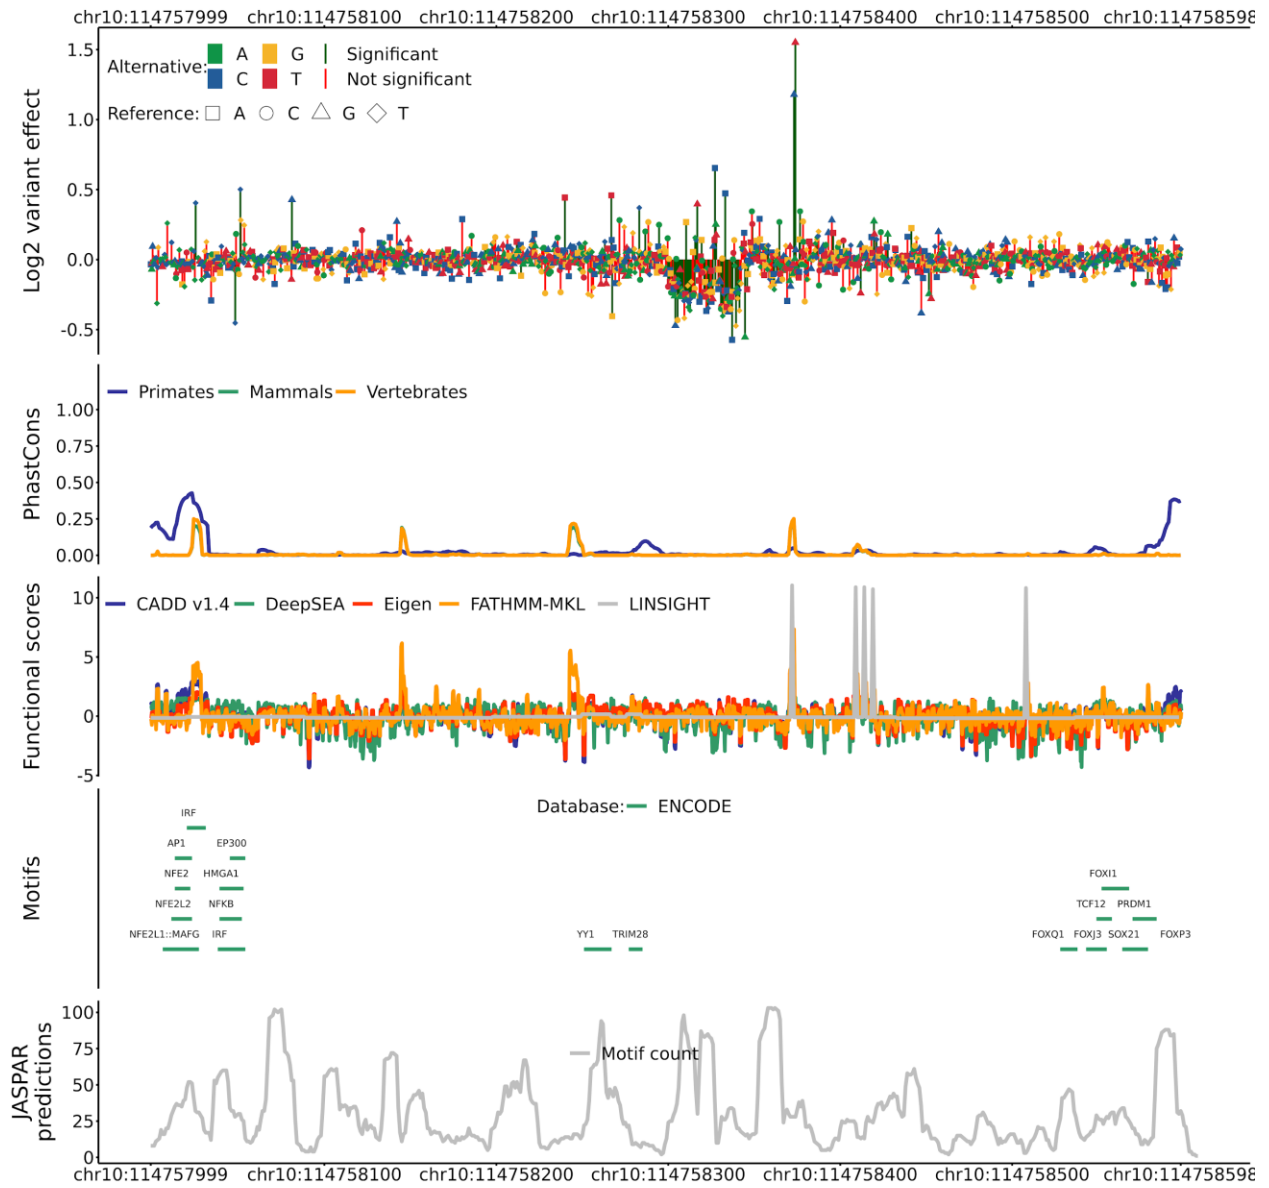

### UC88

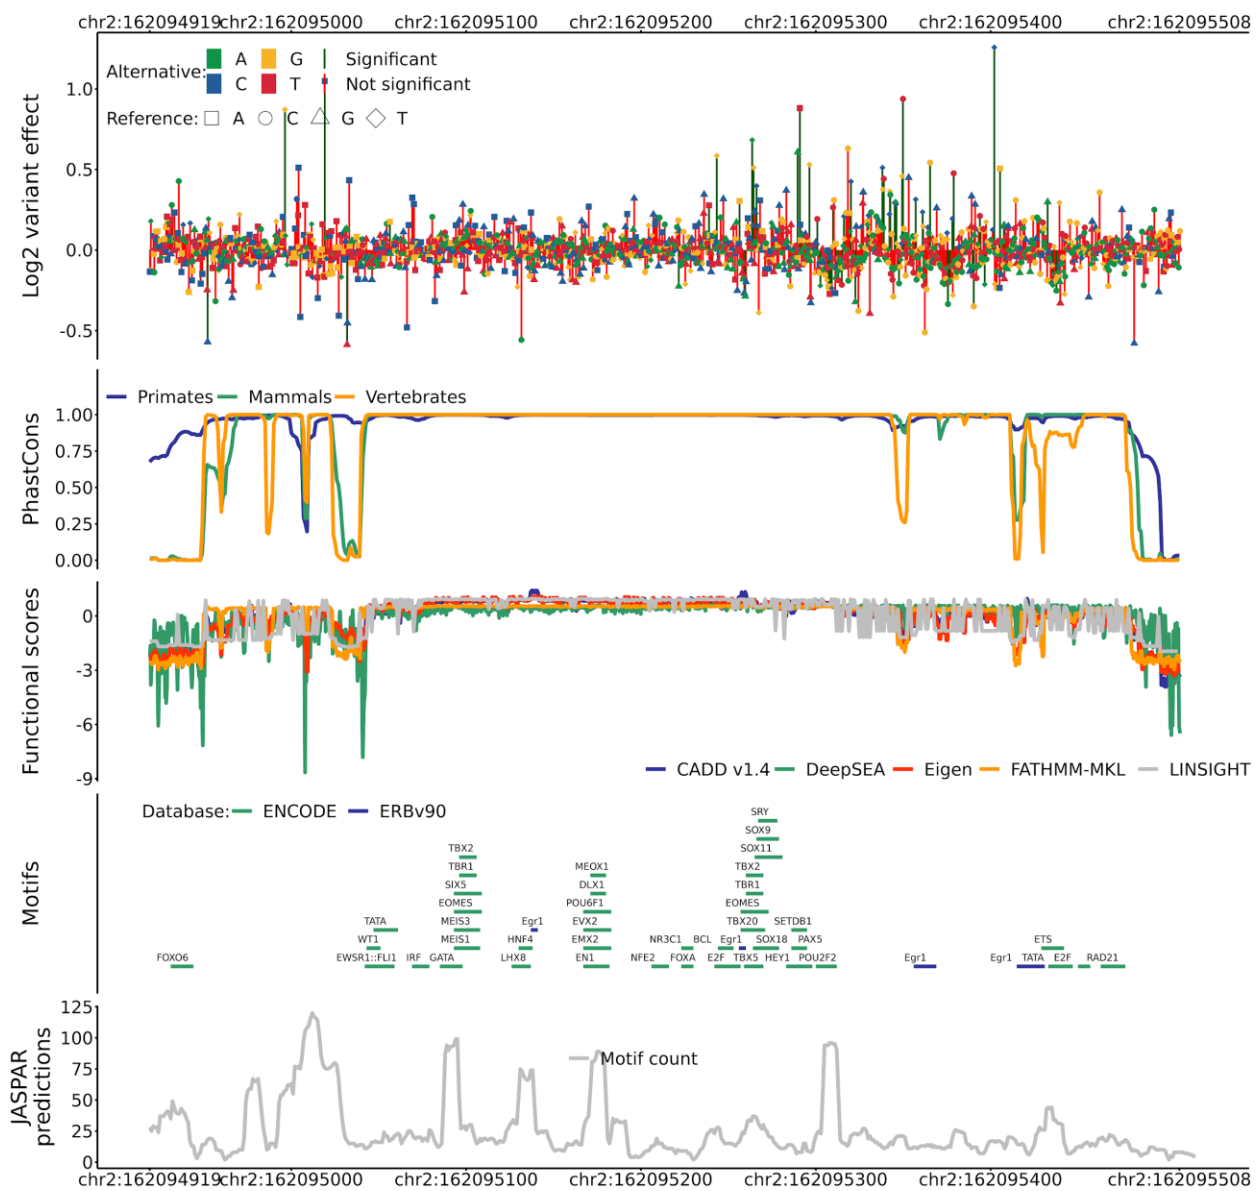

### ZFAND3

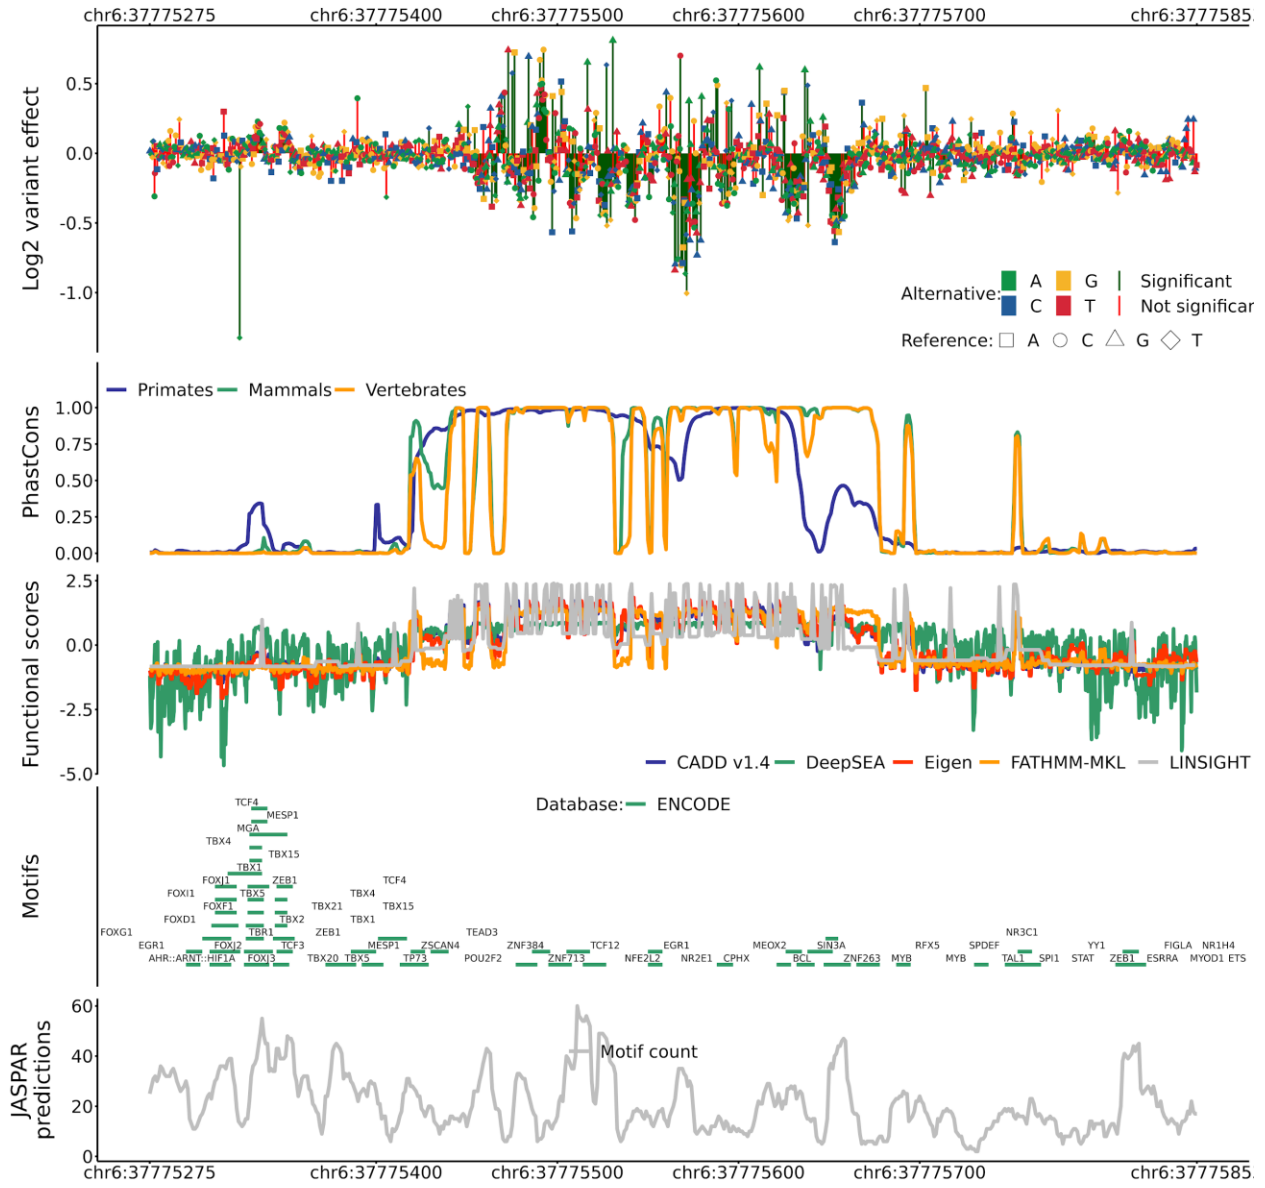

### ZRS (+h13)

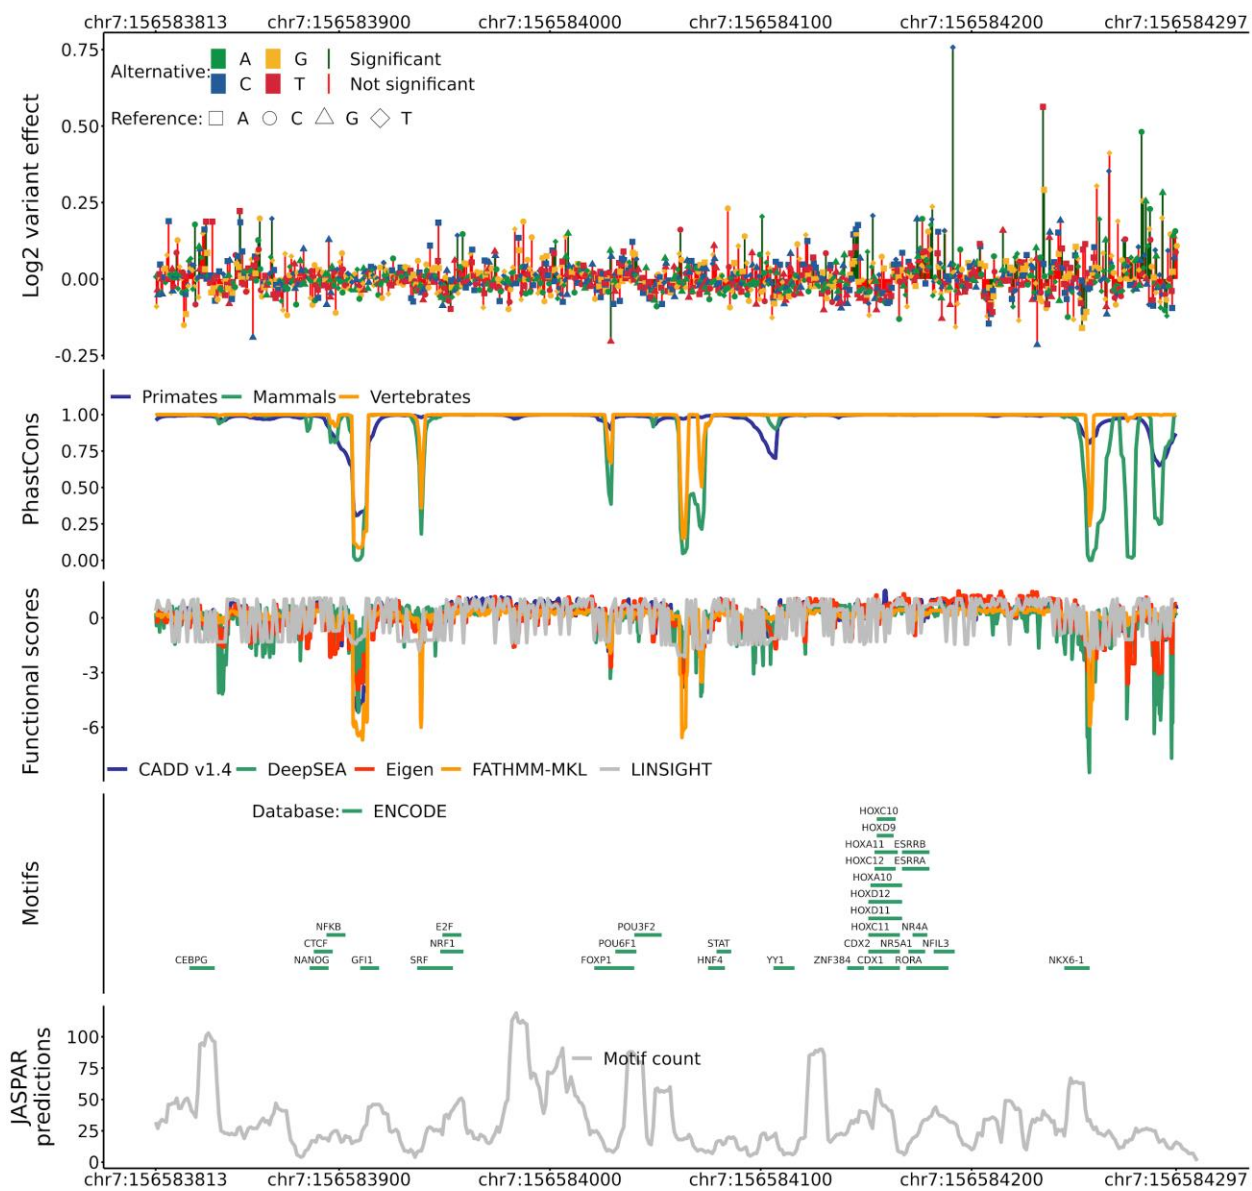

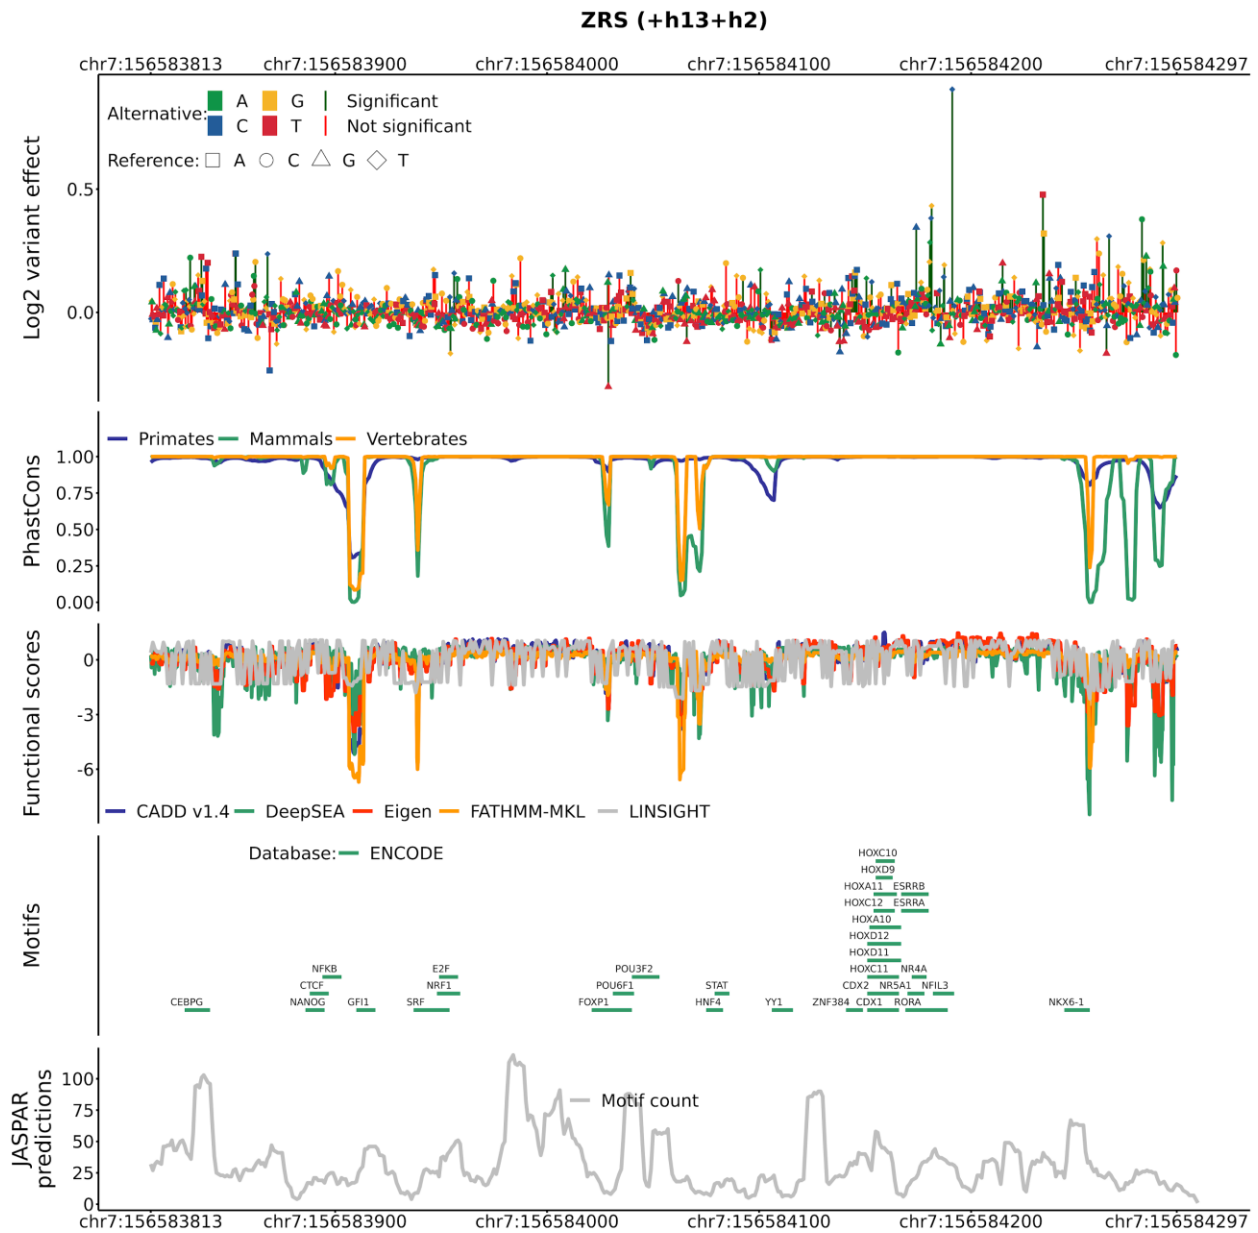

**Overlay of inferred variant effects for SNVs with available annotation data for all enhancer elements.** Motif predictions overlaid with biochemical evidence from ChIP-seq experiments were obtained from Ensembl Regulatory Build (ERB)<sup>33</sup> and ENCODE<sup>3</sup> annotations. JASPAR motif predictions were obtained from the JASPAR 2018<sup>6</sup> release.

## Supplementary Figure 10

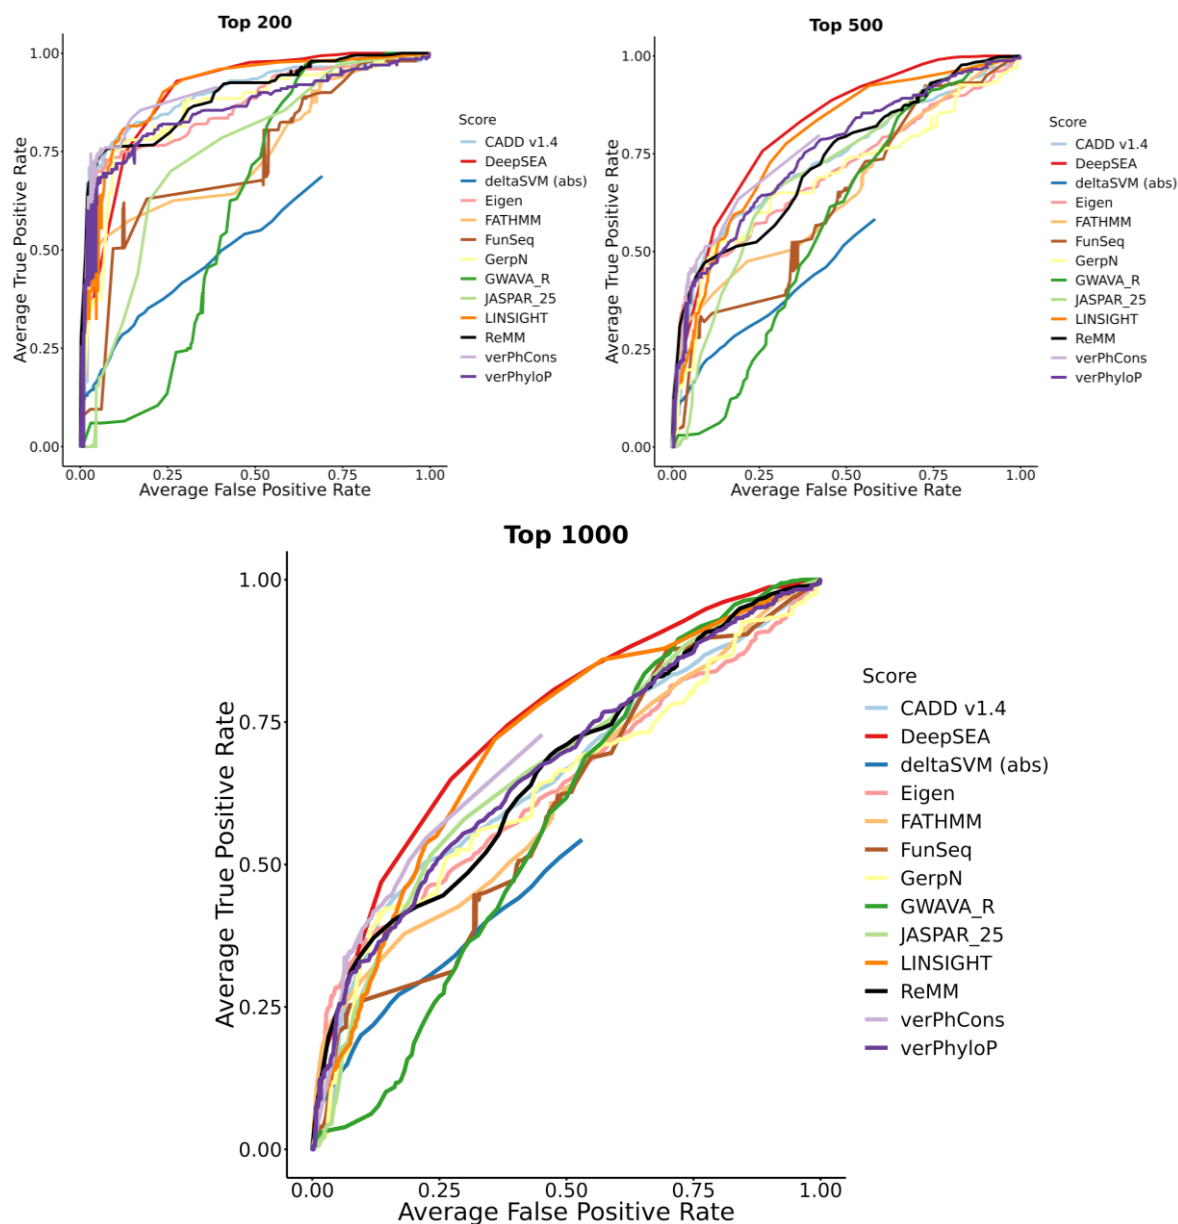

**Receiver operating characteristic curves of computational scores used for the binary classification of promoter variants.** Plots are divided into the classification of the top 200, 500 and 1000 high-effect promoter variants ( $p$ -value  $< 10^{-5}$ , min tags 10) versus the same number of random variants (per element) with no expression effect ( $\log_2$  value  $< 0.05$ , min tags 10). Curves show the average performance across 100 classification rounds (see Methods). If multiple scores exist per method, only the best score is plotted (see [Supplementary Table 16](#)).

## Supplementary Figure 11

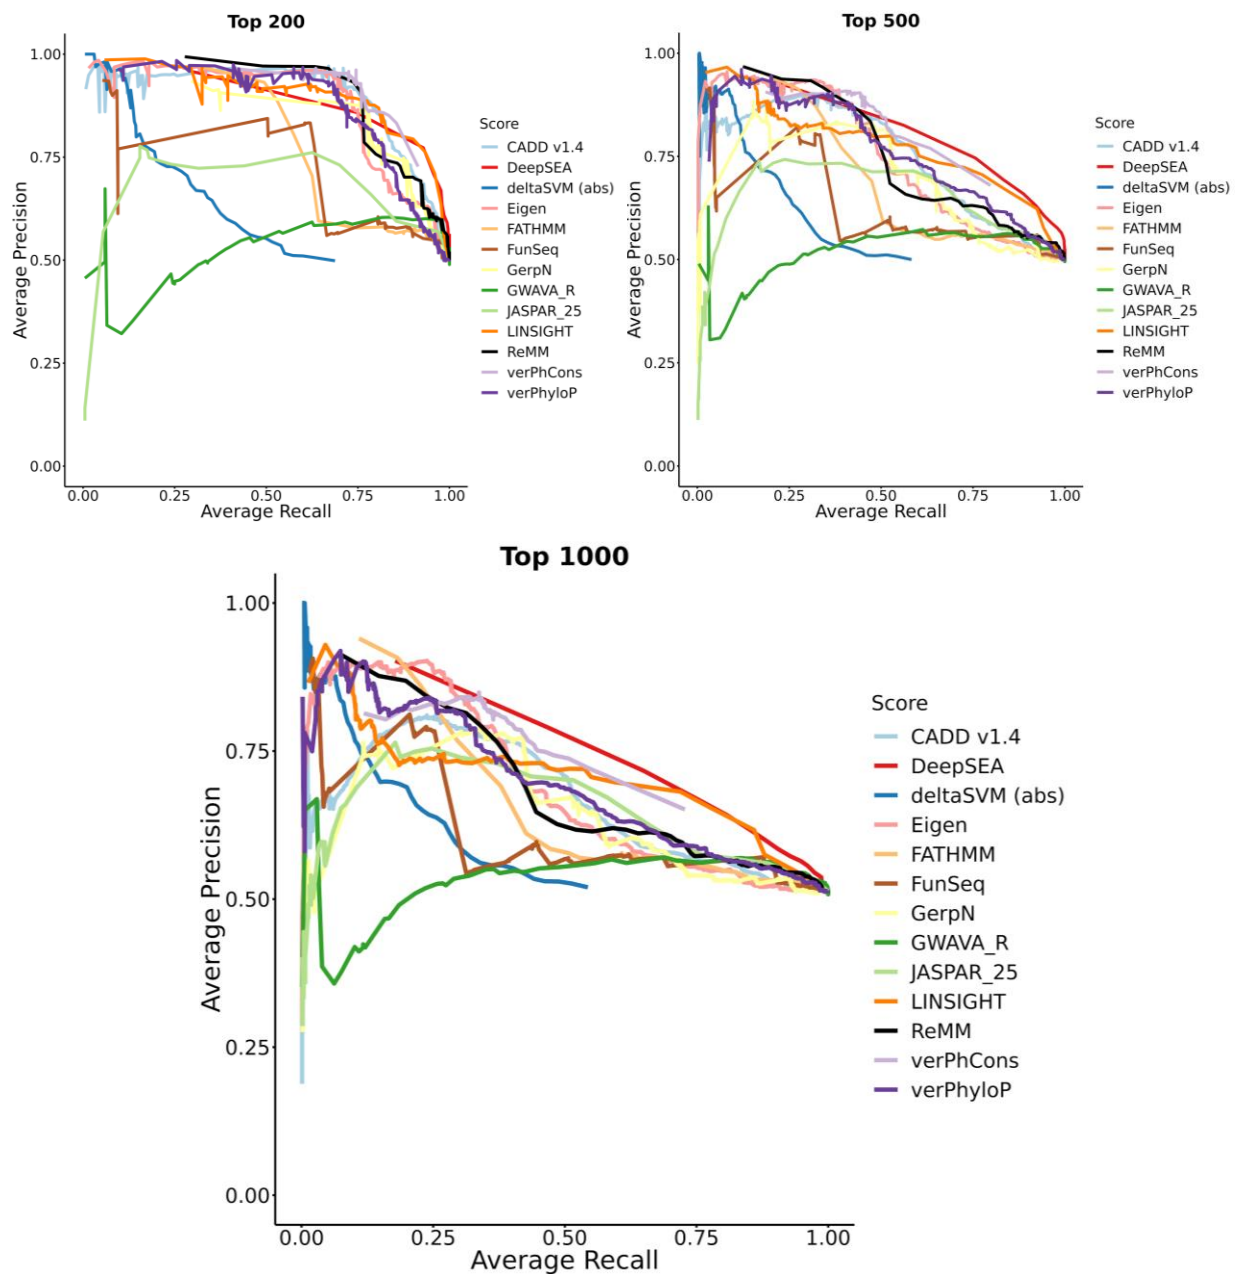

**Precision-recall curves of computational scores used for the binary classification of promoter variants.** Plots are divided into the classification of the top 200, 500 and 1000 high-effect promoter variants ( $p$ -value  $< 10^{-5}$ , min tags 10) versus the same number of random variants (per element) with no expression effect ( $\log_2$  value  $< 0.05$ , min tags 10). Curves show the average across 100 classification rounds (see Methods). If multiple scores exist per method, only the best score is plotted (see [Supplementary Table 16](#)).



## Supplementary Figure 12

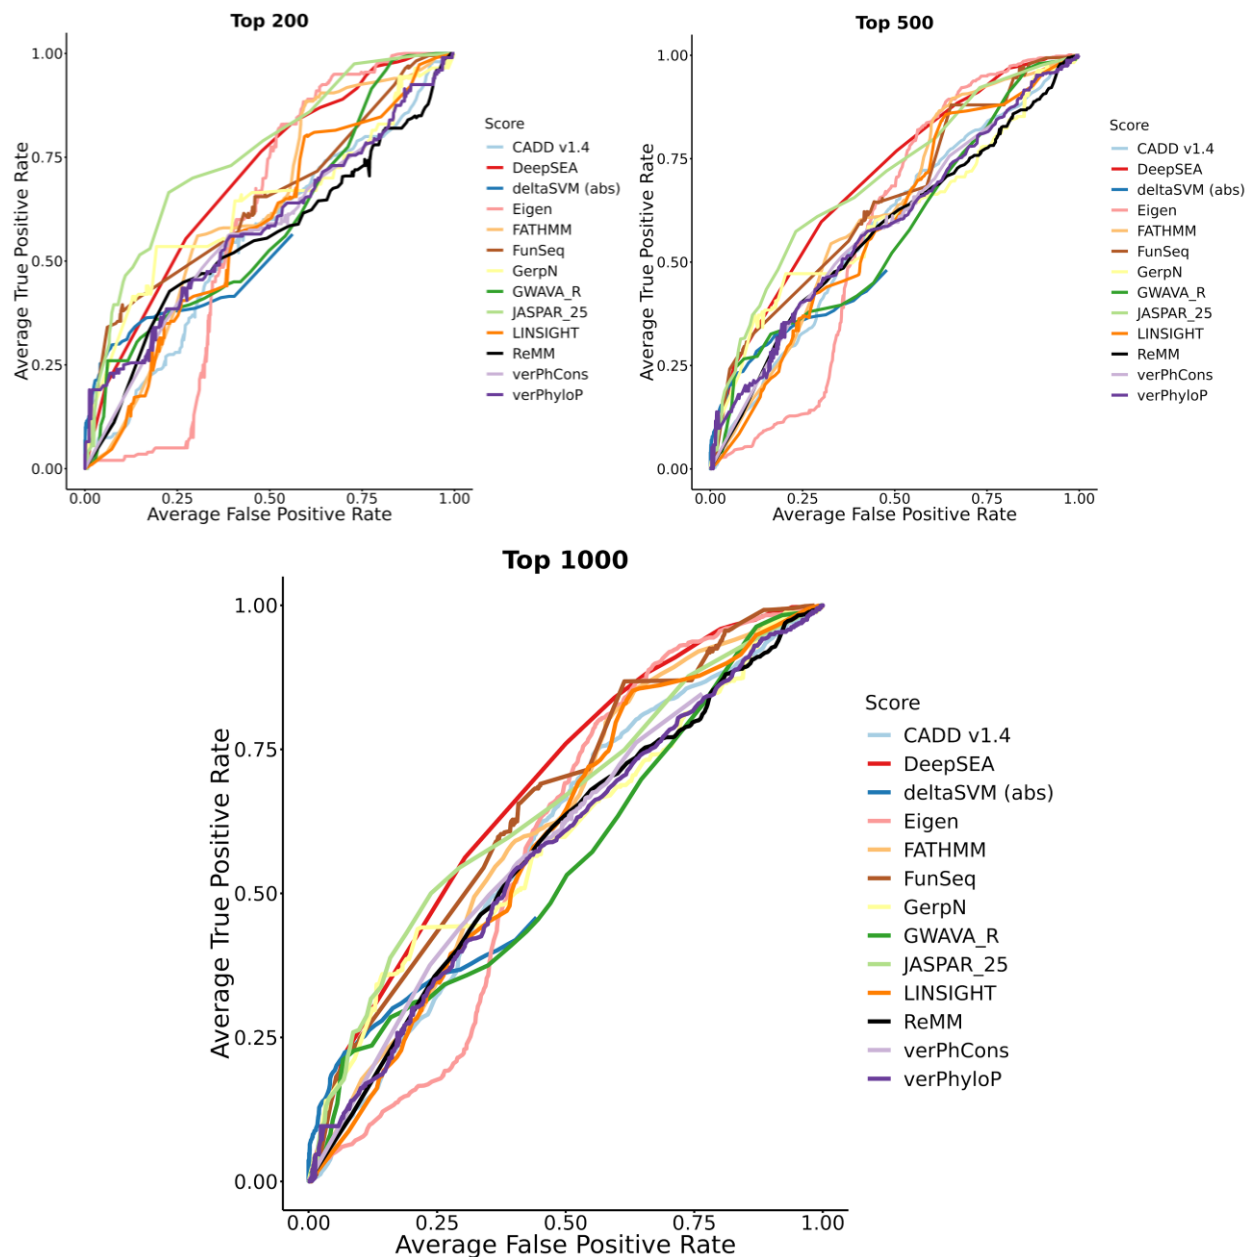

**Receiver operating characteristic curves of computational scores used for the binary classification of enhancer variants.** Plots are divided into the classification of the top 200, 500 and 1000 high-effect enhancer variants ( $p$ -value  $< 10^{-5}$ , min tags 10) versus the same number of random variants (per element) with no expression effect ( $\log_2$  expression effect  $< 0.05$ , min tags 10). Curves show the average across 100 classification rounds (see Methods). If multiple scores exist per method, only the best score is plotted (see [Supplementary Table 17](#)).

### Supplementary Figure 13

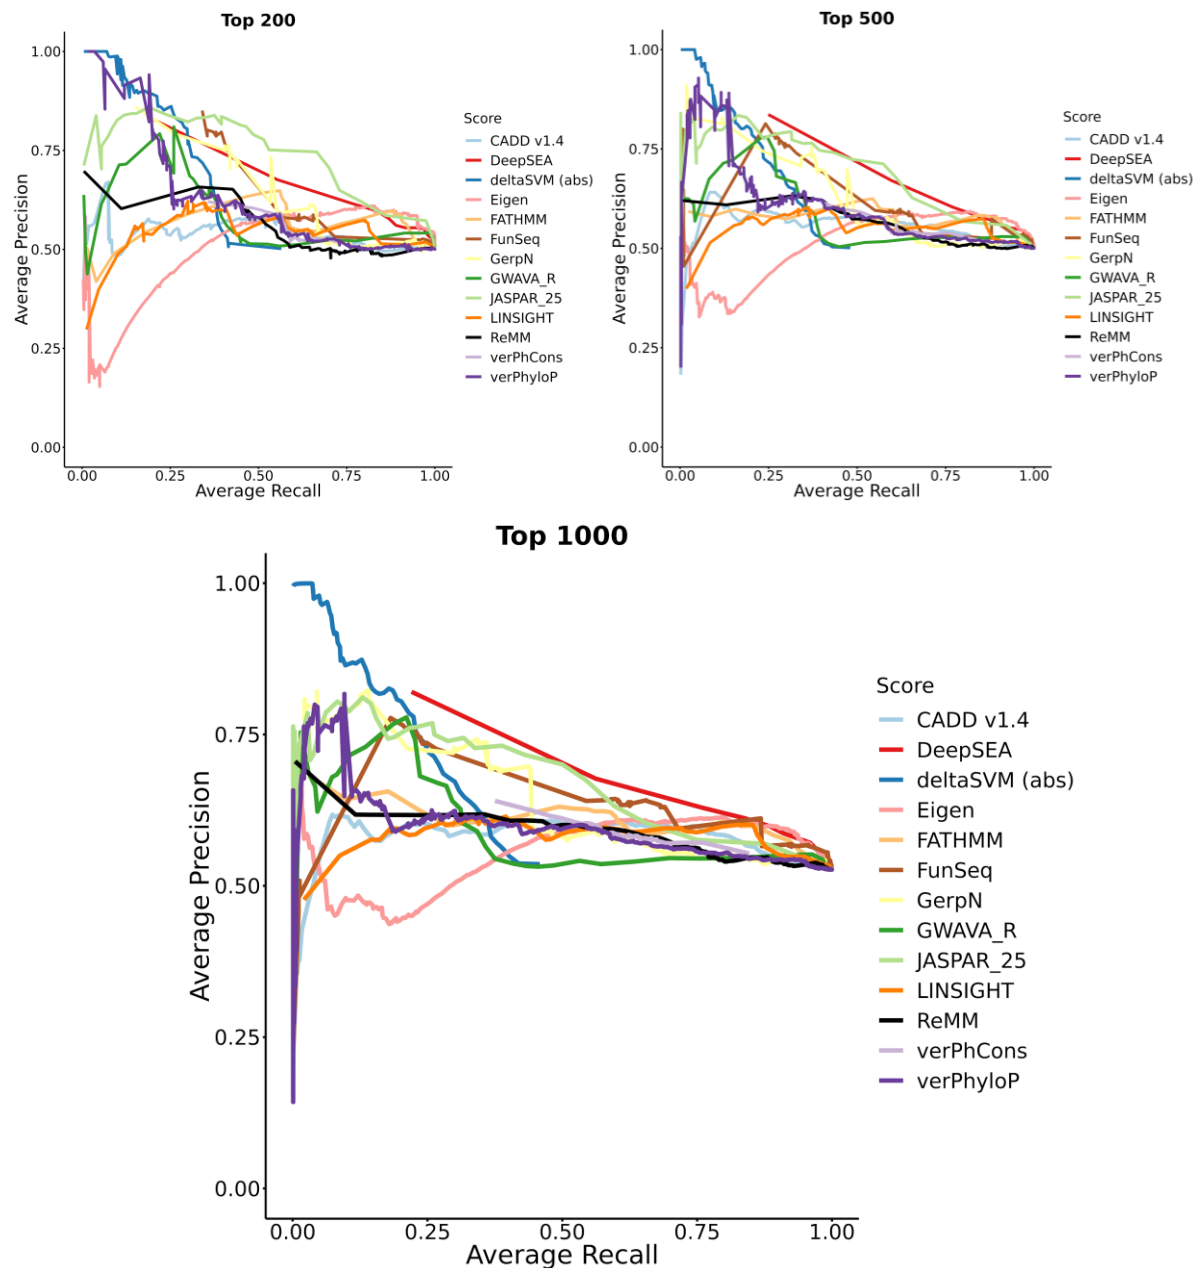

**Precision-recall curves of computational scores used for the binary classification of enhancer variants.** Plots are divided into the classification of the top 200, 500, and 1000 high-effect enhancer variants ( $p$ -value  $< 10^{-5}$ , min tags 10) versus the same number of random variants (per element) with no expression effect ( $\log_2$  expression effect  $< 0.05$ , min tags 10). Curves show the average across 100 classification rounds (see Methods). If multiple scores exist per method only the best score is plotted (see [Supplementary Table 17](#)).

## Supplementary Tables

### Supplementary Table 1

**Tested promoter sequences.** Note that the construct length of MSMB is 2 bp longer than the described reference genome coordinate range, due to an insertion polymorphism present in the construct. Vector sequences for pGL4.11b and pGL4.11c are available for download from NCBI GenBank (accessions MK484103 and MK484104, respectively) and from our [OSF project 75B2M](#).

| Name              | Genomic coordinates (GRCh37/GRCh38)                    | Transcript  | Associated Phenotype                        | Luciferase vector | MPRA vector | Cell line       | Tran sf. time (hr) | Fold Ch. (Wild type) | Fold Ch. (MPRA) | Con struc t size (bp) |
|-------------------|--------------------------------------------------------|-------------|---------------------------------------------|-------------------|-------------|-----------------|--------------------|----------------------|-----------------|-----------------------|
| <i>F9</i>         | X:138,612,622-138,612,924<br>X:139,530,463-139,530,765 | NM_000133.3 | Hemophilia B                                | pGL4.11b          | pGL4.11c    | HepG2           | 24                 | 2.6                  | 2.1             | 303                   |
| <i>FOXE1</i>      | 9:100,615,537-100,616,136<br>9:97,853,255-97,853,854   | NM_004473.3 | Thyroid cancer                              | pGL4.11b          | pGL4.11c    | HeLa            | 24                 | 4.2                  | 2.5             | 600                   |
| <i>GP1BB</i>      | 22:19,710,789-19,711,173<br>22:19,723,266-19,723,650   | NM_000407.4 | Bernard-Soulier Syndrome                    | pGL4.11b          | pGL4.11c    | HEL 92.1.7      | 24                 | 22.1                 | 12.3            | 385                   |
| <i>HBB</i>        | 11:5,248,252-5,248,438<br>11:5,227,022-5,227,208       | NM_000518.4 | Thalassemia                                 | pGL4.11b          | pGL4.11c    | HEL 92.1.7      | 24                 | 14.3                 | 8.4             | 187                   |
| <i>HBG1</i>       | 11:5,271,035-5,271,308<br>11:5,249,805-5,250,078       | NM_000559.2 | Hereditary persistence of fetal hemoglobin  | pGL4.11b          | pGL4.11c    | HEL 92.1.7      | 24                 | 118.1                | 41.8            | 274                   |
| <i>HNF4A (P2)</i> | 20:42,984,160-42,984,444<br>20:44,355,520-44,355,804   | NM_175914.4 | Maturity-onset diabetes of the young (MODY) | pGL4.11b          | pGL4.11c    | HEK293T         | 24                 | 2.8                  | 1.3             | 285                   |
| <i>LDLR</i>       | 19:11,199,907-11,200,224<br>19:11,089,231-11,089,548   | NM_000527.4 | Familial hypercholesterol emia              | pGL4.11b          | pGL4.11b    | HepG2           | 24                 | 110.7                | 76.6            | 318                   |
| <i>MSMB</i>       | 10:51,548,988-51,549,578<br>10:46,046,244-46,046,834   | NM_002443.3 | Prostate cancer                             | pGL4.11b          | pGL4.11c    | HEK293T         | 24                 | 8.4                  | 3.4             | 593                   |
| <i>PKLR</i>       | 1:155,271,186-155,271,655<br>1:155,301,395-155,301,864 | NM_000298.5 | Pyruvate kinase deficiency                  | pGL4.11b          | pGL4.11c    | K562            | 48                 | 29.4                 | 9.6             | 470                   |
| <i>TERT</i>       | 5:1,295,104-1,295,362<br>5:1,294,989-1,295,247         | NM_198253.2 | Various types of cancer                     | pGL4.11b          | pGL4.11b    | HEK293T, SF7996 | 24                 | 231.8, 5.2           | 148.2, 2.7      | 259                   |

## Supplementary Table 2

**Tested enhancer sequences.** Note that the construct length of MYC (rs11986220) is 1 bp longer than the described reference genome coordinate range, due to an insertion polymorphism present in the construct. Human ZRS (hZRS, a limb-specific enhancer of the Sonic hedgehog gene) was co-transfected with HOXD13 and HOXD13+HAND2. UC88 is an ultraconserved element, which has not been previously associated with a phenotype. Vector sequences for pGL3c, pGL4.23c/d, and pGL4Zc are available for download from NCBI GenBank (accessions MK484107, MK484105/MK484106, and MK484108, respectively) and our [OSF project 75B2M](#).

| Name                     | Genomic coordinates (GRCh37/GRCh38)                      | Associated Phenotype                                               | Luciferase vector   | MPRA vector | Cell line                          | Transf. time (hr)              | Fold Ch. (Wild type) | Fold Ch. (MPRA) | Construct (bp) |
|--------------------------|----------------------------------------------------------|--------------------------------------------------------------------|---------------------|-------------|------------------------------------|--------------------------------|----------------------|-----------------|----------------|
| <i>BCL11A</i> +58        | 2:60,722,075-60,722,674<br>2:60,494,940-60,495,539       | Sickle cell disease                                                | pGL4.23             | pGL4.23d    | HEL 92.1.7                         | 24                             | 2.5                  | 1.7             | 600            |
| <i>IRF4</i>              | 6:396,143-396,593<br>6:396,143-396,593                   | Human pigmentation                                                 | pGL4.23             | pGL4.23d    | SK-MEL-28                          | 24                             | 44.5                 | 16.3            | 451            |
| <i>IRF6</i>              | 1:209,989,135-209,989,735<br>1:209,815,790-209,816,390   | Cleft lip                                                          | pGL4.23             | pGL4.23c    | HaCaT                              | 24                             | 17.0                 | 16.7            | 600            |
| <i>MYC</i> (rs 6983267)  | 8:128,413,074-128,413,673<br>8:127,400,829-127,401,428   | Various types of cancer                                            | pGL4.23             | pGL4.23c    | HEK293T                            | 32, 20nM LiCl added after 24hr | 2.8                  | 0.7             | 600            |
| <i>MYC</i> (rs 11986220) | 8:128,531,515-128,531,977<br>8:127,519,270-127,519,732   | Various types of cancer                                            | pGL4.23             | pGL4.23d    | LNCaP + 100nM DHT                  | 24                             | 5.5                  | 3.2             | 464            |
| <i>RET</i>               | 10:43,581,927-43,582,526<br>10:43,086,479-43,087,078     | Hirschsprung                                                       | pGL3                | pGL3c       | Neuro-2a                           | 24                             | 2.0                  | 0.9             | 600            |
| <i>SORT1</i>             | 1:109,817,274-109,817,873<br>1:109,274,652-109,275,251   | Plasma low-density lipoprotein cholesterol & myocardial infarction | pGL4.23             | pGL4.23c    | HepG2                              | 24                             | 235.3                | 202.2           | 600            |
| <i>TCF7L2</i>            | 10:114,757,999-114,758,598<br>10:112,998,240-112,998,839 | Type 2 diabetes                                                    | pGL4.23             | pGL4.23d    | MIN6                               | 24                             | 9.0                  | 2.7             | 600            |
| <i>UC88</i>              | 2:162,094,919-162,095,508<br>2:161,238,408-161,238,997   | -                                                                  | pGL4.23             | pGL4.23c    | Neuro-2a                           | 24                             | 9.3                  | 5.4             | 590            |
| <i>ZFAND3</i>            | 6:37,775,275-37,775,853<br>6:37,807,499-37,808,077       | Type 2 diabetes                                                    | pGL4.23             | pGL4.23c    | MIN6                               | 24                             | 14.3                 | 7.3             | 579            |
| <i>ZRS</i>               | 7:156,583,813-156,584,297<br>7:156,791,119-156,791,603   | Limb malformations                                                 | TATA-pGL4m (EV087)* | pGL4Zc      | NIH/3T3 (with HOXD13/HOXD13+HAND2) | 24                             | 4.2/2.0              | 3.7/2.6         | 485            |

### Supplementary Table 3

**Saturation mutagenesis statistic.** Twenty-four tag assignments obtained by saturation mutagenesis. A minimum read coverage of three was required for reads aligning across the construct length before a tag was considered in analysis.

| Assignment       | Construct length | Associated tags | Fraction WT inserts | Variants called per insert | Mutation rate | SNV cov. | 1bp-del cov | Ave #tags per SNV | Ave #tags per 1bp-del |
|------------------|------------------|-----------------|---------------------|----------------------------|---------------|----------|-------------|-------------------|-----------------------|
| BCL11A           | 600              | 263,000         | 0.03%               | 6.00                       | 1.00%         | 100.00%  | 61.00%      | 809.1             | 40.9                  |
| F9               | 303              | 134,665         | 43.22%              | 0.96                       | 0.32%         | 99.56%   | 54.13%      | 132.7             | 20.7                  |
| FOXE1            | 600              | 148,459         | 19.61%              | 2.00                       | 0.33%         | 100.00%  | 56.50%      | 154.9             | 21.2                  |
| GP1BB            | 385              | 485,856         | 31.82%              | 1.25                       | 0.33%         | 99.91%   | 66.23%      | 488.4             | 89.8                  |
| HBB              | 187              | 2,010,638       | 55.62%              | 0.62                       | 0.33%         | 100.00%  | 71.12%      | 2064.4            | 414.5                 |
| HBG1             | 274              | 150,499         | 43.36%              | 0.92                       | 0.34%         | 100.00%  | 55.11%      | 155.7             | 31.4                  |
| HNF4A            | 285              | 555,705         | 40.47%              | 0.98                       | 0.35%         | 100.00%  | 63.16%      | 595.0             | 105.5                 |
| IRF4             | 451              | 342,770         | 25.43%              | 1.66                       | 0.37%         | 100.00%  | 63.64%      | 396.8             | 57.7                  |
| IRF6             | 601              | 33,174          | 14.03%              | 2.33                       | 0.39%         | 99.45%   | 31.45%      | 41.6              | 2.9                   |
| LDLR.2           | 318              | 159,867         | 39.27%              | 1.04                       | 0.33%         | 100.00%  | 56.92%      | 154.5             | 45.6                  |
| LDLR             | 318              | 96,145          | 17.78%              | 1.99                       | 0.62%         | 100.00%  | 58.80%      | 185.3             | 35.6                  |
| MSMB             | 593              | 738,972         | 15.72%              | 2.07                       | 0.35%         | 100.00%  | 67.12%      | 817.3             | 109.3                 |
| MYC (rs11986220) | 464              | 541,564         | 2.45%               | 2.52                       | 0.54%         | 100.00%  | 55.39%      | 884.1             | 73.7                  |
| MYC (rs6983267)  | 600              | 70,234          | 16.34%              | 2.05                       | 0.34%         | 99.67%   | 43.33%      | 75.4              | 8.8                   |
| PKLR             | 470              | 119,675         | 22.88%              | 1.75                       | 0.37%         | 99.93%   | 45.74%      | 125.5             | 12.7                  |
| RET              | 600              | 257,630         | 29.19%              | 1.51                       | 0.25%         | 99.94%   | 55.50%      | 199.6             | 41.5                  |
| SORT1.2          | 600              | 132,222         | 15.78%              | 2.07                       | 0.34%         | 99.94%   | 49.83%      | 139.5             | 27.3                  |
| SORT1-flip       | 600              | 192,602         | 21.12%              | 1.73                       | 0.29%         | 99.61%   | 50.83%      | 169.8             | 31.7                  |
| SORT1            | 600              | 45,509          | 12.78%              | 2.29                       | 0.38%         | 99.72%   | 41.67%      | 53.9              | 9.0                   |
| TCF7L2           | 600              | 120,996         | 19.03%              | 1.85                       | 0.31%         | 99.06%   | 42.33%      | 119.8             | 9.9                   |
| TERT             | 259              | 276,048         | 19.22%              | 1.76                       | 0.68%         | 100.00%  | 57.53%      | 549.3             | 103.9                 |
| UC88             | 590              | 87,948          | 11.16%              | 2.44                       | 0.41%         | 99.77%   | 52.71%      | 111.1             | 17.2                  |
| ZFAND3           | 579              | 183,352         | 6.52%               | 3.00                       | 0.52%         | 99.94%   | 63.21%      | 297.5             | 38.4                  |
| ZRS              | 485              | 850,422         | 16.94%              | 2.07                       | 0.43%         | 100.00%  | 66.19%      | 1130.2            | 192.9                 |

### Supplementary Table 4

Obtained RNA and DNA tag counts across 29 experiments with each 3 transfection replicates. MYC (rs11986220) was abbreviated to MYCs1. MYC (rs6983267) was abbreviated to MYCs2. TERT-GBM-SiGABPA and TERT-GBM-SiScramble were abbreviated to TERT-GAa and TERT-GSc, respectively.

| Exp.     | Tags    | DNA        | RNA        | Assign. tags | [%]  | DNA assigned | [%]  | RNA assigned | [%]  | WT tags | [%]  | Variants  | Var/tag |
|----------|---------|------------|------------|--------------|------|--------------|------|--------------|------|---------|------|-----------|---------|
| BCL11A-1 | 298,966 | 5,639,266  | 12,078,937 | 219,172      | 73.3 | 4,782,063    | 84.8 | 10,265,384   | 85.0 | 63      | 0.0  | 1,295,570 | 5.6     |
| BCL11A-2 | 285,273 | 5,482,187  | 7,401,487  | 218,289      | 76.5 | 4,660,218    | 85.0 | 6,302,212    | 85.1 | 64      | 0.0  | 1,290,502 | 5.9     |
| BCL11A-3 | 298,554 | 4,098,878  | 18,055,670 | 218,565      | 73.2 | 3,466,623    | 84.6 | 15,372,758   | 85.1 | 65      | 0.0  | 1,291,930 | 5.9     |
| F9-1     | 342,802 | 4,373,175  | 2,377,127  | 110,714      | 32.3 | 2,941,983    | 67.3 | 1,532,333    | 64.5 | 48,303  | 43.6 | 104,215   | 0.9     |
| F9-2     | 393,783 | 5,913,265  | 3,343,343  | 114,478      | 29.1 | 3,895,338    | 65.9 | 2,142,187    | 64.1 | 50,414  | 44.0 | 106,735   | 0.9     |
| F9-3     | 399,823 | 5,288,624  | 3,885,413  | 114,669      | 28.7 | 3,467,454    | 65.6 | 2,489,575    | 64.1 | 50,479  | 44.0 | 106,929   | 0.9     |
| FOXE1-1  | 371,106 | 5,844,884  | 12,244,334 | 104,919      | 28.3 | 5,071,439    | 86.8 | 10,307,674   | 84.2 | 21,761  | 20.7 | 202,298   | 1.9     |
| FOXE1-2  | 403,744 | 6,652,522  | 14,494,525 | 107,339      | 26.6 | 5,746,967    | 86.4 | 12,188,942   | 84.1 | 22,141  | 20.6 | 207,434   | 1.9     |
| FOXE1-3  | 343,043 | 5,769,389  | 9,841,232  | 101,484      | 29.6 | 5,048,490    | 87.5 | 8,271,983    | 84.1 | 21,082  | 20.8 | 195,486   | 1.9     |
| GP1BB-1  | 486,707 | 6,643,587  | 43,000,079 | 355,564      | 73.1 | 6,072,911    | 91.4 | 39,803,462   | 92.6 | 119,228 | 33.5 | 424,334   | 1.2     |
| GP1BB-2  | 578,012 | 6,367,523  | 83,229,576 | 380,180      | 65.8 | 5,752,248    | 90.3 | 77,001,869   | 92.5 | 126,862 | 33.4 | 455,869   | 1.2     |
| GP1BB-3  | 523,517 | 6,606,471  | 54,650,491 | 366,222      | 70.0 | 6,013,969    | 91.0 | 50,533,028   | 92.5 | 122,381 | 33.4 | 438,316   | 1.2     |
| HBB-1    | 695,586 | 2,525,201  | 6,773,900  | 472,421      | 67.9 | 1,900,539    | 75.3 | 4,963,191    | 73.3 | 262,233 | 55.5 | 294,795   | 0.6     |
| HBB-2    | 791,164 | 3,308,597  | 9,589,115  | 528,865      | 66.8 | 2,472,343    | 74.7 | 6,979,796    | 72.8 | 293,299 | 55.5 | 330,805   | 0.6     |
| HBB-3    | 762,560 | 3,072,583  | 9,994,200  | 511,302      | 67.1 | 2,299,623    | 74.8 | 7,295,451    | 73.0 | 283,360 | 55.4 | 319,728   | 0.6     |
| HBG1-1   | 185,967 | 5,162,824  | 14,791,792 | 120,433      | 64.8 | 4,949,744    | 95.9 | 14,271,858   | 96.5 | 53,434  | 44.4 | 107,176   | 0.9     |
| HBG1-2   | 175,408 | 5,018,528  | 12,030,988 | 120,273      | 68.6 | 4,820,630    | 96.1 | 11,613,726   | 96.5 | 53,323  | 44.3 | 107,094   | 0.9     |
| HBG1-3   | 184,771 | 4,015,818  | 16,150,944 | 120,736      | 65.3 | 3,837,946    | 95.6 | 15,589,891   | 96.5 | 53,489  | 44.3 | 107,672   | 0.9     |
| HNF4A-1  | 543,584 | 10,113,379 | 13,852,568 | 463,549      | 85.3 | 9,618,823    | 95.1 | 13,191,109   | 95.2 | 190,726 | 41.1 | 446,023   | 1.0     |
| HNF4A-2  | 542,733 | 8,186,687  | 14,864,839 | 462,195      | 85.2 | 7,774,829    | 95.0 | 14,159,802   | 95.3 | 190,130 | 41.1 | 444,659   | 1.0     |
| HNF4A-3  | 561,090 | 9,046,256  | 19,619,664 | 464,283      | 82.7 | 8,580,599    | 94.9 | 18,684,171   | 95.2 | 191,001 | 41.1 | 446,731   | 1.0     |
| IRF4-1   | 728,932 | 32,932,153 | 27,880,905 | 284,578      | 39.0 | 30,206,386   | 91.7 | 25,292,566   | 90.7 | 75,644  | 26.6 | 450,535   | 1.6     |
| IRF4-2   | 567,407 | 29,656,398 | 15,481,379 | 277,818      | 49.0 | 27,343,569   | 92.2 | 14,048,886   | 90.7 | 74,623  | 26.9 | 435,912   | 1.6     |
| IRF4-3   | 740,887 | 31,370,721 | 29,406,932 | 282,446      | 38.1 | 28,740,624   | 91.6 | 26,627,825   | 90.5 | 75,361  | 26.7 | 445,782   | 1.6     |
| IRF6-1   | 151,722 | 9,739,620  | 8,560,920  | 25,571       | 16.9 | 9,387,362    | 96.4 | 8,135,409    | 95.0 | 3,200   | 12.5 | 60,112    | 2.4     |
| IRF6-2   | 119,932 | 7,757,534  | 5,329,576  | 25,366       | 21.2 | 7,495,059    | 96.6 | 5,057,007    | 94.9 | 3,175   | 12.5 | 59,593    | 2.3     |
| IRF6-3   | 172,660 | 8,680,655  | 14,173,746 | 25,715       | 14.9 | 8,324,169    | 95.9 | 13,503,071   | 95.3 | 3,222   | 12.5 | 60,449    | 2.4     |
| LDLR-1   | 130,525 | 5,638,805  | 1,273,404  | 49,591       | 38.0 | 5,105,608    | 90.5 | 1,064,829    | 83.6 | 9,909   | 20.0 | 90,699    | 1.8     |
| LDLR-2   | 161,476 | 4,213,346  | 2,399,123  | 54,118       | 33.5 | 3,761,940    | 89.3 | 2,017,701    | 84.1 | 10,524  | 19.4 | 100,845   | 1.9     |
| LDLR-3   | 161,006 | 4,749,497  | 2,363,067  | 53,263       | 33.1 | 4,256,408    | 89.6 | 1,986,608    | 84.1 | 10,462  | 19.6 | 98,735    | 1.9     |
| LDLR.2-1 | 191,367 | 4,867,064  | 17,645,358 | 126,173      | 65.9 | 4,508,376    | 92.6 | 16,491,468   | 93.5 | 51,876  | 41.1 | 122,565   | 1.0     |
| LDLR.2-2 | 190,807 | 4,788,780  | 18,280,817 | 126,106      | 66.1 | 4,435,204    | 92.6 | 17,086,851   | 93.5 | 51,828  | 41.1 | 122,517   | 1.0     |
| LDLR.2-3 | 193,991 | 5,181,072  | 17,957,299 | 126,228      | 65.1 | 4,800,137    | 92.6 | 16,776,656   | 93.4 | 51,907  | 41.1 | 122,565   | 1.0     |
| MSMB-1   | 685,961 | 6,701,186  | 17,507,026 | 601,035      | 87.6 | 6,224,222    | 92.9 | 16,299,420   | 93.1 | 97,346  | 16.2 | 1,221,342 | 2.0     |
| MSMB-2   | 682,883 | 7,320,007  | 13,849,695 | 601,313      | 88.1 | 6,805,746    | 93.0 | 12,888,944   | 93.1 | 97,407  | 16.2 | 1,221,803 | 2.0     |
| MSMB-3   | 670,037 | 6,390,696  | 11,781,755 | 594,914      | 88.8 | 5,944,966    | 93.0 | 10,973,851   | 93.1 | 96,308  | 16.2 | 1,208,546 | 2.0     |
| MYCs1-1  | 553,764 | 6,429,193  | 6,814,583  | 113,598      | 20.5 | 1,731,164    | 26.9 | 1,545,201    | 22.7 | 2,878   | 2.5  | 268,226   | 2.4     |

|              |         |            |            |         |      |            |      |            |      |         |      |           |     |
|--------------|---------|------------|------------|---------|------|------------|------|------------|------|---------|------|-----------|-----|
| MYCs1-2      | 687,851 | 8,899,471  | 6,461,177  | 140,778 | 20.5 | 2,369,217  | 26.6 | 1,463,349  | 22.6 | 3,683   | 2.6  | 331,779   | 2.4 |
| MYCs1-3      | 657,970 | 8,930,292  | 26,961,629 | 113,323 | 17.2 | 2,363,234  | 26.5 | 6,025,793  | 22.3 | 2,933   | 2.6  | 266,889   | 2.4 |
| MYCs2-1      | 242,405 | 10,383,834 | 25,278,391 | 47,311  | 19.5 | 9,761,909  | 94.0 | 23,938,321 | 94.7 | 7,589   | 16.0 | 94,555    | 2.0 |
| MYCs2-2      | 238,102 | 10,450,639 | 24,253,590 | 47,256  | 19.8 | 9,828,501  | 94.0 | 22,978,218 | 94.7 | 7,569   | 16.0 | 94,471    | 2.0 |
| MYCs2-3      | 230,792 | 10,097,657 | 22,738,159 | 47,230  | 20.5 | 9,500,218  | 94.1 | 21,544,683 | 94.8 | 7,565   | 16.0 | 94,496    | 2.0 |
| PKLR-24h-1   | 173,084 | 60,070,760 | 2,163,171  | 46,646  | 26.9 | 58,491,803 | 97.4 | 1,955,698  | 90.4 | 11,769  | 25.2 | 71,122    | 1.5 |
| PKLR-24h-2   | 138,614 | 60,223,777 | 1,429,279  | 45,523  | 32.8 | 58,768,966 | 97.6 | 1,288,776  | 90.2 | 11,463  | 25.2 | 69,411    | 1.5 |
| PKLR-24h-3   | 149,197 | 63,764,262 | 1,519,080  | 44,389  | 29.8 | 62,203,474 | 97.6 | 1,359,753  | 89.5 | 11,326  | 25.5 | 67,361    | 1.5 |
| PKLR-48h-1   | 136,270 | 7,455,307  | 4,969,789  | 49,614  | 36.4 | 7,208,398  | 96.7 | 4,723,095  | 95.0 | 12,465  | 25.1 | 75,773    | 1.5 |
| PKLR-48h-2   | 154,324 | 8,986,733  | 6,822,420  | 50,683  | 32.8 | 8,680,506  | 96.6 | 6,504,490  | 95.3 | 12,624  | 24.9 | 77,809    | 1.5 |
| PKLR-48h-3   | 191,654 | 8,862,707  | 7,912,466  | 53,256  | 27.8 | 8,510,594  | 96.0 | 7,457,785  | 94.3 | 13,132  | 24.7 | 82,482    | 1.5 |
| RET-1        | 212,407 | 6,490,718  | 5,332,490  | 162,442 | 76.5 | 5,777,363  | 89.0 | 4,740,932  | 88.9 | 46,024  | 28.3 | 247,543   | 1.5 |
| RET-2        | 209,619 | 5,497,713  | 9,949,970  | 163,221 | 77.9 | 4,891,505  | 89.0 | 8,864,017  | 89.1 | 46,268  | 28.3 | 248,715   | 1.5 |
| RET-3        | 228,711 | 7,153,233  | 9,256,893  | 163,304 | 71.4 | 6,351,594  | 88.8 | 8,224,281  | 88.8 | 46,292  | 28.3 | 248,789   | 1.5 |
| SORT1.2-1    | 361,601 | 18,633,183 | 6,148,782  | 103,019 | 28.5 | 14,099,010 | 75.7 | 4,443,731  | 72.3 | 17,317  | 16.8 | 204,598   | 2.0 |
| SORT1.2-2    | 377,463 | 15,970,828 | 7,364,456  | 103,869 | 27.5 | 12,028,676 | 75.3 | 5,314,027  | 72.2 | 17,426  | 16.8 | 206,638   | 2.0 |
| SORT1.2-3    | 268,226 | 10,332,218 | 5,286,779  | 102,015 | 38.0 | 7,838,126  | 75.9 | 3,903,519  | 73.8 | 17,227  | 16.9 | 202,268   | 2.0 |
| SORT1-1      | 746,577 | 16,673,908 | 31,367,939 | 39,578  | 5.3  | 14,474,306 | 86.8 | 24,750,248 | 78.9 | 5,307   | 13.4 | 88,124    | 2.2 |
| SORT1-2      | 723,742 | 18,962,383 | 19,747,191 | 39,511  | 5.5  | 16,517,700 | 87.1 | 15,807,222 | 80.0 | 5,300   | 13.4 | 87,955    | 2.2 |
| SORT1-3      | 748,314 | 20,320,267 | 17,953,683 | 39,516  | 5.3  | 17,683,609 | 87.0 | 14,046,965 | 78.2 | 5,309   | 13.4 | 87,964    | 2.2 |
| SORT1-flip-1 | 331,589 | 12,166,621 | 29,066,644 | 140,787 | 42.5 | 9,953,413  | 81.8 | 24,014,577 | 82.6 | 31,099  | 22.1 | 235,726   | 1.7 |
| SORT1-flip-2 | 313,075 | 11,542,062 | 25,124,427 | 140,650 | 44.9 | 9,455,478  | 81.9 | 20,763,311 | 82.6 | 31,109  | 22.1 | 235,379   | 1.7 |
| SORT1-flip-3 | 317,684 | 11,916,102 | 25,362,908 | 140,795 | 44.3 | 9,759,092  | 81.9 | 20,955,947 | 82.6 | 31,113  | 22.1 | 235,724   | 1.7 |
| TCF7L2-1     | 374,223 | 15,108,800 | 23,655,355 | 100,157 | 26.8 | 14,202,439 | 94.0 | 22,260,177 | 94.1 | 18,273  | 18.2 | 185,613   | 1.9 |
| TCF7L2-2     | 417,767 | 14,956,164 | 32,468,628 | 100,350 | 24.0 | 14,006,822 | 93.7 | 30,546,904 | 94.1 | 18,328  | 18.3 | 185,912   | 1.9 |
| TCF7L2-3     | 368,615 | 14,520,864 | 23,374,207 | 100,134 | 27.2 | 13,646,053 | 94.0 | 21,988,603 | 94.1 | 18,278  | 18.3 | 185,497   | 1.9 |
| TERT-HEK-1   | 335,270 | 11,248,490 | 11,378,602 | 58,565  | 17.5 | 7,294,186  | 64.8 | 7,127,589  | 62.6 | 13,188  | 22.5 | 94,368    | 1.6 |
| TERT-HEK-2   | 171,124 | 2,560,571  | 3,994,303  | 54,373  | 31.8 | 1,678,719  | 65.6 | 2,574,708  | 64.5 | 12,301  | 22.6 | 87,278    | 1.6 |
| TERT-HEK-3   | 183,808 | 3,252,096  | 3,789,458  | 55,035  | 29.9 | 2,132,221  | 65.6 | 2,403,315  | 63.4 | 12,438  | 22.6 | 88,395    | 1.6 |
| TERT-GBM-1   | 355,220 | 13,418,248 | 19,211,451 | 58,007  | 16.3 | 8,720,079  | 65.0 | 12,333,250 | 64.2 | 13,065  | 22.5 | 93,285    | 1.6 |
| TERT-GBM-2   | 267,946 | 11,585,462 | 8,259,377  | 56,500  | 21.1 | 7,598,877  | 65.6 | 5,308,817  | 64.3 | 12,796  | 22.6 | 90,455    | 1.6 |
| TERT-GBM-3   | 321,270 | 10,799,638 | 15,808,970 | 57,477  | 17.9 | 7,012,582  | 64.9 | 10,147,049 | 64.2 | 12,968  | 22.6 | 92,378    | 1.6 |
| TERT-GAa-1   | 330,418 | 13,997,031 | 12,720,466 | 54,526  | 16.5 | 9,157,350  | 65.4 | 8,074,884  | 63.5 | 12,293  | 22.5 | 87,683    | 1.6 |
| TERT-GAa-2   | 273,034 | 13,438,634 | 7,480,710  | 52,841  | 19.4 | 8,872,520  | 66.0 | 4,759,939  | 63.6 | 11,896  | 22.5 | 84,944    | 1.6 |
| TERT-GAa-3   | 330,409 | 13,973,219 | 11,210,584 | 54,503  | 16.5 | 9,142,186  | 65.4 | 7,061,935  | 63.0 | 12,263  | 22.5 | 87,683    | 1.6 |
| TERT-GSc-1   | 274,950 | 15,911,173 | 6,513,278  | 54,440  | 19.8 | 10,480,550 | 65.9 | 4,149,292  | 63.7 | 12,280  | 22.6 | 87,358    | 1.6 |
| TERT-GSc-2   | 313,078 | 15,921,742 | 9,269,517  | 55,079  | 17.6 | 10,438,703 | 65.6 | 5,878,186  | 63.4 | 12,447  | 22.6 | 88,329    | 1.6 |
| TERT-GSc-3   | 319,046 | 16,567,050 | 9,177,995  | 54,956  | 17.2 | 10,870,900 | 65.6 | 5,814,748  | 63.4 | 12,434  | 22.6 | 88,139    | 1.6 |
| UC88-1       | 189,033 | 10,320,132 | 12,162,659 | 58,087  | 30.7 | 8,982,208  | 87.0 | 10,610,535 | 87.2 | 6,939   | 11.9 | 135,643   | 2.3 |
| UC88-2       | 282,779 | 13,218,404 | 25,762,258 | 58,905  | 20.8 | 11,430,470 | 86.5 | 22,389,889 | 86.9 | 7,019   | 11.9 | 137,570   | 2.3 |
| UC88-3       | 130,950 | 6,816,894  | 6,412,974  | 57,784  | 44.1 | 5,958,971  | 87.4 | 5,621,456  | 87.7 | 6,883   | 11.9 | 134,912   | 2.3 |
| ZFAND3-1     | 762,485 | 13,009,004 | 9,895,152  | 146,235 | 19.2 | 5,678,835  | 43.7 | 4,176,057  | 42.2 | 10,071  | 6.9  | 427,345   | 2.9 |
| ZFAND3-2     | 730,676 | 15,242,143 | 8,146,864  | 144,184 | 19.7 | 6,739,354  | 44.2 | 3,433,906  | 42.2 | 9,927   | 6.9  | 421,275   | 2.9 |
| ZFAND3-3     | 739,848 | 15,163,717 | 7,536,228  | 145,076 | 19.6 | 6,669,983  | 44.0 | 3,179,378  | 42.2 | 9,994   | 6.9  | 423,932   | 2.9 |
| ZRS-h13-1    | 753,735 | 5,879,814  | 15,487,602 | 614,082 | 81.5 | 5,123,141  | 87.1 | 13,538,056 | 87.4 | 106,980 | 17.4 | 1,247,544 | 2.0 |

|             |         |           |            |         |      |           |      |            |      |         |      |           |     |
|-------------|---------|-----------|------------|---------|------|-----------|------|------------|------|---------|------|-----------|-----|
| ZRS-h13-2   | 697,780 | 5,652,278 | 5,038,577  | 581,126 | 83.3 | 4,948,648 | 87.6 | 4,404,719  | 87.4 | 101,040 | 17.4 | 1,181,566 | 2.0 |
| ZRS-h13-3   | 764,586 | 6,731,343 | 15,815,800 | 620,257 | 81.1 | 5,866,656 | 87.2 | 13,817,121 | 87.4 | 108,107 | 17.4 | 1,259,238 | 2.0 |
| ZRS-h13h2-1 | 714,593 | 4,064,366 | 13,354,202 | 590,306 | 82.6 | 3,544,054 | 87.2 | 11,695,065 | 87.6 | 102,860 | 17.4 | 1,199,781 | 2.0 |
| ZRS-h13h2-2 | 719,151 | 4,510,062 | 11,064,121 | 594,407 | 82.7 | 3,935,117 | 87.3 | 9,680,563  | 87.5 | 103,505 | 17.4 | 1,208,072 | 2.0 |
| ZRS-h13h2-3 | 736,156 | 4,822,109 | 15,527,744 | 604,186 | 82.1 | 4,203,127 | 87.2 | 13,583,482 | 87.5 | 105,191 | 17.4 | 1,228,001 | 2.0 |



### **Supplementary Table 5**

**Correlation of SORT1 and LDLR with different minimum required tags.** Pearson and Spearman correlation coefficients between LDLR and SORT1 replicate experiments requiring different minimum number of tags readouts per substitution or 1 bp deletion variant included.

| <b>LDLR</b>   | <b>Pearson</b> | <b>Spearman</b> | <b>SORT1</b>  | <b>Pearson</b> | <b>Spearman</b> |
|---------------|----------------|-----------------|---------------|----------------|-----------------|
| <i>All</i>    | 0.93292        | 0.81082         | <i>All</i>    | 0.93912        | 0.83928         |
| <i>Min 10</i> | 0.97144        | 0.86273         | <i>Min 10</i> | 0.96099        | 0.86436         |
| <i>Min 20</i> | 0.97484        | 0.86045         | <i>Min 20</i> | 0.96796        | 0.87945         |
| <i>Min 30</i> | 0.97664        | 0.86358         | <i>Min 30</i> | 0.97311        | 0.89615         |
| <i>Min 40</i> | 0.97827        | 0.87610         | <i>Min 40</i> | 0.97626        | 0.90280         |
| <i>Min 50</i> | 0.98004        | 0.87905         | <i>Min 50</i> | 0.97793        | 0.90508         |

### Supplementary Table 6

**Variant coverage with different thresholds of required tags.** Single nucleotide coverage and 1 bp deletion coverage obtained after combining transfection replicates, tabulated for different minimum numbers of tags. MYC (rs11986220) is abbreviated to MYCs1 and MYC (rs6983267) abbreviated to MYCs2. TERT-GBM-SiGABPA and TERT-GBM-SiScramble-2 are abbreviated to TERT-GAa and TERT-GSc, respectively.

| Combined Exp.  | Len. | All  |         |        |        | Min 10 Obs |         |        |        | Min 20 Obs |         |        |        |
|----------------|------|------|---------|--------|--------|------------|---------|--------|--------|------------|---------|--------|--------|
|                |      | SNVs |         | 1bpDel |        | SNVs       |         | 1bpDel |        | SNVs       |         | 1bpDel |        |
| BCL11A         | 600  | 1799 | 99.94%  | 263    | 43.83% | 1798       | 99.89%  | 187    | 31.17% | 1794       | 99.67%  | 167    | 27.83% |
| F9             | 303  | 904  | 99.45%  | 80     | 26.40% | 888        | 97.69%  | 64     | 21.12% | 852        | 93.73%  | 52     | 17.16% |
| FOXE1          | 600  | 1800 | 100.00% | 248    | 41.33% | 1793       | 99.61%  | 130    | 21.67% | 1768       | 98.22%  | 111    | 18.50% |
| GP1BB          | 385  | 1154 | 99.91%  | 114    | 29.61% | 1154       | 99.91%  | 85     | 22.08% | 1154       | 99.91%  | 79     | 20.52% |
| HBB            | 187  | 561  | 100.00% | 62     | 33.16% | 561        | 100.00% | 35     | 18.72% | 561        | 100.00% | 34     | 18.18% |
| HBG1           | 274  | 822  | 100.00% | 85     | 31.02% | 820        | 99.76%  | 68     | 24.82% | 811        | 98.66%  | 61     | 22.26% |
| HNF4A          | 285  | 855  | 100.00% | 122    | 42.81% | 854        | 99.88%  | 77     | 27.02% | 854        | 99.88%  | 69     | 24.21% |
| IRF4           | 451  | 1353 | 100.00% | 157    | 34.81% | 1353       | 100.00% | 105    | 23.28% | 1353       | 100.00% | 91     | 20.18% |
| IRF6           | 601  | 1785 | 99.00%  | 121    | 20.13% | 1676       | 92.96%  | 63     | 10.48% | 1497       | 83.03%  | 41     | 6.82%  |
| LDLR           | 318  | 954  | 100.00% | 129    | 40.57% | 945        | 99.06%  | 59     | 18.55% | 924        | 96.86%  | 49     | 15.41% |
| LDLR.2         | 318  | 954  | 100.00% | 139    | 43.71% | 950        | 99.58%  | 74     | 23.27% | 941        | 98.64%  | 57     | 17.92% |
| MSMB           | 593  | 1779 | 100.00% | 247    | 41.65% | 1778       | 99.94%  | 140    | 23.61% | 1777       | 99.89%  | 124    | 20.91% |
| MYCs1          | 464  | 1392 | 100.00% | 293    | 63.15% | 1375       | 98.78%  | 183    | 39.44% | 1339       | 96.19%  | 159    | 34.27% |
| MYCs2          | 600  | 1792 | 99.56%  | 158    | 26.33% | 1715       | 95.28%  | 94     | 15.67% | 1578       | 87.67%  | 77     | 12.83% |
| PKLR-24h       | 470  | 1407 | 99.79%  | 369    | 78.51% | 1369       | 97.09%  | 134    | 28.51% | 1279       | 90.71%  | 83     | 17.66% |
| PKLR-48h       | 470  | 1407 | 99.79%  | 387    | 82.34% | 1379       | 97.80%  | 154    | 32.77% | 1307       | 92.70%  | 94     | 20.00% |
| RET            | 600  | 1797 | 99.83%  | 165    | 27.50% | 1776       | 98.67%  | 135    | 22.50% | 1752       | 97.33%  | 127    | 21.17% |
| SORT1          | 600  | 1790 | 99.44%  | 137    | 22.83% | 1710       | 95.00%  | 96     | 16.00% | 1572       | 87.33%  | 76     | 12.67% |
| SORT1.2        | 600  | 1798 | 99.89%  | 200    | 33.33% | 1787       | 99.28%  | 131    | 21.83% | 1760       | 97.78%  | 114    | 19.00% |
| SORT1-flip     | 600  | 1791 | 99.50%  | 183    | 30.50% | 1755       | 97.50%  | 129    | 21.50% | 1709       | 94.94%  | 116    | 19.33% |
| TCF7L2         | 600  | 1770 | 98.33%  | 140    | 23.33% | 1700       | 94.44%  | 101    | 16.83% | 1650       | 91.67%  | 87     | 14.50% |
| TERT-GAa       | 259  | 777  | 100.00% | 197    | 76.06% | 769        | 98.97%  | 100    | 38.61% | 747        | 96.14%  | 77     | 29.73% |
| TERT-GBM       | 259  | 777  | 100.00% | 196    | 75.68% | 770        | 99.10%  | 108    | 41.70% | 751        | 96.65%  | 78     | 30.12% |
| TERT-GSc       | 259  | 777  | 100.00% | 197    | 76.06% | 769        | 98.97%  | 97     | 37.45% | 750        | 96.53%  | 76     | 29.34% |
| TERT-HEK       | 259  | 777  | 100.00% | 198    | 76.45% | 770        | 99.10%  | 95     | 36.68% | 753        | 96.91%  | 72     | 27.80% |
| UC88           | 590  | 1761 | 99.49%  | 203    | 34.41% | 1706       | 96.38%  | 134    | 22.71% | 1642       | 92.77%  | 112    | 18.98% |
| ZFAND3         | 579  | 1736 | 99.94%  | 276    | 47.67% | 1735       | 99.88%  | 158    | 27.29% | 1725       | 99.31%  | 140    | 24.18% |
| ZRS-h13        | 485  | 1455 | 100.00% | 206    | 42.47% | 1455       | 100.00% | 116    | 23.92% | 1455       | 100.00% | 106    | 21.86% |
| ZRS-h13h2      | 485  | 1455 | 100.00% | 207    | 42.68% | 1455       | 100.00% | 117    | 24.12% | 1455       | 100.00% | 106    | 21.86% |
| <b>Average</b> |      |      | 99.79%  |        | 44.43% |            | 98.43%  |        | 25.29% |            | 95.97%  |        | 20.87% |
| <b>Minimum</b> |      |      | 98.33%  |        | 20.13% |            | 92.96%  |        | 10.48% |            | 83.03%  |        | 6.82%  |
| <b>Maximum</b> |      |      | 100.00% |        | 82.34% |            | 100.00% |        | 41.70% |            | 100.00% |        | 34.27% |

| Comb. Exp. | Len. | Min 30 Obs |         |        |        | Min 40 Obs |         |        |        | Min 50 Obs |        |        |        |
|------------|------|------------|---------|--------|--------|------------|---------|--------|--------|------------|--------|--------|--------|
|            |      | SNVs       |         | 1bpDel |        | SNVs       |         | 1bpDel |        | SNVs       |        | 1bpDel |        |
| BCL11A     | 600  | 1784       | 99.11%  | 153    | 25.50% | 1772       | 98.44%  | 145    | 24.17% | 1750       | 97.22% | 141    | 23.50% |
| F9         | 303  | 821        | 90.32%  | 43     | 14.19% | 790        | 86.91%  | 41     | 13.53% | 768        | 84.49% | 36     | 11.88% |
| FOXE1      | 600  | 1729       | 96.06%  | 101    | 16.83% | 1685       | 93.61%  | 93     | 15.50% | 1621       | 90.06% | 86     | 14.33% |
| GP1BB      | 385  | 1153       | 99.83%  | 74     | 19.22% | 1152       | 99.74%  | 72     | 18.70% | 1145       | 99.13% | 70     | 18.18% |
| HBB        | 187  | 561        | 100.00% | 33     | 17.65% | 561        | 100.00% | 33     | 17.65% | 559        | 99.64% | 33     | 17.65% |

|                   |     |      |         |     |        |      |         |     |        |      |        |     |        |
|-------------------|-----|------|---------|-----|--------|------|---------|-----|--------|------|--------|-----|--------|
| <i>HBG1</i>       | 274 | 802  | 97.57%  | 55  | 20.07% | 783  | 95.26%  | 47  | 17.15% | 760  | 92.46% | 46  | 16.79% |
| <i>HNF4A</i>      | 285 | 853  | 99.77%  | 69  | 24.21% | 853  | 99.77%  | 67  | 23.51% | 853  | 99.77% | 66  | 23.16% |
| <i>IRF4</i>       | 451 | 1353 | 100.00% | 84  | 18.63% | 1344 | 99.33%  | 81  | 17.96% | 1337 | 98.82% | 80  | 17.74% |
| <i>IRF6</i>       | 601 | 1317 | 73.04%  | 32  | 5.32%  | 1158 | 64.23%  | 23  | 3.83%  | 1054 | 58.46% | 13  | 2.16%  |
| <i>LDLR</i>       | 318 | 892  | 93.50%  | 45  | 14.15% | 843  | 88.36%  | 43  | 13.52% | 787  | 82.49% | 40  | 12.58% |
| <i>LDLR.2</i>     | 318 | 929  | 97.38%  | 50  | 15.72% | 906  | 94.97%  | 47  | 14.78% | 879  | 92.14% | 44  | 13.84% |
| <i>MSMB</i>       | 593 | 1777 | 99.89%  | 117 | 19.73% | 1776 | 99.83%  | 114 | 19.22% | 1774 | 99.72% | 113 | 19.06% |
| <i>MYCs1</i>      | 464 | 1267 | 91.02%  | 142 | 30.60% | 1204 | 86.49%  | 126 | 27.16% | 1132 | 81.32% | 117 | 25.22% |
| <i>MYCs2</i>      | 600 | 1462 | 81.22%  | 67  | 11.17% | 1330 | 73.89%  | 51  | 8.50%  | 1227 | 68.17% | 48  | 8.00%  |
| <i>PKLR-24h</i>   | 470 | 1170 | 82.98%  | 59  | 12.55% | 1082 | 76.74%  | 48  | 10.21% | 1007 | 71.42% | 36  | 7.66%  |
| <i>PKLR-48h</i>   | 470 | 1205 | 85.46%  | 66  | 14.04% | 1126 | 79.86%  | 53  | 11.28% | 1049 | 74.40% | 48  | 10.21% |
| <i>RET</i>        | 600 | 1726 | 95.89%  | 119 | 19.83% | 1665 | 92.50%  | 110 | 18.33% | 1612 | 89.56% | 101 | 16.83% |
| <i>SORT1</i>      | 600 | 1416 | 78.67%  | 66  | 11.00% | 1280 | 71.11%  | 58  | 9.67%  | 1178 | 65.44% | 54  | 9.00%  |
| <i>SORT1.2</i>    | 600 | 1712 | 95.11%  | 103 | 17.17% | 1665 | 92.50%  | 94  | 15.67% | 1617 | 89.83% | 83  | 13.83% |
| <i>SORT1-flip</i> | 600 | 1661 | 92.28%  | 102 | 17.00% | 1593 | 88.50%  | 95  | 15.83% | 1539 | 85.50% | 90  | 15.00% |
| <i>TCF7L2</i>     | 600 | 1605 | 89.17%  | 76  | 12.67% | 1527 | 84.83%  | 64  | 10.67% | 1458 | 81.00% | 58  | 9.67%  |
| <i>TERT-GAa</i>   | 259 | 714  | 91.89%  | 61  | 23.55% | 676  | 87.00%  | 57  | 22.01% | 631  | 81.21% | 50  | 19.31% |
| <i>TERT-GBM</i>   | 259 | 721  | 92.79%  | 63  | 24.32% | 682  | 87.77%  | 59  | 22.78% | 646  | 83.14% | 52  | 20.08% |
| <i>TERT-GSc</i>   | 259 | 716  | 92.15%  | 62  | 23.94% | 675  | 86.87%  | 58  | 22.39% | 636  | 81.85% | 48  | 18.53% |
| <i>TERT-HEK</i>   | 259 | 718  | 92.41%  | 62  | 23.94% | 682  | 87.77%  | 56  | 21.62% | 639  | 82.24% | 49  | 18.92% |
| <i>UC88</i>       | 590 | 1562 | 88.25%  | 98  | 16.61% | 1453 | 82.09%  | 82  | 13.90% | 1357 | 76.67% | 75  | 12.71% |
| <i>ZFAND3</i>     | 579 | 1715 | 98.73%  | 129 | 22.28% | 1689 | 97.24%  | 117 | 20.21% | 1664 | 95.80% | 101 | 17.44% |
| <i>ZRS-h13</i>    | 485 | 1454 | 99.93%  | 100 | 20.62% | 1452 | 99.79%  | 97  | 20.00% | 1451 | 99.73% | 94  | 19.38% |
| <i>ZRS-h13h2</i>  | 485 | 1454 | 99.93%  | 99  | 20.41% | 1453 | 99.86%  | 97  | 20.00% | 1450 | 99.66% | 95  | 19.59% |
| <b>Average</b>    |     |      | 92.91%  |     | 18.38% |      | 89.49%  |     | 16.89% |      | 86.25% |     | 15.59% |
| <b>Minimum</b>    |     |      | 73.04%  |     | 5.32%  |      | 64.23%  |     | 3.83%  |      | 58.46% |     | 2.16%  |
| <b>Maximum</b>    |     |      | 100.00% |     | 30.60% |      | 100.00% |     | 27.16% |      | 99.77% |     | 25.22% |

### Supplementary Table 7

**Pearson correlation across different transfection replicates.** Correlation from the three transfection replicates of fitted SNV and 1 bp deletion variant effects divided by their standard deviation (requiring at least 10 tags in each replicate). MYC (rs11986220) is abbreviated to MYCs1 and MYC (rs6983267) abbreviated to MYCs2. TERT-HEK293T, TER-GBM, TERT-GBM-SiGABPA and TERT-GBM-SiScramble-2 are abbreviated to TERT-H, TERT-G, TERT-GAa and TERT-GSc, respectively. The left side considers all estimates obtained, the right side tries to exclude nonsignificant allele effects by requiring a lenient p-value threshold (<0.01) in at least one of the replicates. We use the reduction in included alleles as a proxy for the proportion of alleles with regulatory activity for each element (Frac.). We note that this estimate is confounded by other factors of experimental reproducibility, as can be seen from the variance observed for elements with multiple experiments (LDLR, PKLR, SORT1, TERT).

| Name       | Min. 10 tags |             |             |      | Min. 10 tags, excl. non-significant effects |            |            |      |       |
|------------|--------------|-------------|-------------|------|---------------------------------------------|------------|------------|------|-------|
|            | Rep 1 v. 2   | Rep 1 v. 3  | Rep 2 v. 3  | Mean | Rep 1 v. 2                                  | Rep 1 v. 3 | Rep 2 v. 3 | Mean | Frac. |
| BCL11A     | 0.38 (1937)  | 0.42 (1938) | 0.35 (1938) | 0.38 | 0.70 (107)                                  | 0.69 (108) | 0.66 (95)  | 0.68 | 5%    |
| F9         | 0.88 (863)   | 0.87 (861)  | 0.90 (865)  | 0.88 | 0.95 (196)                                  | 0.95 (215) | 0.96 (210) | 0.95 | 21%   |
| FOXE1      | 0.17 (1827)  | 0.12 (1823) | 0.18 (1827) | 0.16 | 0.46 (65)                                   | 0.23 (63)  | 0.38 (52)  | 0.36 | 3%    |
| GP1BB      | 0.88 (1226)  | 0.89 (1225) | 0.88 (1227) | 0.88 | 0.94 (268)                                  | 0.95 (249) | 0.94 (276) | 0.94 | 21%   |
| HBB        | 0.78 (594)   | 0.75 (594)  | 0.77 (594)  | 0.77 | 0.89 (119)                                  | 0.89 (115) | 0.89 (119) | 0.89 | 19%   |
| HBG1       | 0.92 (856)   | 0.92 (856)  | 0.91 (858)  | 0.92 | 0.96 (239)                                  | 0.95 (244) | 0.94 (246) | 0.95 | 27%   |
| HNFB4A     | 0.88 (922)   | 0.89 (922)  | 0.88 (922)  | 0.89 | 0.95 (192)                                  | 0.96 (182) | 0.96 (171) | 0.96 | 19%   |
| IRF4       | 0.99 (1437)  | 0.99 (1438) | 0.99 (1437) | 0.99 | 0.99 (789)                                  | 0.99 (793) | 0.99 (777) | 0.99 | 52%   |
| IRF6       | 0.96 (1347)  | 0.97 (1351) | 0.96 (1347) | 0.96 | 0.98 (340)                                  | 0.98 (390) | 0.98 (371) | 0.98 | 19%   |
| LDLR       | 0.97 (930)   | 0.97 (928)  | 0.98 (936)  | 0.98 | 0.98 (354)                                  | 0.98 (352) | 0.99 (369) | 0.98 | 34%   |
| LDLR.2     | 0.99 (979)   | 0.99 (979)  | 0.99 (979)  | 0.99 | 1.00 (455)                                  | 1.00 (454) | 1.00 (448) | 1.00 | 42%   |
| MSMB       | 0.89 (1893)  | 0.88 (1894) | 0.88 (1893) | 0.88 | 0.96 (477)                                  | 0.95 (466) | 0.95 (469) | 0.95 | 23%   |
| MYCs1      | 0.33 (1385)  | 0.26 (1355) | 0.35 (1376) | 0.31 | 0.58 (83)                                   | 0.61 (64)  | 0.69 (77)  | 0.63 | 5%    |
| MYCs2      | 0.75 (1529)  | 0.76 (1529) | 0.76 (1529) | 0.75 | 0.92 (136)                                  | 0.93 (133) | 0.93 (138) | 0.93 | 7%    |
| PKLR 24h   | 0.87 (1220)  | 0.85 (1208) | 0.86 (1209) | 0.86 | 0.94 (328)                                  | 0.93 (326) | 0.93 (322) | 0.93 | 20%   |
| PKLR 48h   | 0.91 (1246)  | 0.91 (1255) | 0.92 (1267) | 0.91 | 0.95 (366)                                  | 0.95 (383) | 0.96 (386) | 0.95 | 22%   |
| RET        | 0.70 (1845)  | 0.68 (1845) | 0.75 (1845) | 0.71 | 0.87 (306)                                  | 0.85 (308) | 0.89 (325) | 0.87 | 16%   |
| SORT1      | 0.99 (1483)  | 0.99 (1482) | 0.99 (1483) | 0.99 | 1.00 (753)                                  | 1.00 (756) | 1.00 (756) | 1.00 | 39%   |
| SORT1.2    | 0.98 (1815)  | 0.97 (1812) | 0.98 (1815) | 0.98 | 0.99 (793)                                  | 0.98 (773) | 0.98 (790) | 0.99 | 39%   |
| SORT1-flip | 0.99 (1763)  | 0.99 (1763) | 0.99 (1763) | 0.99 | 1.00 (780)                                  | 0.99 (754) | 0.99 (778) | 0.99 | 39%   |
| TCF7L2     | 0.75 (1680)  | 0.77 (1681) | 0.75 (1682) | 0.76 | 0.91 (221)                                  | 0.92 (230) | 0.91 (215) | 0.91 | 12%   |
| TERT-G     | 0.97 (778)   | 0.97 (785)  | 0.96 (780)  | 0.97 | 0.98 (341)                                  | 0.98 (343) | 0.98 (341) | 0.98 | 35%   |
| TERT-GAa   | 0.91 (769)   | 0.93 (779)  | 0.91 (771)  | 0.92 | 0.96 (239)                                  | 0.96 (247) | 0.96 (244) | 0.96 | 25%   |
| TERT-GSc   | 0.95 (778)   | 0.95 (777)  | 0.95 (780)  | 0.95 | 0.97 (281)                                  | 0.97 (279) | 0.97 (273) | 0.97 | 29%   |
| TERT-H     | 0.87 (777)   | 0.87 (781)  | 0.81 (775)  | 0.85 | 0.93 (216)                                  | 0.93 (228) | 0.92 (164) | 0.93 | 21%   |
| UC88       | 0.67 (1660)  | 0.59 (1659) | 0.66 (1661) | 0.64 | 0.91 (140)                                  | 0.88 (113) | 0.92 (134) | 0.90 | 7%    |
| ZFAND3     | 0.89 (1842)  | 0.90 (1841) | 0.89 (1841) | 0.89 | 0.96 (429)                                  | 0.96 (474) | 0.96 (440) | 0.96 | 22%   |
| ZRSh13     | 0.73 (1553)  | 0.80 (1554) | 0.75 (1553) | 0.76 | 0.90 (194)                                  | 0.93 (199) | 0.91 (190) | 0.91 | 12%   |
| ZRSh13h2   | 0.74 (1553)  | 0.77 (1552) | 0.78 (1552) | 0.76 | 0.90 (164)                                  | 0.92 (180) | 0.93 (178) | 0.92 | 11%   |

### Supplementary Table 8

**Number of mutations (Mut.) and sites studied for a representative experiment of each element.** The number of mutations with a significant p-value ( $< 10^{-5}$ ) is reported from the model combining transfection replicates. Counts are provided for reporter expression increasing ( $\uparrow$ ) and decreasing ( $\downarrow$ ) mutations. The overlap with single nucleotide variants present in the gnomAD r2.1 database is reported including singleton variants (gnAD columns) and excluding singleton variants (no sgl columns). Of the 31,243 mutations, 28,937 are single nucleotide variants. MYC (rs11986220) is abbreviated to MYCs1 and MYC (rs6983267) abbreviated to MYCs2.

| Experiment        | Mut.         | Sites       | Sig. ( $10^{-5}$ ) | $\uparrow$  | $\downarrow$ | 2-fold     | $\uparrow$ | $\downarrow$ | gnAD       | Sig. ( $10^{-5}$ ) | $\uparrow$ | $\downarrow$ | gnAD (no sgl) | Sig. ( $10^{-5}$ ) | $\uparrow$ | $\downarrow$ |
|-------------------|--------------|-------------|--------------------|-------------|--------------|------------|------------|--------------|------------|--------------------|------------|--------------|---------------|--------------------|------------|--------------|
| <i>BCL11A</i>     | 1985         | 600         | 66                 | 35          | 31           | 2          | 0          | 2            | 47         | 3                  | 2          | 1            | 14            | 0                  | 0          | 0            |
| <i>F9</i>         | 952          | 303         | 142                | 76          | 66           | 2          | 1          | 1            | 11         | 2                  | 1          | 1            | 4             | 0                  | 0          | 0            |
| <i>FOXE1</i>      | 1923         | 600         | 6                  | 3           | 3            | 0          | 0          | 0            | 38         | 0                  | 0          | 0            | 20            | 0                  | 0          | 0            |
| <i>GP1BB</i>      | 1239         | 385         | 184                | 33          | 151          | 11         | 0          | 11           | 43         | 5                  | 3          | 2            | 11            | 2                  | 1          | 1            |
| <i>HBB</i>        | 596          | 187         | 90                 | 33          | 57           | 1          | 1          | 0            | 18         | 7                  | 0          | 7            | 8             | 4                  | 0          | 4            |
| <i>HBG1</i>       | 888          | 274         | 181                | 24          | 157          | 26         | 0          | 26           | 13         | 3                  | 0          | 3            | 5             | 2                  | 0          | 2            |
| <i>HNF4a</i>      | 931          | 285         | 119                | 63          | 56           | 1          | 1          | 0            | 22         | 3                  | 1          | 2            | 11            | 1                  | 0          | 1            |
| <i>IRF4</i>       | 1458         | 451         | 678                | 267         | 411          | 135        | 9          | 126          | 39         | 20                 | 7          | 13           | 20            | 9                  | 4          | 5            |
| <i>IRF6</i>       | 1739         | 599         | 306                | 112         | 194          | 51         | 13         | 38           | 38         | 8                  | 0          | 8            | 18            | 5                  | 0          | 5            |
| <i>LDLR.2</i>     | 1024         | 318         | 411                | 103         | 308          | 136        | 9          | 127          | 17         | 5                  | 2          | 3            | 5             | 1                  | 1          | 0            |
| <i>MSMB</i>       | 1912         | 591         | 369                | 177         | 192          | 1          | 0          | 1            | 34         | 12                 | 8          | 4            | 17            | 6                  | 6          | 0            |
| <i>MYCs1</i>      | 1554         | 463         | 11                 | 11          | 0            | 0          | 0          | 0            | 20         | 0                  | 0          | 0            | 10            | 0                  | 0          | 0            |
| <i>MYCs2</i>      | 1809         | 600         | 85                 | 47          | 38           | 0          | 0          | 0            | 41         | 2                  | 1          | 1            | 13            | 2                  | 1          | 1            |
| <i>PKLR (48h)</i> | 1533         | 470         | 277                | 88          | 189          | 78         | 10         | 68           | 28         | 9                  | 4          | 5            | 13            | 3                  | 3          | 0            |
| <i>RET</i>        | 1911         | 600         | 165                | 67          | 98           | 0          | 0          | 0            | 57         | 9                  | 4          | 5            | 25            | 6                  | 4          | 2            |
| <i>SORT1.1</i>    | 1806         | 600         | 789                | 267         | 522          | 143        | 29         | 114          | 54         | 26                 | 7          | 19           | 26            | 10                 | 2          | 8            |
| <i>TCF7L2</i>     | 1801         | 595         | 130                | 43          | 87           | 2          | 2          | 0            | 42         | 3                  | 3          | 0            | 19            | 1                  | 1          | 0            |
| <i>TERT (GBM)</i> | 878          | 259         | 293                | 99          | 194          | 48         | 6          | 42           | 24         | 13                 | 6          | 7            | 10            | 4                  | 3          | 1            |
| <i>UC88</i>       | 1840         | 590         | 69                 | 41          | 28           | 2          | 2          | 0            | 39         | 2                  | 2          | 0            | 11            | 0                  | 0          | 0            |
| <i>ZFAND3</i>     | 1893         | 579         | 328                | 104         | 224          | 3          | 0          | 3            | 40         | 12                 | 2          | 10           | 22            | 6                  | 1          | 5            |
| <i>ZRS (+h13)</i> | 1571         | 485         | 131                | 96          | 35           | 0          | 0          | 0            | 24         | 0                  | 0          | 0            | 12            | 0                  | 0          | 0            |
| <b>Sum</b>        | <b>31243</b> | <b>9834</b> | <b>4830</b>        | <b>1789</b> | <b>3041</b>  | <b>642</b> | <b>83</b>  | <b>559</b>   | <b>689</b> | <b>144</b>         | <b>53</b>  | <b>91</b>    | <b>294</b>    | <b>62</b>          | <b>27</b>  | <b>35</b>    |

**Supplementary Table 9**

**Effects of specific substitution or transition (ts) vs. transversion (tv) effects for significant readouts across a representative experiment of each element.** The number of mutations with a significant p-value ( $< 10^{-5}$ ) is reported from models combining transfection replicates. The overlap with single nucleotide variants present in the gnomAD r2.1 is reported. Elements from Supplementary Table 8 were used.

| Subst        | Type        | All          | Sig.        | Sig.20%     | Sig.2-fold | Var.        | Var.Sig.   | Var.Sig.20% | Var.Sig.2-fold |
|--------------|-------------|--------------|-------------|-------------|------------|-------------|------------|-------------|----------------|
| A>-          | Del         | 571          | 54          | 35          | 13         | n.a.        |            |             |                |
| A>C          | Tv          | 2291         | 208         | 177         | 43         | 18          | 1          | 1           | 4              |
| A>G          | Ts          | 2371         | 534         | 223         | 42         | 70          | 21         | 10          | 0              |
| A>T          | Tv          | 2372         | 374         | 194         | 47         | 10          | 3          | 1           | 1              |
| C>-          | Del         | 635          | 69          | 44          | 12         | n.a.        |            |             |                |
| C>A          | Tv          | 2673         | 372         | 281         | 68         | 47          | 10         | 6           | 1              |
| C>G          | Tv          | 2584         | 283         | 236         | 73         | 48          | 4          | 4           | 0              |
| C>T          | Ts          | 2704         | 575         | 287         | 60         | 159         | 46         | 20          | 2              |
| G>-          | Del         | 576          | 61          | 46          | 7          | n.a.        |            |             |                |
| G>A          | Ts          | 2456         | 488         | 226         | 33         | 150         | 32         | 15          | 2              |
| G>C          | Tv          | 2334         | 201         | 180         | 44         | 54          | 3          | 3           | 1              |
| G>T          | Tv          | 2443         | 320         | 235         | 46         | 39          | 6          | 5           | 1              |
| T>-          | Del         | 524          | 45          | 31          | 8          | n.a.        |            |             |                |
| T>A          | Tv          | 2289         | 422         | 248         | 47         | 9           | 2          | 1           | 0              |
| T>C          | Ts          | 2293         | 593         | 265         | 48         | 66          | 15         | 9           | 1              |
| T>G          | Tv          | 2127         | 231         | 204         | 51         | 19          | 1          | 0           | 0              |
| <b>Total</b> | <b>Dels</b> | <b>2306</b>  | <b>229</b>  | <b>156</b>  | <b>40</b>  | <b>n.a.</b> |            |             |                |
| <b>Total</b> | <b>SNVs</b> | <b>28937</b> | <b>4601</b> | <b>2756</b> | <b>602</b> | <b>689</b>  | <b>144</b> | <b>75</b>   | <b>13</b>      |
| <b>Total</b> | <b>Tv</b>   | <b>19113</b> | <b>2411</b> | <b>1755</b> | <b>419</b> | <b>244</b>  | <b>30</b>  | <b>21</b>   | <b>8</b>       |
| <b>Total</b> | <b>Ts</b>   | <b>9824</b>  | <b>2190</b> | <b>1001</b> | <b>183</b> | <b>445</b>  | <b>114</b> | <b>54</b>   | <b>5</b>       |

### Supplementary Table 10

**Previously described variants of promoters.** Clinical variants of promoters (HBB, HBG1, PKLR, F9, GP1BB, TERT, HNF4A, MSMB, and FOXE1) measured in this MPRA study, as well as additional described variants in Supplementary Note 1. Corresponding RefSeq transcripts of the HGVS annotation are listed in Supplementary Table 1. Fold changes are reported as "non significant" (n.s), if the associated p-value is higher than  $10^{-5}$ . Variants that were not available from our experiments are marked as "not covered" (n.c.). We are including effects for the PKLR\_24h and PKLR\_48h (PKLR\_24h/PKLR\_48h) as well as TERT-GBM and TERT-HEK experiments (TERT-GBM/TERT-HEK). Previous reported phenotypes in literature are summarized in the Phenotype column.

| Coordinates [GRCh37, GRCh38] | Variants                      | Expression effect [log <sub>2</sub> ] | Promoter activity (ratio of WT) | Phenotype                 |
|------------------------------|-------------------------------|---------------------------------------|---------------------------------|---------------------------|
| X:138612869<br>X:139530710   | F9:c.-55G>C                   | n.s.                                  | (0.84)                          | Hemophilia B Leyden       |
| X:138612874<br>X:139530715   | F9:c.-50T>G                   | n.s.                                  | (0.94)                          | Hemophilia B Leyden       |
| X:138612875<br>X:139530716   | F9:c.-49T>A                   | -0.14                                 | 0.91                            | Hemophilia B Leyden       |
| X:138612889<br>X:139530730   | F9:c.-35G>A                   | n.s.                                  | (0.8)                           | Hemophilia B Leyden       |
| X:138612889<br>X:139530730   | F9:c.-35G>C                   | n.c.                                  | n.c                             | Hemophilia B Leyden       |
| X:138612890<br>X:139530731   | F9:c.-34A>T                   | n.s.                                  | (1.00)                          | Hemophilia B Leyden       |
| X:138612902<br>X:139530743   | F9:c.-22T>C                   | -0.15                                 | 0.9                             | Hemophilia B Leyden       |
| X:138612907<br>X:139530748   | F9:c.-17A>G                   | n.s.                                  | (0.91)                          | Hemophilia B Leyden       |
| X:138612907<br>X:139530748   | F9:c.-17A>C                   | n.s.                                  | (0.89)                          | Hemophilia B Leyden       |
| 9:100615914<br>9:97853632    | FOXE1:c.-283G>A,<br>rs1867277 | n.s.                                  | 0.94                            | thyroid cancer-associated |
| 22:19710933<br>22:19723410   | GP1BB:c.-160C>G               | -0.93                                 | 0.52                            | Bernard-Soulier Syndrome  |
| 11:5248402<br>11:5227172     | HBB:c.-151C>T                 | -0.28                                 | 0.82                            | beta+ thal                |
| 11:5248394<br>11:5227164     | HBB:c.-143C>G                 | n.s.                                  | (0.90)                          | beta+ thal                |
| 11:5248393<br>11:5227163     | HBB:c.-142C>T                 | -0.23                                 | 0.85                            | beta+ thal                |
| 11:5248391<br>11:5227161     | HBB:c.-140C>T                 | -0.31                                 | 0.81                            | beta+ thal                |

|                          |               |       |        |                                  |
|--------------------------|---------------|-------|--------|----------------------------------|
| 11:5248389<br>11:5227159 | HBB:c.-138C>A | n.s.  | (0.86) | beta+ thal                       |
| 11:5248389<br>11:5227159 | HBB:c.-138C>T | -0.29 | 0.82   | beta+ thal                       |
| 11:5248389<br>11:5227159 | HBB:c.-138C>G | n.s.  | (0.89) | beta0 thal                       |
| 11:5248388<br>11:5227158 | HBB:c.-137C>A | -0.22 | 0.86   | beta+ thal                       |
| 11:5248388<br>11:5227158 | HBB:c.-137C>G | -0.25 | 0.84   | beta+ thal                       |
| 11:5248388<br>11:5227158 | HBB:c.-137C>T | -0.28 | 0.82   | beta+ thal                       |
| 11:5248387<br>11:5227157 | HBB:c.-136C>A | -0.18 | 0.88   | beta+ thal                       |
| 11:5248387<br>11:5227157 | HBB:c.-136C>G | n.s.  | (0.85) | beta+ thal                       |
| 11:5248378<br>11:5227148 | HBB:c.-127G>C | n.s.  | (0.89) | beta+ thal                       |
| 11:5248373<br>11:5227143 | HBB:c.-122T>A | -0.29 | 0.82   | beta+ thal                       |
| 11:5248372<br>11:5227142 | HBB:c.-121C>T | -0.25 | 0.84   | beta0 thal                       |
| 11:5248351<br>11:5227121 | HBB:c.-100G>A | -0.22 | 0.86   | beta+ thal                       |
| 11:5248350<br>11:5227120 | HBB:c.-99C>G  | 1.19  | 2.28   | no previously reported phenotype |
| 11:5248333<br>11:5227103 | HBB:c.-82C>T  | n.s.  | (0.96) | beta0 thal                       |
| 11:5248333<br>11:5227103 | HBB:c.-82C>A  | n.s.  | (0.97) | beta+ thal                       |
| 11:5248332<br>11:5227102 | HBB:c.-81A>C  | n.s.  | (0.89) | beta+ thal                       |
| 11:5248332<br>11:5227102 | HBB:c.-81A>G  | -0.15 | 0.90   | beta+ thal                       |
| 11:5248331<br>11:5227101 | HBB:c.-80T>C  | -0.23 | 0.85   | beta0 thal                       |
| 11:5248331<br>11:5227101 | HBB:c.-80T>G  | n.s.  | (0.84) | beta0 thal                       |
| 11:5248331<br>11:5227101 | HBB:c.-80T>A  | -0.28 | 0.82   | beta+ thal                       |
| 11:5248330<br>11:5227100 | HBB:c.-79A>G  | -0.38 | 0.77   | beta+ thal                       |
| 11:5248329<br>11:5227099 | HBB:c.-78A>C  | -0.38 | 0.77   | beta+ thal                       |
| 11:5248329<br>11:5227099 | HBB:c.-78A>G  | -0.34 | 0.79   | beta+ thal                       |
| 11:5248327<br>11:5227097 | HBB:c.-76A>C  | n.s.  | (0.88) | beta0 thal                       |
| 11:5248326               | HBB:c.-75G>C  | n.s.  | (0.97) | beta0 thal                       |



|                            |                 |       |        |                           |
|----------------------------|-----------------|-------|--------|---------------------------|
| 11:5227096                 |                 |       |        |                           |
| 11:5248301<br>11:5227071   | HBB:c.-50A>C    | n.s.  | (0.94) | beta+ thal                |
| 11:5248280<br>11:5227050   | HBB:c.-29G>A    | n.s.  | (0.91) | beta+ thal                |
| 11:5248269<br>11:5227039   | HBB:c.-18C>G    | n.s.  | (1.01) | beta+ thal                |
| 11:5271298<br>11:5250068   | HBB1:c.-264C>T  | n.s.  | (0.98) | HPFH                      |
| 11:5271289<br>11:5250059   | HBB1:c.-255C>T  | -0.20 | 0.87   | HPFH                      |
| 11:5271289<br>11:5250059   | HBB1:c.-255C>G  | n.s.  | (1.05) | HPFH                      |
| 11:5271285<br>11:5250055   | HBB1:c.-251T>C  | 0.31  | 1.24   | HPFH                      |
| 11:5271284<br>11:5250054   | HBB1:c.-250C>T  | n.s.  | (0.88) | HPFH                      |
| 11:5271283<br>11:5250053   | HBB1:c.-249C>T  | n.s.  | (0.98) | HPFH                      |
| 11:5271282<br>11:5250052   | HBB1:c.-248C>G  | n.s.  | (0.97) | HPFH                      |
| 11:5271262<br>11:5250032   | HBB1:c.-228T>C  | 0.61  | 1.53   | HPFH                      |
| 11:5271245<br>11:5250015   | HBB1:c.-211C>T  | 0.25  | 1.19   | HPFH                      |
| 11:5271204<br>11:5249974   | HBB1:c.-170G>A  | n.s.  | (1.09) | HPFH                      |
| 11:5271201<br>11:5249971   | HBB1:c.-167C>T  | -0.63 | 0.65   | HPFH                      |
| 11:5271201<br>11:5249971   | HBB1:c.-167C>G  | n.s.  | (1.00) | HPFH                      |
| 11:5271201<br>11:5249971   | HBB1:c.-167C>A  | -0.30 | 0.81   | HPFH                      |
| 11:5271197<br>11:5249967   | HBB1:c.-163A>C  | n.s.  | (1.12) | HPFH                      |
| 20:42984253<br>20:44355613 | HNF4A:c.-192C>G | 0.20  | 1.15   | monogenic B cell diabetes |
| 20:42984264<br>20:44355624 | HNF4A:c.-181G>A | n.s.  | (0.98) | monogenic B cell diabetes |
| 20:42984276<br>20:44355636 | HNF4A:c.-169C>T | n.s.  | (0.99) | monogenic B cell diabetes |
| 20:42984299<br>20:44355659 | HNF4A:c.-146T>C | -0.06 | 0.96   | monogenic B cell diabetes |

|                                                 |                                         |                             |                                   |                                           |
|-------------------------------------------------|-----------------------------------------|-----------------------------|-----------------------------------|-------------------------------------------|
| 20:42984307<br>20:44355667                      | HNF4A:c.-138T>C                         | 1.04                        | 2.06                              | no previous reported phenotype            |
| 20:42984309<br>20:44355669                      | HNF4A:c.-136A>G                         | n.s.                        | (0.02)                            | monogenic B cell diabetes                 |
| 20:42984439<br>20:44355799                      | HNF4A:c.-6T>G                           | 0.96                        | 1.95                              | no previous reported phenotype            |
| 10:51549496<br>10:46046326                      | MSMB:c.-89C>T,<br>rs10993994            | 0.20                        | 1.15                              | prostate cancer-associated                |
| 1:155271510<br>1:155301719                      | PKLR:c.-324T>A                          | n.s./n.s.                   | (1.29)/(1.23)                     | nonfunctional polymorphisms               |
| 1:155271434<br>1:155301643                      | PKLR:c.-248delT                         | n.s./n.s.                   | (1.57)/(0.75)                     | nonfunctional polymorphisms               |
| 1:155271269<br>1:155301478                      | PKLR:c.-83G>C                           | n.s./-2.19                  | (0.42)/0.22                       | PK deficiency                             |
| 1:155271258<br>1:155301467                      | PKLR:c.-72A>G                           | -1.77/-2.40                 | 0.29/0.19                         | PK deficiency                             |
| 5:1295349<br>5:1295234                          | TERT:c.-245T>C,<br>rs2853669            | n.s./n.s.                   | (0.95)/(0.99)                     | melanoma                                  |
| 5:1295250<br>5:1295135                          | TERT:c.-146C>T                          | 2.42/1.42                   | 5.35/2.68                         | glioblastoma                              |
| 5:1295242 -<br>1295243<br>5:1295127-<br>1295128 | TERT:c.[-138C>T;-139C>T],<br>rs35550267 | [0.20;n.s.]/<br>[n.s.;n.s.] | [1.15;(0.99)]/<br>[(1.04);(0.95)] | melanoma                                  |
| 5:1295228-<br>1295229<br>5:1295113-<br>1295112  | TERT:c.[-124C>T;-125C>T]                | [n.s.;2.86]/<br>[n.s.;2.00] | [(0.91);7.26]/<br>[(0.93);4.00]   | bladder carcinoma, melanoma<br>and glioma |
| 5:1295161<br>5:1295046                          | TERT:c.-57A>C                           | 1.14/0.65                   | 2.2/1.57                          | melanoma, bladder cancer                  |
| 5:1295158<br>5:1295043                          | TERT:c.-54C>A                           | 1.65/0.81                   | 3.14/1.75                         | Bladder cancer                            |
| 5:1295149<br>5:1295034                          | TERTc.-45:G>T                           | 1.03/n.s.                   | 2.04/(1.37)                       | Bladder cancer                            |

**Supplementary Table 11**

**Previously described variants of enhancers.** Clinical variants of enhancers (IRF4, IRF6, MYC, RET, TCF7L2, ZFAND3, SORT1, and ZRS) characterized in this MPRA study, as well as some additional described variants in the Supplementary Note 1. Fold changes are reported as "non significant" (n.s.), if the associated p-value is higher than  $10^{-5}$ . Results from multiple experiments are separated by a dash and refer to SORT1/SORT1.2/SORT1-flip and ZRS+HOXD13/ZRS+HOXD13+HAND2, respectively. Phenotypes previously reported in literature are summarized in the Phenotype column.

| <b>Coordinates<br/>[GRCh37,<br/>GRCh38]</b> | <b>Variants</b>                | <b>Expression<br/>effect [<math>\log_2</math>]</b> | <b>Enhancer<br/>activity (ratio<br/>of WT)</b> | <b>Phenotype</b>                                                                               |
|---------------------------------------------|--------------------------------|----------------------------------------------------|------------------------------------------------|------------------------------------------------------------------------------------------------|
| 6:396321<br>6:396321                        | IRF4:C>T, rs12203592           | -1.47                                              | 0.36                                           | pigmentation associated                                                                        |
| 1:209989232<br>1:209815887                  | IRF6:T>C, rs76145088           | -0.28                                              | 0.82                                           | no annotation                                                                                  |
| 1:209989270<br>1:209815925                  | IRF6:C>T, rs642961             | n.s.                                               | (1.06)                                         | isolated cleft lip associated                                                                  |
| 1:209989281<br>1:209815936                  | IRF6:C>T, rs77542756           | n.s.                                               | (1.00)                                         | no annotation                                                                                  |
| 8:128413279<br>8:127401034                  | MYCrs6983267:C>G               | 0.92                                               | 1.86                                           | no previous reported<br>phenotype                                                              |
| 8:128413289<br>8:127401044                  | MYCrs6983267:G>T               | 0.88                                               | 1.84                                           | no previous reported<br>phenotype                                                              |
| 8:128413305<br>8:127401060                  | MYCrs6983267:G>T,<br>rs6983267 | n.s.                                               | (0.95)                                         | cancer related                                                                                 |
| 8:128531689<br>8:127519444                  | MYC:T>A, rs11986220            | n.s.                                               | (0.86)                                         | cancer related                                                                                 |
| 10:43582056<br>10:43086608                  | RET:T>C, rs2435357             | n.s.                                               | (0.99)                                         | Hirschsprung disease                                                                           |
| 1:109817590<br>1:109274968                  | SORT1:G>T, rs12740374          | 2.92/2.74                                          | 7.57/6.68                                      | Associated with plasma low-<br>density lipoprotein<br>cholesterol and myocardial<br>infarctio. |
| 10:114758349<br>10:112998590                | TCF7L2:C>T, rs7903146          | 0.25                                               | 1.19                                           | Diabetes associated                                                                            |
| 10:114758373<br>10:112998614                | TCF7L2:G>C                     | 1.18                                               | 2.27                                           | no previous reported<br>phenotype                                                              |
| 6:37775652<br>6:37807876                    | ZFAND3:C>T, rs58692659         | -0.51                                              | 0.7                                            | Diabetes associated                                                                            |
| 7:156583831<br>7:156791137                  | ZRS:T>C                        | n.s./n.s.                                          | (1.04/1.04)                                    | Preaxial polydactyly & TPT                                                                     |
| 7:156583949<br>7:156791255                  | ZRS:G>C                        | n.s./n.s.                                          | (0.94/0.94)                                    | Preaxial polydactyly & TPT                                                                     |

|                            |         |            |              |                                                                           |
|----------------------------|---------|------------|--------------|---------------------------------------------------------------------------|
| 7:156583951<br>7:156791257 | ZRS:G>A | -0.07/n.s. | 0.95/(0.97)  | Townes Brocks syndrome                                                    |
| 7:156584006<br>7:156791312 | ZRS:A>G | n.s./n.s.  | (0.99/1.00)  | No phenotype                                                              |
| 7:156584015<br>7:156791321 | ZRS:C>T | n.s./ n.s. | (0.99/0.98)  | Polydactyly (mouse)                                                       |
| 7:156584093<br>7:156791399 | ZRS:T>C | n.s./n.s.  | (1.01/0.99)  | Polydactyly (cat)                                                         |
| 7:156584095<br>7:156791401 | ZRS:T>C | n.s. /n.s. | (1.01/1.00 ) | Polydactyly (cat)                                                         |
| 7:156584107<br>7:156791413 | ZRS:A>C | n.s./n.s.  | (1.04/0.99)  | Preaxial polydactyly & TPT                                                |
| 7:156584153<br>7:156791459 | ZRS:T>C | 0.21 /0.12 | 1.16 /1.09   | Polydactyly of the four<br>extremities and bilateral<br>tibial deficiency |
| 7:156584163<br>7:156791469 | ZRS:A>T | n.s./n.s.  | (1.01/0.98)  | Polydactyly (mouse)                                                       |
| 7:156584164<br>7:156791470 | ZRS:T>C | 0.06/n.s.  | 1.04/(1.03)  | Polydactyly (mouse)                                                       |
| 7:156584166<br>7:156791472 | ZRS:C>A | n.s./n.s.  | (0.91/0.9)   | Polydactyly                                                               |
| 7:156584166<br>7:156791472 | ZRS:C>G | n.s./n.s.  | (0.99/0.99)  | Werner mesomelic<br>syndrome                                              |
| 7:156584166<br>7:156791472 | ZRS:C>T | n.s./n.s.  | (0.99/1.01)  | Werner mesomelic<br>syndrome                                              |
| 7:156584168<br>7:156791474 | ZRS:G>A | n.s./-0.06 | (0.99)/0.96  | Werner mesomelic<br>syndrome                                              |
| 7:156584174<br>7:156791480 | ZRS:G>A | n.s. /n.s. | (1.02/1.01)  | Polydactyly & TPT                                                         |
| 7:156584236<br>7:156791542 | ZRS:A>C | n.s./n.s.  | (0.97/0.99)  | Polydactyly                                                               |
| 7:156584241<br>7:156791547 | ZRS:A>G | 0.08/n.s.  | 1.06 /(1.04) | Polydactyly                                                               |
| 7:156584265<br>7:156791571 | ZRS:T>A | n.s./n.s.  | (0.99/0.99)  | Polydactyly                                                               |
| 7:156584273<br>7:156791579 | ZRS:C>T | 0.13/n.s.  | 1.09 /(1.04) | Polydactyly                                                               |
| 7:156584275<br>7:156791581 | ZRS:A>G | n.s./n.s.  | (0.99/1.01)  | TPT                                                                       |
| 7:156584283<br>7:156791589 | ZRS:G>T | n.s./n.s.  | (1.00/1.01)  | Polydactyly & TPT &<br>syndactyly                                         |
| 7:156584285<br>7:156791591 | ZRS:C>A | 0.23/0.17  | 1.17/1.13    | Polydactyly (chicken)                                                     |

### Supplementary Table 12

**Comparison with previously described LDLR mutations showing effect on promoter activity or being implicated in disease.** This table has been modified from Khamis *et al.* 2015<sup>48</sup>. We are reporting log<sub>2</sub> fold changes as well as percentages for our LDLR and LDLR.2 experiments. A reported fold change is considered "no effect" (noEff), if the associated p-Value is higher than 10<sup>-5</sup>. In all other cases, we report a variant as enhancing (Enh) or repressing (Repr), depending on the sign of the log<sub>2</sub> fold change. Familial hypercholesterolemia is abbreviated with FH. FP1 stands for Footprint. SP1 refers to a binding site of the transcription factor SP1. SRE stands for sterol-dependent regulatory element. SREBP1 and SREBP2 are SRE repeat 1 and 2, respectively.

| Coordinates [GRCh37, GRCh38] | Variant in NM_000527.4 [Khamis A et al. 2015] | Location               | Promoter activity (% of WT)                                                | This experiment (Exp 1/2)                | Reference (PMID)                  |
|------------------------------|-----------------------------------------------|------------------------|----------------------------------------------------------------------------|------------------------------------------|-----------------------------------|
| 19:11199957<br>19:11089281   | c.-268G>T                                     | 1 bp from FP1          | In FH and normal (polymorphism)                                            | 0.06 (104%, noEff)<br>-0.07 (95%, noEff) | 10484771                          |
| 19:11200008<br>19:11089332   | c.-217C>T                                     | 2 bp from FP1          | 160% Luciferase                                                            | 1.45 (273%, Enh)<br>1.40 (263%, Enh)     | 10484771                          |
| 19:11200010<br>19:11089334   | c.-215A>G                                     | 4 bp from FP1          | 100% Luciferase<br>[results depending on Serum level]                      | -0.78 (58%, Repr) -<br>0.81 (57%, Repr)  | 22881376                          |
| 19:11200017<br>19:11089341   | c.-208A>T                                     | Between SREBP1 and FP1 | 100% Luciferase                                                            | -1.28 (41%, Repr) -<br>1.06 (47%, Repr)  | 21538688                          |
| 19:11200019<br>19:11089343   | c.-206C>T                                     | Between SREBP1 and FP1 | Not tested                                                                 | -0.84 (55%, Repr) -<br>0.81 (57%, Repr)  | 12052488                          |
| 19:11200037<br>19:11089361   | c.-188C>T                                     | SREBP1                 | Not tested                                                                 | -2.41 (18%, Repr) -<br>2.84 (13%, Repr)  | 16250003                          |
| 19:11200069<br>19:11089393   | c.-156C>T                                     | SREBP2                 | Not tested                                                                 | -2.52 (17%, Repr) -<br>2.67 (15%, Repr)  | 14974088                          |
| 19:11200072<br>19:11089396   | c.-153C>T                                     | SREBP2                 | Not tested, considered pathogenic by location in conserved region (SREBP2) | -1.22 (42%, Repr) -<br>1.36 (38%, Repr)  | 15303010,<br>3030558,<br>10484771 |
| 19:11200073<br>19:11089397   | c.-152C>T                                     | SREBP2                 | 40% Luciferase                                                             | -1.33 (39%, Repr) -<br>1.60 (32%, Repr)  | 10484771                          |
| 19:11200079<br>19:11089403   | c.-146C>A                                     | Between SREBP2 and SP1 | Not tested                                                                 | -0.48 (71%, noEff) -<br>0.33 (79%, Repr) | 9259195                           |
| 19:11200083<br>19:11089407   | c.-142C>T                                     | SP1                    | 20% Luciferase                                                             | -2.28 (20%, Repr) -<br>3.09 (11%, Repr)  | 11792717                          |
| 19:11200085<br>19:11089409   | c.-140C>G                                     | SP1                    | 7% Luciferase                                                              | -2.15 (22%, Repr) -<br>3.29 (10%, Repr)  | 21538688                          |

|                            |            |                                |                                   |                                           |          |
|----------------------------|------------|--------------------------------|-----------------------------------|-------------------------------------------|----------|
| 19:11200085<br>19:11089409 | c.-140C>T  | SP1                            | 6% Luciferase                     | -2.87 (13%, Repr) -<br>3.55 (8%, Repr)    | 21538688 |
| 19:11200086<br>19:11089410 | c.-139C>A  | SP1                            | Not tested                        | -2.70 (15%, Repr) -<br>3.24 (10%, Repr)   | 16250003 |
| 19:11200086<br>19:11089410 | c.-139C>G  | SP1                            | 26% Luciferase                    | -2.70 (15%, Repr) -<br>3.31 (10%, Repr)   | 17625505 |
| 19:11200087<br>19:11089411 | c.-138T>C  | SP1                            | 24% LDLR activity                 | -2.36 (19%, Repr) -<br>2.75 (14%, Repr)   | 8589690  |
| 19:11200087<br>19:11089411 | c.-138delT | SP1                            | 25% Luciferase                    | -<br>-                                    | 14616764 |
| 19:11200088<br>19:11089412 | c.-137C>T  | SP1                            | Not tested                        | -2.59 (16%, Repr) -<br>3.52 (8%, Repr)    | 1301956  |
| 19:11200089<br>19:11089413 | c.-136C>G  | SP1                            | 12% Luciferase                    | -2.57 (16%, Repr) -<br>3.06 (11%, Repr)   | 21538688 |
| 19:11200089<br>19:11089413 | c.-136C>T  | SP1                            | 5% CAT assay                      | -2.62 (16%, Repr) -<br>3.51 (8%, Repr)    | 7937987  |
| 19:11200090<br>19:11089414 | c.-135C>G  | SP1                            | Pathogenic, LIPOchip<br>assay     | -2.70 (15%, Repr) -<br>3.01 (12%, Repr)   | 1301956  |
| 19:11200104<br>19:11089428 | c.-121T>C  | Between<br>TATA box and<br>SP1 | 72% Luciferase                    | -0.56 (67%, Repr) -<br>0.63 (64%, Repr)   | 20236128 |
| 19:11200105<br>19:11089429 | c.-120C>T  | Between<br>TATA box and<br>SP1 | 3% Luciferase / 10%<br>Luciferase | -0.14 (90%, noEff) -<br>0.17 (88%, Repr)  | 15303010 |
| 19:11200124<br>19:11089448 | c.-101T>C  | TATA BOX                       | 64% Luciferase                    | -0.32 (80%, Repr) -<br>0.31 (80%, Repr)   | 22881376 |
| 19:11200137<br>19:11089461 | c.-88G>A   | 5'UTR                          | 100% Luciferase                   | -0.23 (85%, Repr) -<br>0.05 (96%, noEff)  | 21538688 |
| 19:11200157<br>19:11089481 | c.-68A>C   | 5'UTR                          | Not tested                        | -0.16 (89%, noEff) -<br>0.04 (97%, noEff) | 15556094 |
| 19:11200189<br>19:11089513 | c.-36T>G   | 5'UTR                          | 100% Luciferase                   | 0.10 (107%, noEff)<br>0.18 (113%, noEff)  | 21538688 |
| 19:11200202<br>19:11089526 | c.-23A>C   | 5'UTR                          | Not tested                        | -<br>0.09 (106%, noEff)                   | 15241806 |
| 19:11200211<br>19:11089535 | c.-14C>A   | 5'UTR                          | Not tested                        | 0.18 (113%, noEff)<br>-0.05 (96%, noEff)  | 9259195  |
| 19:11200212<br>19:11089536 | c.-13A>G   | 5'UTR                          | 100% Luciferase                   | -0.03 (97%, noEff)<br>0.09 (106%, noEff)  | 20828696 |
| 19:11200220<br>19:11089544 | c.-5C>T    | 5'UTR                          | Not tested                        | 0.01 (100%, noEff)<br>-0.07 (95%, noEff)  | 16250003 |

### Supplementary Table 13

**Variants that are significantly different between the knockdown of the scrambled siRNA and siGABPA (non-overlapping 95% confidence intervals).** In addition the motif of the Ets-family with the highest change in the position weight matrix (PWM) is reported where available. For the majority of significantly different variants, a member of the Ets-family transcription factors is annotated or matched using PWMs in JASPAR 2018<sup>6</sup>. The variants NM\_198253.2:c.-146C>A and c.-124C>A create similar ETV/GABPA binding motifs to the previously known variants at the same positions, as observed in previous studies<sup>49</sup>. A new ETV motif is created by c.-79C>A, c.-78delT and c.-77C>T, and a novel GABPA/ETS1 motif is created by c.-189A>G, c.-189A>T or c.-126C>T. Finally, two of the three less common activating variants identified in cancer studies<sup>50–52</sup>, c.-45G>A and c.-57A>C, create an ETS motif. Following Jaspar IDs (including motif name) of the Ets-family are used: MA0062.1 (GABPA), MA0098.3 (ETS1), MA0764.1 (ETV4), MA0765.1 (ETV5), MA0645.1 (ETV6), MA0076.2 (ELK4).

| Coordinates [GRCh37, GRCh38] | Variants (NM_198253.2) | Log <sub>2</sub> variant effect scramble siRNA | Log <sub>2</sub> variant effect siGABPA | Motif | PWM score change |
|------------------------------|------------------------|------------------------------------------------|-----------------------------------------|-------|------------------|
| 5:1295293<br>5:1295178       | c.-189A>G              | 0.56                                           | 0.25                                    | GABPA | 4.95             |
| 5:1295293<br>5:1295178       | c.-189A>T              | 0.25                                           | -0.06                                   | GABPA | 2.95             |
| 5:1295292<br>5:1295177       | c.-188G>C              | -1.01                                          | -0.30                                   | GABPA | -2.11            |
| 5:1295267<br>5:1295152       | c.-163G>A              | -0.71                                          | -0.53                                   |       |                  |
| 5:1295264<br>5:1295149       | c.-160C>T              | -0.46                                          | -0.28                                   |       |                  |
| 5:1295250<br>5:1295135       | c.-146C>T              | 2.47                                           | 1.65                                    | GABPA | 5.17             |
| 5:1295248<br>5:1295133       | c.-144C>T              | -0.36                                          | -0.18                                   | GABPA | -5.17            |
| 5:1295245<br>5:1295130       | c.-141G>A              | 0.33                                           | 0.10                                    | GABPA | -2.59            |
| 5:1295238<br>5:1295123       | c.-134G>A              | -0.32                                          | -0.15                                   |       |                  |
| 5:1295237<br>5:1295122       | c.-133C>T              | 0.24                                           | 0.02                                    |       |                  |
| 5:1295232<br>5:1295117       | c.-128C>A              | -1.01                                          | -0.64                                   |       |                  |
| 5:1295232<br>5:1295117       | c.-128C>T              | -0.75                                          | -0.56                                   |       |                  |
| 5:1295231<br>5:1295116       | c.-127C>T              | -0.63                                          | -0.46                                   | GABPA | -4.39            |

|                        |            |       |       |       |        |
|------------------------|------------|-------|-------|-------|--------|
| 5:1295230<br>5:1295115 | c.-126C>T  | 0.35  | 0.16  | GABPA | 1.42   |
| 5:1295228<br>5:1295113 | c.-124C>A  | 1.75  | 1.31  | ETV4  | 5.86   |
| 5:1295228<br>5:1295113 | c.-124C>T  | 2.9   | 1.99  | ETV6  | 7.70   |
| 5:1295225<br>5:1295110 | c.-121C>G  | -0.21 | 0.03  | ETV6  | -15.03 |
| 5:1295224<br>5:1295109 | c.-120G>A  | -0.23 | -0.04 | ETS1  | -13.71 |
| 5:1295215<br>5:1295100 | c.-111C>T  | 0.46  | 0.26  |       |        |
| 5:1295211<br>5:1295096 | c.-107C>T  | 0.65  | 0.46  |       |        |
| 5:1295210<br>5:1295095 | c.-106C>T  | -1.11 | -0.7  |       |        |
| 5:1295207<br>5:1295092 | c.-103delC | -0.8  | -0.51 | ELK4  | -0.89  |
| 5:1295207<br>5:1295092 | c.-103C>T  | -1.18 | -0.86 | ELK4  | 0.00   |
| 5:1295206<br>5:1295091 | c.-102C>A  | -1.7  | -1.41 | ELK4  | -8.70  |
| 5:1295206<br>5:1295091 | c.-102C>T  | -1.14 | -0.85 | ETV6  | -0.65  |
| 5:1295204<br>5:1295089 | c.-100C>A  | -0.87 | -0.4  | ETV6  | -15.03 |
| 5:1295204<br>5:1295089 | c.-100C>T  | -0.56 | -0.23 | ELK4  | -14.06 |
| 5:1295203<br>5:1295088 | c.-99T>A   | -0.86 | -0.48 | ELK4  | -14.06 |
| 5:1295203<br>5:1295088 | c.-99T>C   | -0.69 | -0.29 | ETV6  | -7.70  |
| 5:1295202<br>5:1295087 | c.-98T>A   | -1.39 | -1.02 | ETV6  | -15.03 |
| 5:1295202<br>5:1295087 | c.-98T>C   | -1.02 | -0.57 | ELK4  | -14.06 |
| 5:1295201<br>5:1295086 | c.-97delC  | -0.98 | -0.39 | ELK4  | -2.00  |
| 5:1295201<br>5:1295086 | c.-97C>A   | -1.13 | -0.62 | ELK4  | -11.29 |
| 5:1295201<br>5:1295086 | c.-97C>T   | -0.85 | -0.39 | ETV5  | -14.40 |
| 5:1295200<br>5:1295085 | c.-96C>T   | -1.15 | -0.58 | ETV5  | -14.40 |
| 5:1295199<br>5:1295084 | c.-95T>A   | -1.03 | -0.55 | ELK4  | -14.06 |



|                        |           |       |       |       |        |
|------------------------|-----------|-------|-------|-------|--------|
| 5:1295199<br>5:1295084 | c.-95T>C  | -0.49 | -0.24 | ETV4  | -3.83  |
| 5:1295197<br>5:1295082 | c.-93T>A  | -0.88 | -0.36 | ETV6  | -15.03 |
| 5:1295191<br>5:1295076 | c.-87G>A  | -0.32 | -0.17 |       |        |
| 5:1295188<br>5:1295073 | c.-84C>T  | -0.47 | -0.22 |       |        |
| 5:1295187<br>5:1295072 | c.-83C>T  | -0.51 | -0.28 |       |        |
| 5:1295187<br>5:1295072 | c.-83C>A  | -0.63 | -0.25 |       |        |
| 5:1295185<br>5:1295070 | c.-81C>A  | -1.01 | -0.41 |       |        |
| 5:1295185<br>5:1295070 | c.-81C>T  | -0.66 | -0.29 |       |        |
| 5:1295184<br>5:1295069 | c.-80C>T  | -0.6  | -0.25 | ETV6  | -0.65  |
| 5:1295183<br>5:1295068 | c.-79C>A  | -0.17 | 0.19  | ETV6  | 4.84   |
| 5:1295182<br>5:1295067 | c.-78delT | 0.36  | -1.19 | ETV6  | 1.29   |
| 5:1295181<br>5:1295066 | c.-77C>T  | 0.89  | 0.48  | ETV6  | 7.70   |
| 5:1295171<br>5:1295056 | c.-67C>T  | 0.82  | 0.56  |       |        |
| 5:1295169<br>5:1295054 | c.-65C>T  | 1.08  | 0.88  |       |        |
| 5:1295164<br>5:1295049 | c.-60T>C  | 0.68  | 0.55  | GABPA | -5.17  |
| 5:1295161<br>5:1295046 | c.-57A>C  | 1.37  | 0.69  | ETS1  | 13.71  |
| 5:1295159<br>5:1295044 | c.-55G>A  | -0.52 | -0.31 | ETS1  | -6.92  |
| 5:1295149<br>5:1295034 | c.-45G>A  | 0.03  | -0.13 | ETV5  | 0.83   |
| 5:1295146<br>5:1295031 | c.-42C>A  | -0.09 | 0.38  | ETV5  | -5.72  |
| 5:1295140<br>5:1295025 | c.-36C>G  | -0.22 | 0.01  |       |        |
| 5:1295138<br>5:1295023 | c.-34C>T  | 0.12  | 0.41  |       |        |
| 5:1295137<br>5:1295022 | c.-33A>G  | -0.05 | 0.08  |       |        |
| 5:1295136<br>5:1295021 | c.-32C>T  | 0.18  | 0.31  |       |        |

|                        |          |       |      |  |  |
|------------------------|----------|-------|------|--|--|
| 5:1295134<br>5:1295019 | c.-30T>C | 0.14  | 0.31 |  |  |
| 5:1295133<br>5:1295018 | c.-29G>A | 0.03  | 0.25 |  |  |
| 5:1295111<br>5:1294996 | c.-7C>A  | -0.17 | 0.01 |  |  |
| 5:1295104<br>5:1294989 | c.1delA  | 0.55  | 0.21 |  |  |

## Supplementary Table 14

**Pearson correlation of computational scores with measured expression effects of all SNVs with at least 10 tags.** The table reports Pearson correlation coefficients of the absolute expression effect for each element with various measures agnostic to the cell-type. If the wild-type allele at a position did not match the human reference genome, the position was excluded. The measures include conservation (PhyloP, PhastCons, GERP++), overlapping TFBS as predicted in JASPAR 2018 (exploring different score thresholds or factors predicted most frequently across the region; for details see Methods) and computational tools that integrate large sets of functional genomics data in combined scores (CADD, DeepSEA, Eigen, FATHMM-MKL, FunSeq2, GWAVA, LINSIGHT, ReMM). Eigen scores are not defined on the X chromosome (F9). In addition, we compared a subset of experiments (10/21) to sequence-based models (deltaSVM) publically available only for specific cell-types (HEK293T, HeLa S3, HepG2, K562, and LNCaP). The table lists correlations with absolute expression effects in all rows other than "deltaSVM", where directionality of the expression alteration was considered. In cases where an annotation is based on positions rather than alleles, we assumed the same value for all substitutions at each position. MYC (rs11986220) is abbreviated to MYCs1 and MYC (rs6983267) abbreviated to MYCs2. TERT-GBM is abbreviated as TERT-G. Blue bars denote positive and red bars negative correlation.

| Name           | BCL11A | F9    | FOXE1 | GP1BB | HBB   | HBG1  | HNF4a | IRF4  | IRF6  | LDLR.2 | MSMB  | MYCs1 | MYCs2 | PKLR_48h | RET   | SORT1.1 | TCF7L2 | TERT-G | UC88  | ZFAND3 | ZRSh13 |
|----------------|--------|-------|-------|-------|-------|-------|-------|-------|-------|--------|-------|-------|-------|----------|-------|---------|--------|--------|-------|--------|--------|
| Type           | enh.   | prom. | prom. | prom. | prom. | prom. | prom. | enh.  | enh.  | prom.  | prom. | enh.  | enh.  | prom.    | enh.  | enh.    | enh.   | prom.  | UC    | enh.   | enh.   |
| CADD v1.0      | -0.03  | 0.07  | -0.01 | -0.05 | 0.02  | 0.17  | 0.14  | 0.40  | 0.21  | 0.41   | 0.07  | -0.01 | -0.06 | 0.24     | 0.13  | -0.26   | 0.03   | 0.13   | -0.02 | 0.36   | 0.20   |
| CADD v1.3      | -0.04  | 0.09  | -0.07 | -0.09 | 0.00  | 0.10  | 0.10  | 0.42  | 0.18  | 0.57   | 0.01  | -0.06 | -0.06 | 0.39     | 0.14  | -0.28   | -0.01  | -0.02  | -0.02 | 0.40   | 0.15   |
| CADD v1.4      | -0.05  | 0.07  | -0.03 | 0.04  | 0.07  | 0.25  | 0.14  | 0.49  | 0.20  | 0.64   | 0.06  | -0.03 | -0.03 | 0.51     | 0.17  | -0.23   | 0.03   | 0.10   | 0.00  | 0.43   | 0.04   |
| FunSeq         | 0.00   | -0.03 | 0.05  | 0.19  | 0.13  | 0.13  | 0.08  | 0.35  | 0.12  | 0.36   | 0.23  | 0.02  | 0.01  | 0.47     | 0.10  | 0.07    | 0.09   | 0.15   | 0.06  | 0.25   | -0.08  |
| Eigen          | -0.03  |       | 0.00  | 0.03  | 0.15  | 0.27  | 0.14  | 0.52  | 0.18  | 0.63   | 0.11  | -0.04 | -0.05 | 0.51     | 0.18  | -0.23   | 0.09   | 0.23   | -0.01 | 0.44   | 0.06   |
| FATHMM         | 0.00   | -0.01 | 0.01  | 0.11  | 0.09  | 0.40  | 0.10  | 0.37  | 0.18  | 0.55   | 0.12  | 0.04  | -0.01 | 0.54     | 0.17  | -0.13   | 0.06   | 0.20   | 0.01  | 0.44   | 0.07   |
| DeepSEA        | 0.02   | 0.17  | 0.01  | 0.19  | 0.21  | 0.25  | 0.13  | 0.32  | 0.12  | 0.31   | 0.16  | 0.02  | 0.09  | 0.33     | 0.11  | -0.05   | 0.09   | 0.31   | 0.04  | 0.33   | 0.04   |
| LINSIGHT       | -0.01  | 0.08  | -0.02 | 0.10  | 0.13  | 0.09  | 0.14  | 0.46  | 0.14  | 0.51   | 0.02  | -0.06 | -0.10 | 0.57     | 0.19  | -0.20   | -0.03  | 0.11   | -0.02 | 0.88   | 0.04   |
| ReMM           | -0.01  | 0.04  | -0.01 | 0.09  | 0.10  | 0.05  | 0.07  | 0.23  | 0.09  | 0.37   | -0.05 | -0.03 | -0.01 | 0.20     | 0.11  | -0.21   | -0.02  | 0.11   | 0.02  | 0.24   | -0.01  |
| GWAVA_U        | 0.02   | 0.05  | -0.03 | 0.22  | 0.10  | -0.01 | 0.01  | -0.18 | -0.02 | 0.11   | 0.04  | -0.03 | -0.15 | 0.32     | 0.01  | -0.12   | -0.02  | -0.22  | 0.05  | 0.16   | -0.19  |
| GWAVA_T        | -0.04  | 0.14  | -0.03 | 0.23  | 0.03  | 0.03  | 0.11  | 0.25  | -0.03 | 0.11   | 0.07  | 0.06  | -0.13 | 0.18     | 0.04  | 0.03    | 0.14   | -0.23  | -0.05 | 0.22   | -0.02  |
| GWAVA_R        | 0.02   | 0.10  | -0.06 | 0.24  | 0.11  | 0.04  | 0.08  | 0.15  | -0.06 | 0.07   | 0.24  | -0.03 | -0.01 | 0.26     | 0.10  | 0.16    | 0.04   | -0.03  | 0.05  | 0.07   | -0.15  |
| deltaSVM       | 0.44   | 0.05  |       |       |       |       | 0.07  |       |       | 0.26   | 0.23  | 0.12  | 0.23  | 0.48     |       | 0.54    |        | 0.27   |       |        |        |
| deltaSVM (abs) | 0.25   | 0.01  |       |       |       |       | 0.03  |       |       | 0.28   | 0.14  | 0.07  | 0.20  | 0.42     |       | 0.39    |        | 0.21   |       |        |        |
| JASPAR_All     | 0.00   | 0.05  | 0.02  | 0.20  | 0.12  | 0.02  | 0.14  | 0.22  | 0.07  | -0.01  | 0.15  | 0.05  | -0.06 | 0.07     | 0.11  | 0.17    | 0.08   | 0.14   | 0.07  | 0.12   | 0.04   |
| JASPAR_90      | 0.02   | 0.05  | 0.02  | 0.19  | 0.14  | 0.03  | 0.14  | 0.23  | 0.08  | -0.04  | 0.15  | 0.05  | -0.05 | 0.09     | 0.11  | 0.17    | 0.07   | 0.14   | 0.08  | 0.11   | 0.04   |
| JASPAR_75      | 0.02   | 0.08  | 0.01  | 0.21  | 0.14  | 0.03  | 0.16  | 0.24  | 0.08  | -0.07  | 0.14  | 0.06  | -0.04 | 0.14     | 0.11  | 0.17    | 0.08   | 0.15   | 0.09  | 0.11   | 0.04   |
| JASPAR_50      | 0.04   | 0.11  | 0.01  | 0.18  | 0.16  | 0.08  | 0.12  | 0.25  | 0.10  | 0.02   | 0.14  | 0.06  | -0.03 | 0.21     | 0.11  | 0.18    | 0.08   | 0.18   | 0.11  | 0.12   | 0.04   |
| JASPAR_25      | 0.05   | 0.17  | -0.01 | 0.18  | 0.08  | 0.03  | 0.12  | 0.24  | 0.10  | 0.16   | 0.17  | 0.07  | 0.00  | 0.27     | 0.08  | 0.20    | 0.06   | 0.11   | 0.14  | 0.13   | 0.03   |
| JASPAR_10      | 0.05   | 0.18  | -0.02 | 0.18  | 0.08  | 0.04  | 0.13  | 0.28  | 0.06  | 0.32   | 0.14  | 0.05  | 0.08  | 0.22     | 0.06  | 0.13    | 0.08   | 0.14   | 0.12  | 0.07   | 0.08   |
| JASPAR_freqTF  | -0.03  | 0.23  | 0.02  | -0.14 | 0.13  | 0.00  | 0.00  | 0.00  | -0.05 | 0.04   | -0.02 | 0.03  | -0.05 | 0.21     | -0.02 | -0.02   | 0.13   | 0.15   | 0.11  | 0.08   | 0.00   |
| priPhCons      | -0.02  | 0.13  | 0.02  | -0.14 | 0.05  | 0.11  | 0.12  | 0.37  | 0.17  | 0.51   | 0.03  | 0.03  | -0.09 | 0.30     | 0.14  | -0.27   | -0.02  | 0.01   | 0.03  | 0.39   | 0.00   |
| mamPhCons      | -0.01  | 0.05  | -0.01 | 0.10  | 0.11  | 0.34  | 0.10  | 0.51  | 0.16  | 0.64   | 0.11  | 0.03  | 0.02  | 0.55     | 0.18  | -0.20   | 0.04   | -0.05  | 0.02  | 0.44   | 0.00   |
| verPhCons      | -0.01  | -0.01 | -0.01 | 0.09  | 0.09  | 0.39  | 0.10  | 0.34  | 0.18  | 0.62   | 0.12  | 0.03  | 0.02  | 0.54     | 0.18  | -0.20   | 0.04   | 0.12   | 0.01  | 0.45   | 0.06   |
| priPhyloP      | -0.06  | 0.00  | -0.01 | 0.08  | 0.11  | 0.00  | 0.04  | 0.14  | 0.07  | 0.28   | 0.00  | -0.04 | 0.00  | 0.11     | 0.05  | -0.13   | 0.01   | 0.16   | 0.04  | 0.12   | 0.01   |
| mamPhyloP      | -0.01  | 0.00  | 0.01  | 0.13  | 0.18  | 0.18  | 0.11  | 0.35  | 0.17  | 0.45   | 0.02  | -0.04 | 0.02  | 0.36     | 0.11  | -0.14   | 0.04   | 0.10   | -0.01 | 0.27   | 0.06   |
| verPhyloP      | -0.01  | 0.02  | -0.01 | 0.10  | 0.14  | 0.20  | 0.11  | 0.37  | 0.21  | 0.51   | 0.02  | -0.04 | -0.02 | 0.38     | 0.12  | -0.15   | 0.04   | 0.11   | -0.05 | 0.26   | 0.07   |
| GerpN          | -0.01  | 0.13  | 0.02  | 0.03  | 0.09  | -0.12 | 0.11  | 0.29  | 0.04  | 0.46   | 0.26  | 0.00  | -0.04 | 0.26     | 0.13  | -0.31   | 0.14   | 0.17   | -0.03 | 0.32   | 0.09   |

## Supplementary Table 15

**Spearman correlation of computational scores with measured expression effects of all SNVs with at least 10 tags.** The table reports Spearman correlation coefficients of the absolute expression effect for each element with various measures agnostic to the cell-type. If the wild-type allele at a position did not match the human reference genome, the position was excluded. The measures include conservation (PhyloP, PhastCons, GERP++), overlapping TFBS as predicted in JASPAR 2018 (exploring different score thresholds or factors predicted most frequently across the region; for details see Methods) and computational tools that integrate large sets of functional genomics data in combined scores (CADD, DeepSEA, Eigen, FATHMM-MKL, FunSeq2, GWAVA, LINSIGHT, ReMM). Eigen scores are not defined on the X chromosome (F9). In addition, we compared a subset of experiments (10/21) to sequence-based models (deltaSVM) publically available only for specific cell-types (HEK293T, HeLa S3, HepG2, K562, and LNCaP). The table lists correlations with absolute expression effects in all rows other than "deltaSVM", where directionality of the expression alteration was considered. In cases where an annotation is based on positions rather than alleles, we assumed the same value for all substitutions at each position. MYC (rs11986220) is abbreviated to MYCs1 and MYC (rs6983267) abbreviated to MYCs2. TERT-GBM is abbreviated as TERT-G. Blue bars denote positive and red bars negative correlation.

| Name           | BCL11A | F9    | FOXE1 | GP1BB | HBB   | HBG1  | HNF4a | IRF4  | IRF6  | LDLR.2 | MSMB  | MYCs1 | MYCs2 | PKLR_48h | RET  | SORT1.1 | TCF7L2 | TERT-G | UC88  | ZFAND3 | ZRSh13 |
|----------------|--------|-------|-------|-------|-------|-------|-------|-------|-------|--------|-------|-------|-------|----------|------|---------|--------|--------|-------|--------|--------|
| Type           | enh.   | prom. | prom. | prom. | prom. | prom. | prom. | enh.  | enh.  | prom.  | prom. | enh.  | enh.  | prom.    | enh. | enh.    | enh.   | prom.  | UC    | enh.   | enh.   |
| CADD v1.0      | -0.05  | -0.03 | -0.01 | -0.06 | 0.00  | 0.03  | 0.20  | 0.42  | 0.15  | 0.24   | 0.06  | -0.03 | -0.12 | 0.17     | 0.11 | -0.18   | 0.03   | 0.15   | -0.07 | 0.85   | 0.13   |
| CADD v1.3      | -0.07  | -0.05 | -0.06 | -0.05 | 0.03  | 0.00  | 0.15  | 0.43  | 0.14  | 0.41   | -0.01 | -0.07 | -0.10 | 0.17     | 0.10 | -0.21   | -0.01  | 0.02   | -0.04 | 0.37   | 0.12   |
| CADD v1.4      | -0.07  | -0.03 | -0.03 | 0.05  | 0.08  | 0.10  | 0.20  | 0.41  | 0.19  | 0.51   | 0.03  | -0.05 | -0.09 | 0.20     | 0.12 | -0.15   | 0.01   | 0.16   | -0.05 | 0.40   | 0.02   |
| FunSeq         | 0.00   | -0.02 | 0.04  | 0.13  | 0.11  | 0.11  | 0.10  | 0.40  | 0.12  | 0.40   | 0.23  | 0.02  | 0.02  | 0.89     | 0.07 | 0.28    | 0.12   | 0.21   | 0.06  | 0.23   | 0.00   |
| Eigen          | -0.03  |       | 0.02  | 0.00  | 0.15  | 0.16  | 0.22  | 0.48  | 0.19  | 0.58   | 0.10  | -0.01 | -0.04 | 0.25     | 0.13 | -0.13   | 0.09   | 0.20   | -0.04 | 0.40   | 0.07   |
| FATHMM         | 0.02   | 0.03  | 0.04  | 0.10  | 0.11  | 0.15  | 0.18  | 0.29  | 0.23  | 0.59   | 0.14  | 0.01  | -0.09 | 0.26     | 0.11 | 0.02    | 0.04   | 0.20   | -0.03 | 0.40   | 0.07   |
| DeepSEA        | 0.03   | 0.23  | 0.05  | 0.25  | 0.29  | 0.26  | 0.25  | 0.47  | 0.28  | 0.56   | 0.20  | 0.04  | 0.12  | 0.34     | 0.14 | 0.06    | 0.06   | 0.37   | 0.11  | 0.44   | 0.07   |
| LINSIGHT       | -0.09  | -0.02 | 0.03  | 0.09  | 0.12  | 0.13  | 0.22  | 0.44  | 0.15  | 0.56   | 0.15  | -0.09 | -0.11 | 0.41     | 0.05 | -0.16   | 0.05   | 0.11   | -0.03 | 0.88   | 0.03   |
| ReMM           | -0.02  | 0.04  | -0.01 | 0.07  | 0.11  | 0.00  | 0.14  | 0.30  | 0.19  | 0.52   | -0.09 | -0.03 | -0.01 | 0.19     | 0.14 | -0.16   | -0.06  | 0.00   | -0.07 | 0.30   | 0.05   |
| GWAVA_U        | 0.00   | 0.10  | -0.04 | 0.28  | 0.03  | -0.09 | -0.04 | -0.07 | 0.06  | 0.06   | 0.01  | -0.03 | -0.11 | 0.32     | 0.01 | -0.20   | -0.03  | -0.23  | 0.07  | 0.16   | -0.15  |
| GWAVA_T        | -0.01  | 0.14  | -0.03 | 0.23  | 0.09  | -0.08 | 0.18  | 0.23  | 0.03  | 0.00   | 0.08  | 0.06  | -0.10 | 0.18     | 0.02 | 0.09    | 0.16   | -0.28  | -0.05 | 0.24   | 0.02   |
| GWAVA_R        | -0.02  | 0.04  | -0.09 | 0.28  | 0.05  | -0.03 | 0.09  | 0.24  | -0.01 | 0.04   | 0.27  | -0.02 | 0.02  | 0.32     | 0.10 | 0.15    | 0.05   | -0.04  | 0.04  | 0.09   | -0.15  |
| deltaSVM       | 0.43   | 0.04  |       |       |       |       | 0.09  |       |       | 0.21   | 0.19  | 0.12  | 0.12  | 0.89     |      | 0.53    |        | 0.26   |       |        |        |
| deltaSVM (abs) | 0.20   | 0.01  |       |       |       | 0.03  |       |       |       | 0.15   | 0.11  | 0.06  | 0.08  | 0.21     |      | 0.28    |        | 0.12   |       |        |        |
| JASPAR_A       | -0.01  | 0.11  | 0.01  | 0.28  | -0.01 | -0.02 | 0.11  | 0.14  | 0.06  | -0.02  | 0.22  | 0.06  | -0.09 | 0.03     | 0.13 | 0.21    | 0.13   | 0.05   | 0.04  | 0.15   | 0.00   |
| JASPAR_90      | 0.00   | 0.12  | 0.01  | 0.27  | 0.02  | -0.01 | 0.10  | 0.13  | 0.05  | -0.05  | 0.22  | 0.06  | -0.08 | 0.05     | 0.13 | 0.21    | 0.12   | 0.05   | 0.04  | 0.14   | 0.00   |
| JASPAR_75      | 0.00   | 0.17  | 0.00  | 0.30  | 0.01  | -0.01 | 0.11  | 0.13  | 0.07  | -0.04  | 0.21  | 0.06  | -0.09 | 0.11     | 0.15 | 0.23    | 0.13   | 0.06   | 0.05  | 0.13   | 0.00   |
| JASPAR_50      | 0.01   | 0.23  | 0.00  | 0.28  | 0.04  | 0.03  | 0.09  | 0.18  | 0.06  | 0.06   | 0.20  | 0.06  | -0.07 | 0.14     | 0.15 | 0.28    | 0.13   | 0.08   | 0.05  | 0.13   | 0.00   |
| JASPAR_25      | 0.01   | 0.39  | 0.00  | 0.29  | 0.05  | 0.00  | 0.08  | 0.24  | 0.06  | 0.18   | 0.21  | 0.05  | -0.02 | 0.21     | 0.16 | 0.33    | 0.15   | -0.02  | 0.04  | 0.11   | -0.01  |
| JASPAR_10      | 0.01   | 0.52  | 0.00  | 0.33  | 0.05  | 0.01  | 0.10  | 0.26  | 0.02  | 0.39   | 0.17  | 0.02  | 0.07  | 0.15     | 0.17 | 0.29    | 0.15   | 0.07   | 0.01  | 0.04   | 0.05   |
| JASPAR_TF      | 0.00   | 0.24  | 0.01  | 0.14  | 0.10  | -0.08 | -0.02 | 0.01  | 0.01  | -0.04  | -0.02 | 0.03  | -0.04 | 0.08     | 0.02 | -0.03   | 0.15   | 0.14   | 0.10  | 0.14   | -0.02  |
| priPhCons      | -0.02  | 0.07  | -0.01 | -0.11 | 0.00  | -0.03 | 0.23  | 0.40  | 0.15  | 0.54   | 0.01  | 0.00  | -0.13 | 0.18     | 0.15 | -0.19   | -0.02  | 0.09   | -0.03 | 0.37   | 0.01   |
| mamPhCons      | -0.01  | 0.04  | -0.01 | 0.04  | 0.10  | 0.21  | 0.20  | 0.31  | 0.21  | 0.57   | 0.06  | 0.00  | -0.04 | 0.23     | 0.13 | -0.12   | 0.00   | 0.16   | -0.02 | 0.41   | 0.01   |
| verPhCons      | -0.01  | -0.01 | -0.02 | 0.04  | 0.08  | 0.23  | 0.20  | 0.24  | 0.23  | 0.58   | 0.06  | 0.00  | -0.05 | 0.20     | 0.13 | -0.11   | 0.00   | 0.18   | -0.01 | 0.40   | 0.06   |
| priPhyloP      | -0.01  | 0.01  | 0.02  | 0.13  | 0.11  | 0.03  | 0.02  | 0.23  | 0.07  | 0.35   | 0.05  | 0.00  | 0.05  | 0.06     | 0.04 | -0.12   | 0.02   | 0.12   | 0.03  | 0.18   | 0.04   |
| mamPhyloP      | -0.01  | 0.03  | 0.02  | 0.05  | 0.19  | 0.12  | 0.15  | 0.24  | 0.17  | 0.44   | 0.00  | 0.00  | 0.01  | 0.17     | 0.11 | -0.11   | 0.03   | 0.14   | -0.02 | 0.27   | 0.06   |
| verPhyloP      | -0.01  | 0.05  | 0.00  | 0.06  | 0.14  | 0.13  | 0.14  | 0.24  | 0.20  | 0.47   | 0.00  | 0.00  | -0.02 | 0.16     | 0.11 | -0.11   | 0.03   | 0.14   | -0.05 | 0.27   | 0.07   |
| GerpN          | -0.01  | -0.02 | 0.01  | 0.01  | 0.05  | -0.03 | 0.22  | 0.47  | 0.04  | 0.59   | 0.31  | -0.01 | -0.10 | 0.28     | 0.11 | -0.28   | 0.17   | 0.13   | -0.10 | 0.37   | 0.07   |

### Supplementary Table 16

**Performance of computational scores for binary classification of promoter variants with high and low expression effect.** The top 200, 500, and 1000 highest expression effect promoter variants ( $p$ -value  $< 10^{-5}$ , min tags 10) were selected and matched with no effect variants ( $\log_2$  expression effect  $< 0.05$ : min tags 10). The same number of effect/no effect variants was sampled for each element, without normalizing each elements' contribution to the overall set. In fact, the three elements contributing the most are top 200: IRF4 (44%), SORT1.1 (42%), IRF6 (14%), top 500: SORT1.1 (44%), IRF4 (35%), IRF6 (16%) and top 1000: SORT1.1 (42%), IRF4 (31%), IRF6 (14%). The average of the area under the receiver operating characteristic (AUROC) and precision-recall curves (AUPRC) of 100 sampling rounds is shown with the standard deviation (SD). Computational scores include conservation (PhyloP, PhastCons, GERP++), overlapping TFBS as predicted in JASPAR 2018 (exploring different score thresholds; for details see Methods) and computational tools that integrate functional genomics data in combined scores (CADD, DeepSEA, Eigen, FATHMM-MKL, FunSeq2, GWAVA, LINSIGHT, ReMM). DeltaSVM was only used on a subset of experiments (10/21, see also *Supplementary Table 14*) for which cell-types were publically available (HEK293T, HeLa S3, HepG2, K562, and LNCaP). In cases where an annotation is based on positions rather than alleles, we assumed the same value for all substitutions at each position. Bold text highlights the best performing method.

| Score          | Top 200      |               |              |               | Top 500      |               |              |               | Top 1000     |               |              |               |
|----------------|--------------|---------------|--------------|---------------|--------------|---------------|--------------|---------------|--------------|---------------|--------------|---------------|
|                | AUROC        | SD            | AUPRC        | SD            | AUROC        | SD            | AUPRC        | SD            | AUROC        | SD            | AUPRC        | SD            |
| CADD v1.0      | 0.788        | ±0.014        | 0.792        | ±0.019        | 0.656        | ±0.008        | 0.649        | ±0.011        | 0.596        | ±0.004        | 0.589        | ±0.007        |
| CADD v1.3      | 0.828        | ±0.010        | 0.845        | ±0.014        | 0.665        | ±0.007        | 0.680        | ±0.011        | 0.603        | ±0.004        | 0.607        | ±0.008        |
| CADD v1.4      | 0.895        | ±0.008        | 0.90         | ±0.017        | 0.736        | ±0.005        | 0.747        | ±0.012        | 0.653        | ±0.004        | 0.662        | ±0.009        |
| FunSeq         | 0.733        | ±0.008        | 0.739        | ±0.015        | 0.633        | ±0.004        | 0.645        | ±0.007        | 0.599        | ±0.002        | 0.623        | ±0.003        |
| Eigen          | 0.864        | ±0.007        | 0.883        | ±0.014        | 0.691        | ±0.004        | 0.742        | ±0.010        | 0.623        | ±0.003        | 0.679        | ±0.007        |
| FATHMM         | 0.749        | ±0.006        | 0.805        | ±0.009        | 0.659        | ±0.003        | 0.716        | ±0.005        | 0.602        | ±0.002        | 0.679        | ±0.001        |
| DeepSEA        | <b>0.910</b> | <b>±0.009</b> | <b>0.903</b> | <b>±0.012</b> | <b>0.829</b> | <b>±0.005</b> | <b>0.826</b> | <b>±0.007</b> | <b>0.754</b> | <b>±0.003</b> | <b>0.770</b> | <b>±0.005</b> |
| LINSIGHT       | <b>0.909</b> | <b>±0.008</b> | <b>0.907</b> | <b>±0.012</b> | 0.789        | ±0.006        | 0.781        | ±0.009        | 0.716        | ±0.004        | 0.709        | ±0.008        |
| ReMM           | 0.891        | ±0.007        | 0.911        | ±0.007        | 0.736        | ±0.006        | 0.770        | ±0.008        | 0.663        | ±0.003        | 0.699        | ±0.006        |
| GWAVA_U        | 0.591        | ±0.016        | 0.505        | ±0.011        | 0.585        | ±0.008        | 0.532        | ±0.006        | 0.586        | ±0.004        | 0.555        | ±0.002        |
| GWAVA_T        | 0.559        | ±0.016        | 0.489        | ±0.009        | 0.547        | ±0.009        | 0.497        | ±0.005        | 0.531        | ±0.004        | 0.503        | ±0.002        |
| GWAVA_R        | 0.606        | ±0.015        | 0.532        | ±0.011        | 0.577        | ±0.009        | 0.517        | ±0.005        | 0.575        | ±0.007        | 0.533        | ±0.002        |
| DeltaSVM (abs) | 0.563        | ±0.006        | 0.628        | ±0.009        | 0.536        | ±0.003        | 0.590        | ±0.006        | 0.536        | ±0.001        | 0.590        | ±0.003        |

|           |              |               |              |               |       |        |       |        |       |        |       |        |
|-----------|--------------|---------------|--------------|---------------|-------|--------|-------|--------|-------|--------|-------|--------|
| JASPAR_A  | 0.584        | ±0.020        | 0.517        | ±0.016        | 0.587 | ±0.010 | 0.534 | ±0.009 | 0.576 | ±0.005 | 0.561 | ±0.005 |
| JASPAR_90 | 0.566        | ±0.019        | 0.513        | ±0.016        | 0.592 | ±0.010 | 0.541 | ±0.008 | 0.589 | ±0.005 | 0.569 | ±0.005 |
| JASPAR_75 | 0.574        | ±0.019        | 0.520        | ±0.016        | 0.602 | ±0.009 | 0.557 | ±0.009 | 0.601 | ±0.005 | 0.585 | ±0.005 |
| JASPAR_50 | 0.669        | ±0.018        | 0.612        | ±0.020        | 0.666 | ±0.008 | 0.616 | ±0.010 | 0.649 | ±0.004 | 0.629 | ±0.005 |
| JASPAR_25 | 0.747        | ±0.015        | 0.678        | ±0.022        | 0.706 | ±0.008 | 0.651 | ±0.011 | 0.668 | ±0.004 | 0.649 | ±0.005 |
| JASPAR_10 | 0.785        | ±0.012        | 0.739        | ±0.021        | 0.748 | ±0.007 | 0.705 | ±0.012 | 0.692 | ±0.004 | 0.686 | ±0.005 |
| JASPAR_TF | 0.618        | ±0.017        | 0.582        | ±0.018        | 0.601 | ±0.009 | 0.569 | ±0.009 | 0.574 | ±0.005 | 0.568 | ±0.006 |
| priPhCons | 0.831        | ±0.010        | 0.832        | ±0.017        | 0.689 | ±0.008 | 0.680 | ±0.011 | 0.606 | ±0.004 | 0.600 | ±0.007 |
| mamPhCons | <b>0.915</b> | <b>±0.007</b> | <b>0.919</b> | <b>±0.012</b> | 0.785 | ±0.005 | 0.784 | ±0.011 | 0.698 | ±0.004 | 0.694 | ±0.009 |
| verPhCons | <b>0.901</b> | <b>±0.007</b> | <b>0.910</b> | <b>±0.014</b> | 0.786 | ±0.005 | 0.795 | ±0.009 | 0.708 | ±0.004 | 0.718 | ±0.008 |
| priPhyloP | 0.723        | ±0.015        | 0.712        | ±0.015        | 0.644 | ±0.008 | 0.636 | ±0.008 | 0.599 | ±0.004 | 0.608 | ±0.005 |
| mamPhyloP | 0.848        | ±0.008        | 0.876        | ±0.009        | 0.745 | ±0.006 | 0.762 | ±0.007 | 0.665 | ±0.004 | 0.692 | ±0.006 |
| verPhyloP | 0.860        | ±0.007        | 0.808        | ±0.015        | 0.756 | ±0.006 | 0.764 | ±0.010 | 0.670 | ±0.004 | 0.694 | ±0.006 |
| GerpN     | 0.856        | ±0.010        | 0.852        | ±0.017        | 0.690 | ±0.005 | 0.701 | ±0.013 | 0.632 | ±0.003 | 0.641 | ±0.007 |

### Supplementary Table 17

**Performance of computational scores for binary classification of enhancers variants with high and low expression effect.** The top 200, 500, and 1000 highest expression effect enhancer variants ( $p$ -value  $< 10^{-5}$ , min tags 10) were selected and matched with no effect variants ( $\log_2$  expression effect  $< 0.05$ : min tags 10). The same number of effect/no effect variants was sampled for each element, without normalizing each elements' contribution to the overall set. In fact, the three elements contributing the most are top 200: LDLR.2 (53%), PKLR-48h (30%), TERT-GBM (13%), top 500: LDLR.2 (32%), PKLR-48h (29%), TERT-GBM (19%) and top 1000: LDLR.2 (26%), PKLR-48h (25%), TERT-GBM (18%). The average of the area under the receiver operating characteristic (AUROC) and precision-recall curves (AUPRC) of 100 sampling rounds is shown with standard deviation (SD). Computational scores include conservation (PhyloP, PhastCons, GERP++), overlapping TFBS as predicted in JASPAR 2018 (exploring different score thresholds; for details see Methods) and computational tools that integrate functional genomics data in combined scores (CADD, DeepSEA, Eigen, FATHMM-MKL, FunSeq2, GWAVA, LINSIGHT, ReMM). DeltaSVM was only used on a subset of experiments (10/21, see also *Supplementary Table 14*) for which cell-types were publically available (HEK293T, HeLa S3, HepG2, K562, and LNCaP). In cases where an annotation is based on positions rather than alleles, we assumed the same value for all substitutions at each position. Bold text marks the best performing method.

| Score          | Top 200 |        |       |        | Top 500      |               |              |               | Top 1000     |               |              |               |
|----------------|---------|--------|-------|--------|--------------|---------------|--------------|---------------|--------------|---------------|--------------|---------------|
|                | AUROC   | SD     | AUPRC | SD     | AUROC        | SD            | AUPRC        | SD            | AUROC        | SD            | AUPRC        | SD            |
| CADD v1.0      | 0.537   | ±0.009 | 0.655 | ±0.018 | 0.571        | ±0.005        | 0.647        | ±0.010        | 0.587        | ±0.003        | 0.651        | ±0.008        |
| CADD v1.3      | 0.548   | ±0.009 | 0.664 | ±0.014 | 0.575        | ±0.006        | 0.658        | ±0.009        | 0.592        | ±0.003        | 0.667        | ±0.006        |
| CADD v1.4      | 0.556   | ±0.014 | 0.542 | ±0.017 | 0.584        | ±0.008        | 0.557        | ±0.008        | 0.594        | ±0.004        | 0.580        | ±0.004        |
| FunSeq         | 0.651   | ±0.010 | 0.683 | ±0.012 | 0.640        | ±0.006        | 0.648        | ±0.008        | 0.652        | ±0.004        | 0.649        | ±0.005        |
| Eigen          | 0.585   | ±0.013 | 0.504 | ±0.010 | 0.584        | ±0.007        | 0.515        | ±0.005        | 0.588        | ±0.003        | 0.555        | ±0.002        |
| FATHMM         | 0.624   | ±0.016 | 0.568 | ±0.018 | 0.624        | ±0.007        | 0.580        | ±0.007        | 0.622        | ±0.004        | 0.612        | ±0.002        |
| DeepSEA        | 0.712   | ±0.015 | 0.713 | ±0.018 | <b>0.716</b> | <b>±0.006</b> | <b>0.726</b> | <b>±0.007</b> | <b>0.698</b> | <b>±0.004</b> | <b>0.718</b> | <b>±0.005</b> |
| LINSIGHT       | 0.579   | ±0.015 | 0.538 | ±0.016 | 0.590        | ±0.008        | 0.550        | ±0.007        | 0.598        | ±0.004        | 0.580        | ±0.003        |
| ReMM           | 0.553   | ±0.015 | 0.566 | ±0.018 | 0.576        | ±0.007        | 0.570        | ±0.007        | 0.580        | ±0.004        | 0.590        | ±0.004        |
| GWAVA_U        | 0.444   | ±0.007 | 0.441 | ±0.004 | 0.456        | ±0.003        | 0.451        | ±0.003        | 0.482        | ±0.002        | 0.494        | ±0.001        |
| GWAVA_T        | 0.572   | ±0.008 | 0.572 | ±0.015 | 0.538        | ±0.004        | 0.539        | ±0.006        | 0.530        | ±0.002        | 0.568        | ±0.001        |
| GWAVA_R        | 0.586   | ±0.011 | 0.589 | ±0.017 | 0.576        | ±0.006        | 0.584        | ±0.008        | 0.557        | ±0.003        | 0.594        | ±0.002        |
| DeltaSVM (abs) | 0.557   | ±0.003 | 0.645 | ±0.009 | 0.543        | ±0.002        | 0.612        | ±0.004        | 0.545        | ±0.000        | 0.632        | ±0.001        |

|           |              |               |              |               |       |        |       |        |       |        |       |        |
|-----------|--------------|---------------|--------------|---------------|-------|--------|-------|--------|-------|--------|-------|--------|
| JASPAR_A  | 0.718        | ±0.017        | 0.657        | ±0.021        | 0.664 | ±0.009 | 0.625 | ±0.011 | 0.631 | ±0.005 | 0.632 | ±0.006 |
| JASPAR_90 | 0.722        | ±0.017        | 0.671        | ±0.022        | 0.662 | ±0.008 | 0.634 | ±0.011 | 0.628 | ±0.005 | 0.634 | ±0.006 |
| JASPAR_75 | 0.718        | ±0.017        | 0.673        | ±0.022        | 0.661 | ±0.008 | 0.636 | ±0.011 | 0.623 | ±0.005 | 0.632 | ±0.006 |
| JASPAR_50 | <b>0.730</b> | <b>±0.015</b> | 0.702        | ±0.022        | 0.679 | ±0.008 | 0.667 | ±0.011 | 0.639 | ±0.005 | 0.657 | ±0.007 |
| JASPAR_25 | <b>0.759</b> | <b>±0.014</b> | <b>0.741</b> | <b>±0.022</b> | 0.701 | ±0.007 | 0.692 | ±0.011 | 0.651 | ±0.005 | 0.607 | ±0.007 |
| JASPAR_10 | 0.686        | ±0.012        | 0.722        | ±0.019        | 0.654 | ±0.007 | 0.682 | ±0.010 | 0.624 | ±0.005 | 0.665 | ±0.007 |
| JASPAR_TF | 0.511        | ±0.019        | 0.536        | ±0.015        | 0.511 | ±0.008 | 0.541 | ±0.008 | 0.512 | ±0.005 | 0.554 | ±0.006 |
| priPhCons | 0.519        | ±0.014        | 0.515        | ±0.015        | 0.558 | ±0.008 | 0.550 | ±0.007 | 0.574 | ±0.004 | 0.574 | ±0.005 |
| mamPhCons | 0.558        | ±0.014        | 0.552        | ±0.015        | 0.593 | ±0.007 | 0.579 | ±0.007 | 0.596 | ±0.004 | 0.605 | ±0.003 |
| verPhCons | 0.569        | ±0.016        | 0.568        | ±0.017        | 0.592 | ±0.007 | 0.584 | ±0.008 | 0.597 | ±0.004 | 0.608 | ±0.003 |
| priPhyloP | 0.504        | ±0.019        | 0.513        | ±0.016        | 0.526 | ±0.009 | 0.525 | ±0.009 | 0.542 | ±0.005 | 0.555 | ±0.006 |
| mamPhyloP | 0.577        | ±0.017        | 0.580        | ±0.018        | 0.586 | ±0.007 | 0.573 | ±0.009 | 0.573 | ±0.005 | 0.583 | ±0.005 |
| verPhyloP | 0.586        | ±0.017        | 0.642        | ±0.015        | 0.591 | ±0.007 | 0.609 | ±0.009 | 0.578 | ±0.004 | 0.597 | ±0.005 |
| GerpN     | 0.639        | ±0.011        | 0.677        | ±0.017        | 0.604 | ±0.008 | 0.639 | ±0.011 | 0.601 | ±0.004 | 0.644 | ±0.007 |



**Supplementary Table 18**

**PCR primers for amplification of targeted regions from genomic DNA.** Overhanging primers add cloning sites for downstream vector integration. All sequences are provided 5' to 3'.

| Element          | Primer  | Sequence                                    |
|------------------|---------|---------------------------------------------|
| F9               | Forward | CCCGGGCTCGAGATCTCCACTGATGAACTGTGC           |
| F9               | Reverse | CCGGATTGCCAAGCTTAACCTTTGCTAGCAGATTGTG       |
| FOXE1            | Forward | CCCGGGCTCGAGATCTCTCGCCAGCGGTCCGCAGG         |
| FOXE1            | Reverse | CCGGATTGCCAAGCTTGGCCTGGCGTCCCCGGAACG        |
| GP1BB            | Forward | CCCGGGCTCGAGATCTTTGTGAATGCCGCGTCTCTG        |
| GP1BB            | Reverse | CCGGATTGCCAAGCTTACGACCAGAGCTCCTCTC          |
| HBB              | Forward | CCCGGGCTCGAGATCTAAGGACAGGTACGGCTGTC         |
| HBB              | Reverse | CCGGATTGCCAAGCTTGGTGTCTGTGTTGAGGTTGC        |
| HBG1             | Forward | CCCGGGCTCGAGATCTGCAGTATCCTCTTGGGGGCC        |
| HBG1             | Reverse | CCGGATTGCCAAGCTTGGCGTCTGGACTAGGAGCTTATTG    |
| HNF4A            | Forward | CCCGGGCTCGAGATCCCCAGAGTGCAGGACTAG           |
| HNF4A            | Reverse | CCGGATTGCCAAGCTGGCCAAGCCCACCCAG             |
| LDLR             | Forward | CCCGGGCTCGAGATCTAGCTCTTACCAGGAGACCCA        |
| LDLR             | Reverse | CCGGATTGCCAAGCTTGCTCGCAGCCTCTGCCAG          |
| MSMB             | Forward | CCCGGGCTCGAGATCAAAGTCCAGCAATTCAGC           |
| MSMB             | Reverse | CCGGATTGCCAAGCTAAGCAGGACTCCTTATAGACAGG      |
| PKLR             | Forward | CCCGGGCTCGAGATCTAGGTTACAGAGTGGTGAAGGC       |
| PKLR             | Reverse | CCGGATTGCCAAGCTTGCTTTCAGTGTGGGCTTGG         |
| TERT             | Forward | CCCGGGCTCGAGATCCCAGGACCGCGCTTCCCAC          |
| TERT             | Reverse | CCGGATTGCCAAGCTCGCGGGGGTGGCCGGG             |
| SORT1            | Forward | GAGGATATCAAGATCTGAACTGGAAAAGCCCTGTCCGG      |
| SORT1            | Reverse | TCTAGTGTCTAAGCTTCAGACCCCCGGGACTGGAC         |
| IRF4             | Forward | GAGGATATCAAGATCTGGCGTGTCCGCTGTGTTGG         |
| IRF4             | Reverse | TCTAGTGTCTAAGCTTACGGGGGTAAGGAGTGC           |
| IRF6             | Forward | GAGGATATCAAGATCTTCTGTTTGTGTTAGCTTACCTC      |
| IRF6             | Reverse | TCTAGTGTCTAAGCTTGTAATGGTGAAGTAGGAAGTTG      |
| MYC (rs6983267)  | Forward | GAGGATATCAAGATCTCTGCATCGCTCCATAGAG          |
| MYC (rs6983267)  | Reverse | TCTAGTGTCTAAGCTTTGCTGGTAGAAGTACG            |
| MYC (rs11986220) | Forward | GAGGATATCAAGATCTGGTAAGTCAACATGAAATTATAAACC  |
| MYC (rs11986220) | Reverse | TCTAGTGTCTAAGCTTCAAGTACTGTGGGGGTTTTGTTAG    |
| TCF7L2           | Forward | GAGGATATCAAGATCTAGGTTCTGTTTCTTGCTTAG        |
| TCF7L2           | Reverse | TCTAGTGTCTAAGCTTATTACAAATTATTAGAACTTTC      |
| ZFAND3           | Forward | GAGGATATCAAGATCTTTCATGTTTCCCCGATGTTG        |
| ZFAND3           | Reverse | TCTAGTGTCTAAGCTTTCCTGCCCAAGTTGCACAGC        |
| BCL11A           | Forward | GCTCGCTAGCCTCGAGCCTAACACAGTAGCTGGTACCTG     |
| BCL11A           | Reverse | CGCCGAGGCCAGATCTGTACTGATGGACCTTGGGTG        |
| UC88             | Forward | GAGGATATCAAGATCTTACAGATAAATGCACACATGTATACG  |
| UC88             | Reverse | TCTAGTGTCTAAGCTTGGGACTCGGTGGCGGTG           |
| ZRS              | Forward | TGGCCTAACTGGCCGGTACCTGAGATATGGCTTCATTTTCTGT |
| ZRS              | Reverse | ATGATCTAAGCTTAAGGCTGAGCAACATGACAGCAC        |
| RET              | Forward | CTAGCCCGGGCTCGAGCAGAGGCACAGGGTCAAAGC        |
| RET              | Reverse | TGCAGATCGCAGATCTGAAGCCAGAATTCCCGCTGC        |

### Supplementary Table 19

**PCR primers for amplification from luciferase vectors prior to mutagenesis.** Overhanging primers add cloning sites and adaptor sequence for downstream vector integration. All sequences are provided 5' to 3'.

| Element          | Primer  | Sequence                                                   |
|------------------|---------|------------------------------------------------------------|
| F9               | Forward | CCGGGCTCGAGATCTGCGATCTAAGTAAGCGTCCCCTGATGAACTGTGC          |
| F9               | Reverse | TCTAGACCTGCAGGGCATGCAAGCTTTAACCTTTGCTAGCAGATTGTG           |
| FOXE1            | Forward | CCGGGCTCGAGATCTGCGATCTAAGTAAGCCTCGCCAGCGGTCCGCAGG          |
| FOXE1            | Reverse | TCTAGACCTGCAGGGCATGCAAGCTTGGCCTGGCGTCCCCGGAACG             |
| GP1BB            | Forward | CCGGGCTCGAGATCTGCGATCTAAGTAAGCGTTGTGAATGCCCGTCCTG          |
| GP1BB            | Reverse | TCTAGACCTGCAGGGCATGCAAGCTTACGACCAGAGCTCCTCTC               |
| HBB              | Forward | CCGGGCTCGAGATCTGCGATCTAAGTAAGCAAGGACAGGTACGGCTGTC          |
| HBB              | Reverse | TCTAGACCTGCAGGGCATGCAAGCTTGGTGTCTGTGTTGAGGTTGC             |
| HBG1             | Forward | CCGGGCTCGAGATCTGCGATCTAAGTAAGCGCAGTATCCTCTTGGGGGC          |
| HBG1             | Reverse | TCTAGACCTGCAGGGCATGCAAGCTTGGCCTTGGACTAGGAGCTTATTG          |
| HNF4A            | Forward | CCGGGCTCGAGATCTGCGATCTAAGTAAGCCCCAGAGTGCAGGACTAG           |
| HNF4A            | Reverse | TCTAGACCTGCAGGGCATGCAAGCTTGGCCAAAGCCACCCAG                 |
| LDLR             | Forward | CCGGGCTCGAGATCTGCGATCTAAGTAAGCAGCTCTTACCAGGACCCCA          |
| LDLR             | Reverse | TCTAGACCTGCAGGGCATGCAAGCTTGTCTCGCAGCCTCTGCCAG              |
| MSMB             | Forward | CCGGGCTCGAGATCTGCGATCTAAGTAAGCAAAGTCCAGCAATTCAGC           |
| MSMB             | Reverse | TCTAGACCTGCAGGGCATGCAAGCTTAAGCAGGACTCCTTATAGACAGG          |
| PKLR             | Forward | CCGGGCTCGAGATCTGCGATCTAAGTAAGCAGGTTACAGAGTGGTGAAGGC        |
| PKLR             | Reverse | TCTAGACCTGCAGGGCATGCAAGCTTGTCTTTCAGTGTGGCCTGG              |
| TERT             | Forward | CCGGGCTCGAGATCTGCGATCTAAGTAAGCCAGGACCGGCTTCCCAC            |
| TERT             | Reverse | TCTAGACCTGCAGGGCATGCAAGCTTCCGGGGGTGGCCGGG                  |
| SORT1            | Forward | GATATCAAGATCTGGCCTCGGCGGCCAAGCGAACTGGAAAAGCCCTGTCCGG       |
| SORT1            | Reverse | TCTAGACCTGCAGGGCATGCAAGCTTCAGACCCCGGGACTGGAC               |
| SORT1-flip       | Forward | GATATCAAGATCTGGCCTCGGCGGCCAAGCCAGACCCCGGGACTGGAC           |
| SORT1-flip       | Reverse | TCTAGACCTGCAGGGCATGCAAGCTTGAAGTGGAAAAGCCCTGTCCGG           |
| IRF4             | Forward | GATATCAAGATCTGGCCTCGGCGGCCAATGGCGTGTCCGCTGTGG              |
| IRF4             | Reverse | TCTAGACCTGCAGGGCATGCGAATTCACGGGGTAAGGAGTGC                 |
| IRF6             | Forward | GATATCAAGATCTGGCCTCGGCGGCCAAGCCTCTGTTTGCTTAGCTACCTC        |
| IRF6             | Reverse | TCTAGACCTGCAGGGCATGCAAGCTTGTAATGGTGAAGTAGGAGTTG            |
| MYC (rs6983267)  | Forward | GATATCAAGATCTGGCCTCGGCGGCCAAGCCTGCATCGTCCATAGAG            |
| MYC (rs6983267)  | Reverse | TCTAGACCTGCAGGGCATGCAAGCTTGTCTGGTAGAACTTACG                |
| MYC (rs11986220) | Forward | GATATCAAGATCTGGCCTCGGCGGCCAATGGTAAGTCAACATGAAATTATAAAC     |
| MYC (rs11986220) | Reverse | TCTAGACCTGCAGGGCATGCGAATTCCTAAGTACTGTGGGGTTTTGTTAG         |
| TCF7L2           | Forward | GATATCAAGATCTGGCCTCGGCGGCCAATAGGTTCTGTTTCTTGGCTTAG         |
| TCF7L2           | Reverse | TCTAGACCTGCAGGGCATGCGAATTCATTACAAATATTAGAACTTTC            |
| ZFAND3           | Forward | GATATCAAGATCTGGCCTCGGCGGCCAAGCGTTTCATGTTTCCCCCGTATGTG      |
| ZFAND3           | Reverse | TCTAGACCTGCAGGGCATGCAAGCTTTCCTGCCCAAGTTGCACAGC             |
| BCL11A           | Forward | GATATCAAGATCTGGCCTCGGCGGCCAATCCTAACACAGTAGCTGGTACCTG       |
| BCL11A           | Reverse | TCTAGACCTGCAGGGCATGCGAATTCGTACTGATGGACCTTGGGTG             |
| UC88             | Forward | GATATCAAGATCTGGCCTCGGCGGCCAAGCATAACAGATAAATGCACACATGTATACG |
| UC88             | Reverse | TCTAGACCTGCAGGGCATGCAAGCTTGGGACTCGGTGGCGGTG                |
| ZRS              | Forward | AACATTTCTTGGCCTAACTGGCCGGTACCTGAGATATGGCTTCATTTTCTGT       |
| ZRS              | Reverse | TCTAGACCTGCAGGGCATGCAAGCTTGTCTGAGCAACATGACAGCAC            |
| RET              | Forward | GAGCTCTTACCGTGTCTAGCCCGGGCTCGAGCAGAGGCACCAGGGTCAAAGC       |
| RET              | Reverse | TCTAGACCTGCAGGGCATGCAAGCTTGAAGCCAGAAATCCCGCTGC             |

### Supplementary Table 20

Primers for error-prone PCR with Mutazyme II. This PCR adds a 15 or 20 bp random tag (i.e. barcode and marked with N characters below) contained within an overhanging primer oligo to each construct. All sequences are provided 5' to 3'.

| Element type                              | Primer  | Sequence                                                               |
|-------------------------------------------|---------|------------------------------------------------------------------------|
| Promoter                                  | Forward | CCGGGCTCGAGATCTGCGATCTAAGTAAGC                                         |
| Promoter                                  | Reverse | GCTCGAAGCGACTGTCAGCTCAGACTCTAGGNNN...NNNTCTAGACCTGCAGGGC<br>ATGCAAGCTT |
| Enhancer<br>pGL4.23c,<br>pGL3c,<br>pGL4Zc | Forward | GATATCAAGATCTGGCCTCGGCGGCCAAGC                                         |
| Enhancer<br>pGL4.23d                      | Forward | GATATCAAGATCTGGCCTCGGCGGCCGAAT                                         |
| Enhancer<br>pGL4.23c,<br>pGL4Zc           | Reverse | GCTCGAAGCGACTGTCAGCTCAGACTCTAGGNNN...NNNTCTAGACCTGCAGGGC<br>ATGCAAGCTT |
| Enhancer<br>pGL3c                         | Reverse | GCTCGAAGCGACTGTCAGCTCAGACTCTAGGNNN...NNNTCTAGACCTGCAGGGC<br>ATGCAGATCT |
| Enhancer<br>pGL4.23d                      | Reverse | GCTCGAAGCGACTGTCAGCTCAGACTCTAGGNNN...NNNTCTAGACCTGCAGGGC<br>ATGCGAATTC |

### Supplementary Table 21

Primers for preparing association libraries for short enhancers/promoters. These primers are also used to amplify longer enhancers and then those products are fragmented for subassembly ([Supplementary Table 22](#)). Plasmid DNA libraries are amplified with sequencing adaptor primers capturing the cloned sequence with its tag and adding the P5/P7 Illumina flow cell sequences. All sequences are provided 5' to 3'.

| Element               | Primer  | Sequence                                                              |
|-----------------------|---------|-----------------------------------------------------------------------|
| Promoter/<br>pGL4.11  | Forward | AATGATACGGCGACCACCGAGATCTACAC#####CCGGGCTCGAGATCTGC<br>GATCTAAG       |
| Enhancer/<br>pGL4.23c | Forward | AATGATACGGCGACCACCGAGATCTACAC#####GATATCAAGATCTGGCC<br>TCGGCGGCCAAGC  |
| Enhancer/<br>pGL4.23d | Forward | AATGATACGGCGACCACCGAGATCTACAC#####GATATCAAGATCTGGCC<br>TCGGCGGCCGAAT  |
| Enhancer/<br>pGL3     | Forward | AATGATACGGCGACCACCGAGATCTACAC#####TCGATAGGTACCGAGCT<br>CTTACGCGTGCTAG |
| Enhancer/<br>pGL4Zc   | Forward | AATGATACGGCGACCACCGAGATCTACAC#####AACATTTCTCTGGCCTA<br>ACTGGCCGGTACC  |
| All                   | Reverse | CAAGCAGAAGACGGCATAACGAGATGCTCGAAGCGACTGTCAGCTCAGAC                    |

### Supplementary Table 22

Amplification of Nextera fragmented molecules for the preparation of fragment association libraries (long enhancers/promoters). Hash characters (#) denote a placeholder for a defined index sequence (i.e. sample barcode), one for each sample/replicate.

| Primer  | Sequence                                                             |
|---------|----------------------------------------------------------------------|
| Forward | AATGATACGGCGACCACCGAGATCTACAC#####TCGTTCGGCAGCGTCAGATGTGTATAAGAGACAG |
| Reverse | CAAGCAGAAGACGGCATACGAGATGCTCGAAGCGACTGTCAGCTCAGAC                    |

### Supplementary Table 23

Sequencing primers used for association libraries. All sequences are provided 5' to 3'.

| Primer                                  | Sequence                           |
|-----------------------------------------|------------------------------------|
| <b>Promoter/pGL4.11</b>                 |                                    |
| Read 1                                  | CCGGGCTCGAGATCTGCGATCTAAGTAAGC     |
| Read 2                                  | TCTAGACCTGCAGGGCATGCAAGCTT         |
| Index Read 1                            | AAGCTTGCATGCCCTGCAGGTCTAGA         |
| Index Read 2                            | GCTTACTTAGATCGCAGATCTCGAGCCCGG     |
| <b>Enhancer/pGL4.23c</b>                |                                    |
| Read 1                                  | GATATCAAGATCTGGCCTCGGCGGCCAAGC     |
| Read 2                                  | TCTAGACCTGCAGGGCATGCAAGCTT         |
| Index Read 1                            | AAGCTTGCATGCCCTGCAGGTCTAGA         |
| Index Read 2                            | GCTTGGCCGCCGAGGCCAGATCTTGATATC     |
| <b>Enhancer/pGL4.23d</b>                |                                    |
| Read 1                                  | GATATCAAGATCTGGCCTCGGCGGCCGAAT     |
| Read 2                                  | TCTAGACCTGCAGGGCATGCGAATTC         |
| Index Read 1                            | GAATTCGCATGCCCTGCAGGTCTAGA         |
| Index Read 2                            | ATTCGGCCGCCGAGGCCAGATCTTGATATC     |
| <b>Enhancer/pGL3c</b>                   |                                    |
| Read 1                                  | TCGATAGGTACCGAGCTCTTACGCGTGCTAG    |
| Read 2                                  | TCTAGACCTGCAGGGCATGCAGATCT         |
| Index Read 1                            | AGATCTGCATGCCCTGCAGGTCTAGA         |
| Index Read 2                            | CTAGCACGCGTAAGAGCTCGGTACCTATCGA    |
| <b>Enhancer/pGL4Zc</b>                  |                                    |
| Read 1                                  | AACATTTCTCTGGCCTAACTGGCCGGTACC     |
| Read 2                                  | TCTAGACCTGCAGGGCATGCAAGCTT         |
| Index Read 1                            | AAGCTTGCATGCCCTGCAGGTCTAGA         |
| Index Read 2                            | GGTACCGGCCAGTTAGGCCAGAGAAATGTT     |
| <b>Nextera fragment library</b>         |                                    |
| Read 1                                  | TCGTTCGGCAGCGTCAGATGTGTATAAGAGACAG |
| Read 2                                  | TCTAGACCTGCAGGGCATGCAAGCTT         |
| Read 2 (pGL4.23c/pGL4Zc/pGL4.11c)       | TCTAGACCTGCAGGGCATGCGAATTC         |
| Read 2 (pGL4.23d)                       | TCTAGACCTGCAGGGCATGCAGATCT         |
| Read 2 (pGL3c)                          | TCTAGACCTGCAGGGCATGCAGATCT         |
| Index Read 1                            | AAGCTTGCATGCCCTGCAGGTCTAGA         |
| Index Read 1 (pGL4.23c/pGL4Zc/pGL4.11c) | GAATTCGCATGCCCTGCAGGTCTAGA         |
| Index Read 1 (pGL4.23d)                 | GAATTCGCATGCCCTGCAGGTCTAGA         |
| Index Read 1 (pGL3)                     | AGATCTGCATGCCCTGCAGGTCTAGA         |
| Index Read 2                            | CTGTCTTTATACATCTGACGCTGCCGACGA     |

### Supplementary Table 24

Primers used for measuring siRNA knockdown efficiency using qPCR. All sequences are provided 5' to 3'.

| Element | Primer  | Sequence                |
|---------|---------|-------------------------|
| GABPA   | Forward | AAGAACGCCTTGGGATACCCCT  |
| GABPA   | Reverse | GTGAGGTCTATATCGGTCATGCT |
| TERT    | Forward | TCACGGAGACCACGTTTCAA    |
| TERT    | Reverse | TTCAAGTGCTGTCTGATTCCAAT |
| GUSB    | Forward | CTCATTTGGAATTTTGCCGATT  |
| GUSB    | Reverse | CCGAGTGAAGATCCCTTTTTA   |

### Supplementary Table 25

Primers used for preparing RNA and DNA count sequencing libraries. The 1<sup>st</sup> round reverse primer is also the RT primer. Hash characters (#) denote a placeholder for a defined index sequence (i.e. sample barcode), one for each sample/replicate. Ten N characters ("NNNNNNNNNN") are the UMI positions ordered as random bases. Amplifications were performed in two rounds, a 1<sup>st</sup> round of three cycles incorporating unique molecular identifiers (UMIs) followed by an Ampure cleanup and 2<sup>nd</sup> round of 15 cycles with primers matching the Illumina flowcell oligos. Sequences are provided 5' to 3'.

| Element              | Primer                           | Sequence                                                                    |
|----------------------|----------------------------------|-----------------------------------------------------------------------------|
| Promoter/<br>pGL4.11 | Forward<br>1 <sup>st</sup> round | AATGATACGGCGACCACCGAGATCTACACTAGACACCCTGCTGCTTGCGCCAGC                      |
| Enhancer/<br>pGL4    | Forward<br>1 <sup>st</sup> round | AATGATACGGCGACCACCGAGATCTACACGCGAGATTCTCATTAAAGGCCAAGAAG                    |
| Enhancer/<br>pGL3    | Forward<br>1 <sup>st</sup> round | AATGATACGGCGACCACCGAGATCTACACGAGAGATCCTCATAAAGGCCAAGAAG                     |
| All                  | Reverse<br>1 <sup>st</sup> round | CAAGCAGAAGACGGCATAACGAGATAC#####CANNNNNNNNNNCTGCTCGA<br>AGCGACTGTCAGCTCAGAC |
| All                  | Forward<br>2 <sup>nd</sup> round | AATGATACGGCGACCACCGAGATCTACAC                                               |
| All                  | Reverse<br>2 <sup>nd</sup> round | CAAGCAGAAGACGGCATAACGAGAT                                                   |

### Supplementary Table 26

Sequencing primers used for RNA and DNA count libraries. All sequences are provided 5' to 3'.

| Primer                    | Sequence                            |
|---------------------------|-------------------------------------|
| Read 1 (Promoter/pGL4.11) | GCCAGGATCAACGTCTAAGGCCGCGACTCTAGA   |
| Read 1 (Enhancer/pGL4)    | GAAGGGCGGCAAGATCGCCGTGTAATAATTCTAGA |
| Read 1 (Enhancer/pGL3)    | CAAGAAGGGCGGAAAGATCGCCGTGTAATTCTAGA |
| Read 2                    | CTGCTCGAAGCGACTGTCAGCTCAGACTCTAGG   |
| Index Read                | CCTAGAGTCTGAGCTGACAGTCGCTTCGAGCAG   |

## Supplementary References

1. Reijnen, M. J., Sladek, F. M., Bertina, R. M. & Reitsma, P. H. Disruption of a binding site for hepatocyte nuclear factor 4 results in hemophilia B Leyden. *Proc. Natl. Acad. Sci. U. S. A.* **89**, 6300–6303 (1992).
2. Reijnen, M. J., Peerlinck, K., Maasdam, D., Bertina, R. M. & Reitsma, P. H. Hemophilia B Leyden: substitution of thymine for guanine at position -21 results in a disruption of a hepatocyte nuclear factor 4 binding site in the factor IX promoter. *Blood* **82**, 151–158 (1993).
3. Kheradpour, P. & Kellis, M. Systematic discovery and characterization of regulatory motifs in ENCODE TF binding experiments. *Nucleic Acids Res.* **42**, 2976–2987 (2014).
4. Landa, I. *et al.* The variant rs1867277 in FOXE1 gene confers thyroid cancer susceptibility through the recruitment of USF1/USF2 transcription factors. *PLoS Genet.* **5**, e1000637 (2009).
5. Ludlow, L. B. *et al.* Identification of a mutation in a GATA binding site of the platelet glycoprotein Ibbeta promoter resulting in the Bernard-Soulier syndrome. *J. Biol. Chem.* **271**, 22076–22080 (1996).
6. Khan, A. *et al.* JASPAR 2018: update of the open-access database of transcription factor binding profiles and its web framework. *Nucleic Acids Res.* **46**, D260–D266 (2018).
7. Giardine, B. *et al.* HbVar database of human hemoglobin variants and thalassemia mutations: 2007 update. *Hum. Mutat.* **28**, 206 (2007).
8. Moi, P. *et al.* A novel silent beta-thalassemia mutation in the distal CACCC box affects the binding and responsiveness to EKLF. *Br. J. Haematol.* **126**, 881–884 (2004).
9. Sgourou, A. *et al.* Thalassaemia mutations within the 5'UTR of the human beta-globin gene disrupt transcription. *Br. J. Haematol.* **124**, 828–835 (2004).
10. Gumucio, D. L. *et al.* Nuclear proteins that bind the human gamma-globin gene promoter: alterations in binding produced by point mutations associated with hereditary persistence of fetal hemoglobin. *Mol. Cell. Biol.* **8**, 5310–5322 (1988).
11. Sykes, K. & Kaufman, R. A naturally occurring gamma globin gene mutation enhances SP1 binding activity. *Mol. Cell. Biol.* **10**, 95–102 (1990).
12. Thomas, H. *et al.* A distant upstream promoter of the HNF-4alpha gene connects the transcription factors involved in maturity-onset diabetes of the young. *Hum. Mol. Genet.* **10**, 2089–2097 (2001).
13. Wirsing, A. *et al.* Novel monogenic diabetes mutations in the P2 promoter of the HNF4A gene are associated with impaired function in vitro. *Diabet. Med.* **27**, 631–635 (2010).

14. Thomas, G. *et al.* Multiple loci identified in a genome-wide association study of prostate cancer. *Nat. Genet.* **40**, 310–315 (2008).
15. Eeles, R. A. *et al.* Multiple newly identified loci associated with prostate cancer susceptibility. *Nat. Genet.* **40**, 316–321 (2008).
16. Kote-Jarai, Z. *et al.* Multiple novel prostate cancer predisposition loci confirmed by an international study: the PRACTICAL Consortium. *Cancer Epidemiol. Biomarkers Prev.* **17**, 2052–2061 (2008).
17. Zheng, S. L. *et al.* Genetic variants and family history predict prostate cancer similar to prostate-specific antigen. *Clin. Cancer Res.* **15**, 1105–1111 (2009).
18. Chang, B.-L. *et al.* Fine mapping association study and functional analysis implicate a SNP in MSMB at 10q11 as a causal variant for prostate cancer risk. *Hum. Mol. Genet.* **18**, 1368–1375 (2009).
19. Buckland, P. R. *et al.* Strong bias in the location of functional promoter polymorphisms. *Hum. Mutat.* **26**, 214–223 (2005).
20. Manco, L. *et al.* A new PKLR gene mutation in the R-type promoter region affects the gene transcription causing pyruvate kinase deficiency. *Br. J. Haematol.* **110**, 993–997 (2000).
21. van Wijk, R. *et al.* Disruption of a novel regulatory element in the erythroid-specific promoter of the human PKLR gene causes severe pyruvate kinase deficiency. *Blood* **101**, 1596–1602 (2003).
22. Bauer, D. E. *et al.* An erythroid enhancer of BCL11A subject to genetic variation determines fetal hemoglobin level. *Science* **342**, 253–257 (2013).
23. Canver, M. C. *et al.* BCL11A enhancer dissection by Cas9-mediated in situ saturating mutagenesis. *Nature* **527**, 192–197 (2015).
24. Vinjamur, D. S. & Bauer, D. E. Growing and Genetically Manipulating Human Umbilical Cord Blood-Derived Erythroid Progenitor (HUDEP) Cell Lines. *Methods Mol. Biol.* **1698**, 275–284 (2018).
25. Praetorius, C. *et al.* A polymorphism in IRF4 affects human pigmentation through a tyrosinase-dependent MITF/TFAP2A pathway. *Cell* **155**, 1022–1033 (2013).
26. Rahimov, F. *et al.* Disruption of an AP-2alpha binding site in an IRF6 enhancer is associated with cleft lip. *Nat. Genet.* **40**, 1341–1347 (2008).
27. Yeager, M. *et al.* Genome-wide association study of prostate cancer identifies a second risk locus at 8q24. *Nat. Genet.* **39**, 645–649 (2007).
28. Haiman, C. A. *et al.* A common genetic risk factor for colorectal and prostate cancer. *Nat. Genet.* **39**, 954–956 (2007).
29. Tomlinson, I. *et al.* A genome-wide association scan of tag SNPs identifies a susceptibility variant for colorectal cancer at 8q24.21. *Nat. Genet.* **39**, 984–988 (2007).
30. Pomerantz, M. M. *et al.* The 8q24 cancer risk variant rs6983267 shows long-range interaction with MYC in colorectal cancer. *Nat. Genet.* **41**, 882–884 (2009).

31. Ahmadiyeh, N. *et al.* 8q24 prostate, breast, and colon cancer risk loci show tissue-specific long-range interaction with MYC. *Proc. Natl. Acad. Sci. U. S. A.* **107**, 9742–9746 (2010).
32. Jia, L. *et al.* Functional enhancers at the gene-poor 8q24 cancer-linked locus. *PLoS Genet.* **5**, e1000597 (2009).
33. Zerbino, D. R., Wilder, S. P., Johnson, N., Juettemann, T. & Flicek, P. R. The ensembl regulatory build. *Genome Biol.* **16**, 56 (2015).
34. Emison, E. S. *et al.* A common sex-dependent mutation in a RET enhancer underlies Hirschsprung disease risk. *Nature* **434**, 857–863 (2005).
35. Lyssenko, V. *et al.* Mechanisms by which common variants in the TCF7L2 gene increase risk of type 2 diabetes. *J. Clin. Invest.* **117**, 2155–2163 (2007).
36. Bejerano, G. *et al.* Ultraconserved elements in the human genome. *Science* **304**, 1321–1325 (2004).
37. Visel, A. *et al.* Ultraconservation identifies a small subset of extremely constrained developmental enhancers. *Nat. Genet.* **40**, 158–160 (2008).
38. Visel, A., Minovitsky, S., Dubchak, I. & Pennacchio, L. A. VISTA Enhancer Browser—a database of tissue-specific human enhancers. *Nucleic Acids Res.* **35**, D88–92 (2007).
39. Pasquali, L. *et al.* Pancreatic islet enhancer clusters enriched in type 2 diabetes risk-associated variants. *Nat. Genet.* **46**, 136–143 (2014).
40. VanderMeer, J. E. & Ahituv, N. cis-regulatory mutations are a genetic cause of human limb malformations. *Dev. Dyn.* **240**, 920–930 (2011).
41. Gurnett, C. A. *et al.* Two novel point mutations in the long-range SHH enhancer in three families with triphalangeal thumb and preaxial polydactyly. *Am. J. Med. Genet. A* **143A**, 27–32 (2007).
42. Al-Qattan, M. M., Al Abdulkareem, I., Al Haidan, Y. & Al Balwi, M. A novel mutation in the SHH long-range regulator (ZRS) is associated with preaxial polydactyly, triphalangeal thumb, and severe radial ray deficiency. *Am. J. Med. Genet. A* **158A**, 2610–2615 (2012).
43. Farooq, M. *et al.* Preaxial polydactyly/triphalangeal thumb is associated with changed transcription factor-binding affinity in a family with a novel point mutation in the long-range cis-regulatory element ZRS. *Eur. J. Hum. Genet.* **18**, 733–736 (2010).
44. Vanlerberghe, C. *et al.* Intrafamilial variability of ZRS-associated syndrome: characterization of a mosaic ZRS mutation by pyrosequencing. *Clin. Genet.* **88**, 479–483 (2015).
45. Wiczorek, D. *et al.* A specific mutation in the distant sonic hedgehog (SHH) cis-regulator (ZRS) causes Werner mesomelic syndrome (WMS) while complete ZRS duplications underlie Haas type polysyndactyly and preaxial polydactyly (PPD) with or without triphalangeal thumb. *Hum. Mutat.* **31**, 81–89 (2010).
46. VanderMeer, J. E. *et al.* A novel ZRS mutation leads to preaxial polydactyly type 2 in



- a heterozygous form and Werner mesomelic syndrome in a homozygous form. *Hum. Mutat.* **35**, 945–948 (2014).
47. Maas, S. A., Suzuki, T. & Fallon, J. F. Identification of spontaneous mutations within the long-range limb-specific Sonic hedgehog enhancer (ZRS) that alter Sonic hedgehog expression in the chicken limb mutants oligozeugodactyly and silkie breed. *Dev. Dyn.* **240**, 1212–1222 (2011).
  48. Khamis, A. *et al.* Functional analysis of four LDLR 5'UTR and promoter variants in patients with familial hypercholesterolaemia. *Eur. J. Hum. Genet.* **23**, 790–795 (2015).
  49. Bell, R. J. A. *et al.* Cancer. The transcription factor GABP selectively binds and activates the mutant TERT promoter in cancer. *Science* **348**, 1036–1039 (2015).
  50. Horn, S. *et al.* TERT promoter mutations in familial and sporadic melanoma. *Science* **339**, 959–961 (2013).
  51. Hurst, C. D., Platt, F. M. & Knowles, M. A. Comprehensive mutation analysis of the TERT promoter in bladder cancer and detection of mutations in voided urine. *Eur. Urol.* **65**, 367–369 (2014).
  52. Huang, D.-S. *et al.* Recurrent TERT promoter mutations identified in a large-scale study of multiple tumour types are associated with increased TERT expression and telomerase activation. *Eur. J. Cancer* **51**, 969–976 (2015).
